# Supplementary material for: Reliable wolf-dog hybrid detection in Europe using a reduced SNP panel developed for non-invasively collected samples
Source: Springer Nature journal article supplement (doi:10.1186/s12864-021-07761-5), 2021-06-25

$$\text{DeltaK} = \text{mean}(|L''(K)|) / \text{sd}(L(K))$$

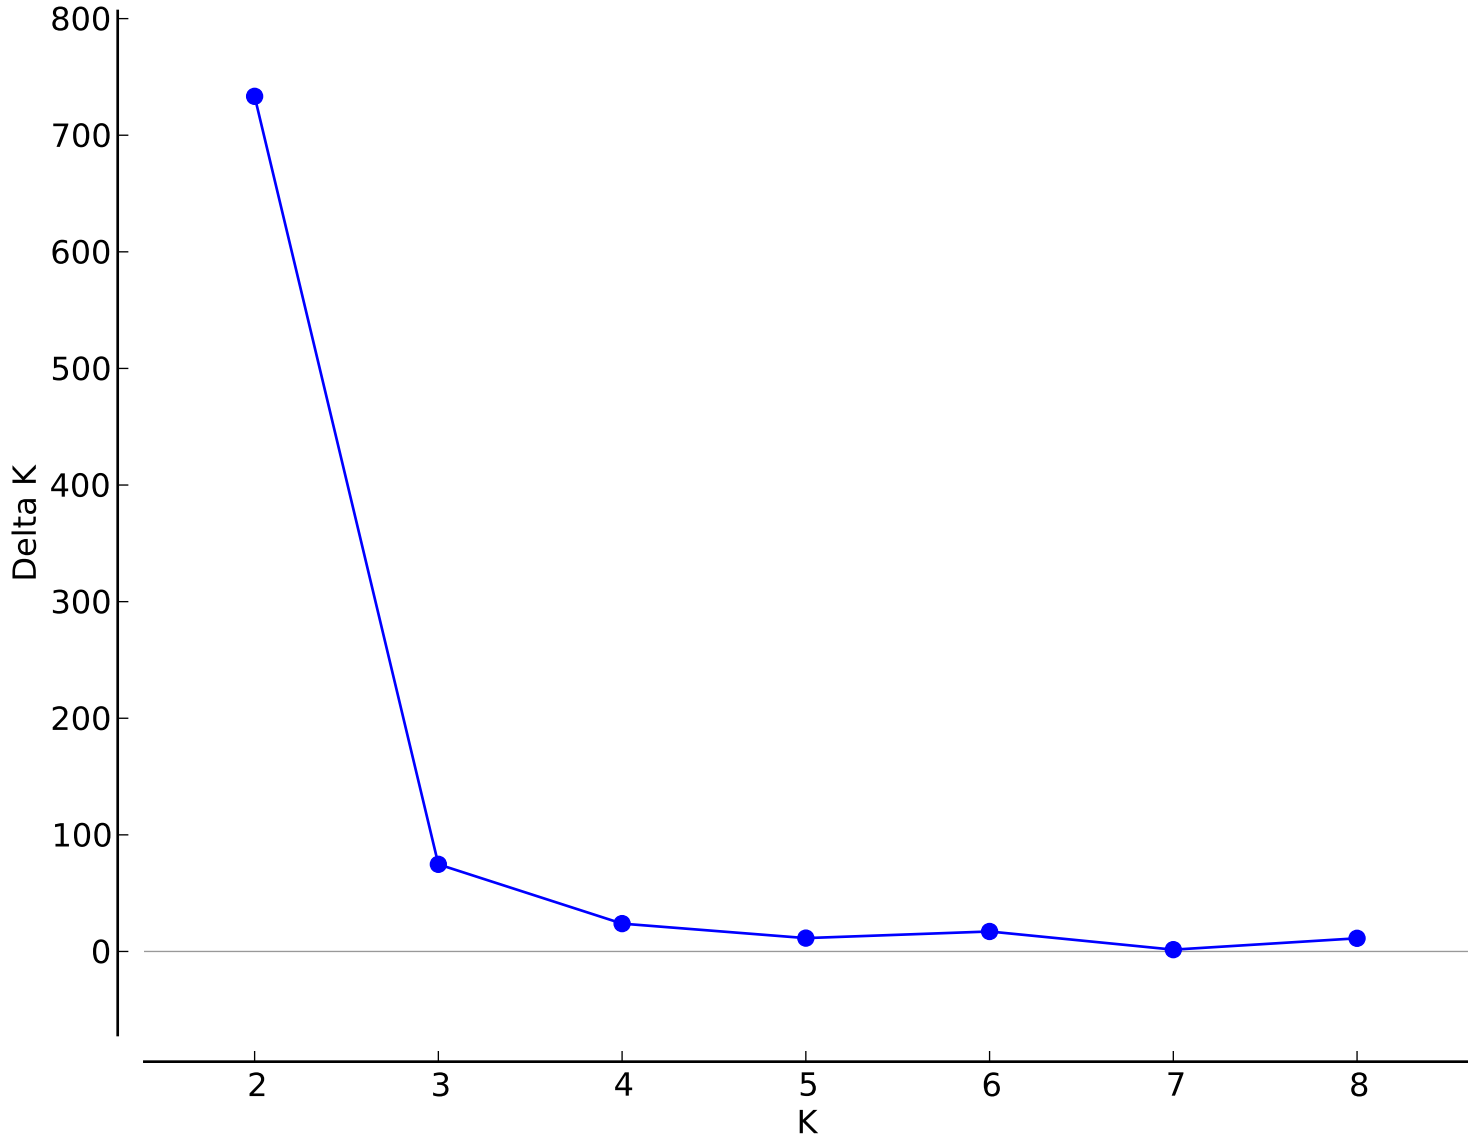

Supplement: MOESM17 [file 12864_2021_7761_MOESM17_ESM.pdf]
