# Supplementary material for: Reliable wolf-dog hybrid detection in Europe using a reduced SNP panel developed for non-invasively collected samples
Source: BMC Genomics. 2021 Jun 25;22:473. doi: 10.1186/s12864-021-07761-5 (PMC8235813; doi:10.1186/s12864-021-07761-5)
Supplement: Supplementary file 1 — Additional file 1: Table S1. Comparison of non-invasive samples to the consensus of corresponding invasive samples. Corresponding samples are on the same row. False allele: an allele seen in non-invasive sample but not in corresponding invasive sample; Missing allele: an allele seen in invasive sample but not detected in the corresponding non-invasive sample; Missing data: sample didn’t produce readable genotype, Hom: homozygous, Het: heterozygous. [file 12864_2021_7761_MOESM1_ESM.xlsx]

## Sheet: Sheet1
Invasive samples			Non-invasive samples
Sample name	Hom loci (n)	Het loci (n)	Sample name	Sample type	False allele (n)	Missing allele (n)	Missing data (n)
WA216	85	2	WA214_1	hair	0	0	2
WA216	85	2	WA214_2	hair	0	0	2
W150976	90	3	W150975_1	hair	0	0	12
W150976	90	3	W150975_2	hair	1	1	10
W150976	90	3	W150975_3	hair	0	0	7
W150934	88	5	WF627_1	saliva	0	0	1
W150934	88	5	WF627_2	saliva	0	0	1
W150934	88	5	WF627_3	saliva	0	0	1
W151431	85	8	W150788	scat	0	0	0
W160071	90	3	WF275_1	scat	0	0	1
W160071	90	3	WF275_2	scat	0	0	0
W160071	90	3	WF275_3	scat	0	0	0
W160348	92	1	WE245_1	scat	0	0	1
W160348	92	1	WE245_2	scat	0	0	1
W160348	92	1	WE245_3	scat	0	0	4
W160349	86	7	W160350_1	hair	0	0	1
W160349	86	7	W160350_2	hair	0	0	1
W160349	86	7	W160350_3	hair	0	0	0
WF395	91	2	WF224_1	scat	0	0	0
WF395	91	2	WF224_2	scat	0	0	0
WF395	91	2	WF224_3	scat	0	0	0
WF666	90	3	WE471_1	scat	0	0	2
WF666	90	3	WE471_2	scat	0	0	3
WF666	90	3	WE471_3	scat	0	0	2
WF666	90	3	WE637_1	urine	0	0	4
WF666	90	3	WE637_2	urine	0	0	4
WF666	90	3	WE637_3	urine	0	0	4
W150936	90	3	W150758	scat	0	0	0
W140100	84	4	W1177_1	urine	0	1	1
W140100	84	4	W1177_2	urine	0	1	2
Total	2664	104			1	3	67
