# Supplementary material for: Reliable wolf-dog hybrid detection in Europe using a reduced SNP panel developed for non-invasively collected samples
Source: BMC Genomics. 2021 Jun 25;22:473. doi: 10.1186/s12864-021-07761-5 (PMC8235813; doi:10.1186/s12864-021-07761-5)
Supplement: Supplementary file 2 — Additional file 2: Table S2. Comparison of genotypes from same individuals genotyped with CanineHD chip (Illumina) and microfluidic array (Fluidigm). We assumed Illumina genotype as the true genotype of individual. False allele: an allele seen in Fluidigm genotype but not in corresponding Illumina genotype; Missing allele: an allele seen in Illumina genotype but not in Fluidigm genotype; Hom: homozygous; Het: heterozygous. [file 12864_2021_7761_MOESM2_ESM.xlsx]

## Sheet: Sheet1
Illumina genotype			Fluidigm genotype
Sample name	Hom loci (n)	Het loci (n)	Sample name	False allele (n)	Missing allele (n)
CL54	91	1	CL54	0	0
CL98	91	2	CL98_1	0	0
CL98	91	2	CL98_2	0	0
CL104	90	1	CL104_1	0	0
CL104	90	1	CL104_2	0	0
CL134	26	58	CL134	0	1
CL195	92	1	CL195	0	0
CL245	90	2	CL245	0	0
CL253	90	2	CL253	0	0
CL280	91	2	CL280_1	0	0
CL280	91	2	CL280_2	0	0
CL297	93	0	CL297	0	0
CL308	68	25	CL308_1	0	0
CL308	68	25	CL308_2	0	0
CL309	54	37	CL309	0	0
CL317	92	0	CL317_1	0	0
CL317	92	0	CL317_2	0	0
CL330	93	0	CL330_1	0	0
CL330	93	0	CL330_2	0	0
CL332	91	2	CL332_1	0	0
CL332	91	2	CL332_2	0	0
CL356	93	0	CL356_1	0	0
CL356	93	0	CL356_2	0	0
CL363	90	3	CL363	0	0
CL364	89	3	CL364_1	0	0
CL364	89	3	CL364_2	0	0
CL407	92	1	CL407_1	0	0
CL407	92	1	CL407_2	0	0
V19	88	4	V19_1	0	0
V19	88	4	V19_2	0	0
V25	87	6	V25_1	0	0
V25	87	6	V25_2	0	0
V45	89	4	V45_1	0	0
V45	89	4	V45_2	0	0
V47	93	0	V47	0	0
Total	3027	204		0	1
