# Supplementary material for: Reliable wolf-dog hybrid detection in Europe using a reduced SNP panel developed for non-invasively collected samples
Source: BMC Genomics. 2021 Jun 25;22:473. doi: 10.1186/s12864-021-07761-5 (PMC8235813; doi:10.1186/s12864-021-07761-5)
Supplement: Supplementary file 3 — Additional file 3: Table S3. Genotyping success (proportion of successfully scored loci over all SNP loci) for samples from species that are potential sources of DNA in non-invasively collected samples. [file 12864_2021_7761_MOESM3_ESM.xlsx]

## Sheet: Sheet1
Samples	Genotyping success rate (%)
Human (Homo sapiens)	0
Roe deer (Capreolus capreolus)	0
Red deer (Cervus elaphus)	0
Eurasian goat (Capra aegagrus hircus)	0
Sheep (Ovis sp.) 1	0
Sheep (Ovis sp.) 2	0
Wild boar (Sus scrofa)	0
Stone marten (Martes foina)	0
Pine marten (Martes martes)	0
Wildcat (Felis silvestris)	0
Eurasian lynx (Lynx lynx)	0
Raccoon (Procyon lotor)	0
Golden jackal (Canis aureus) 1	98
Golden jackal (Canis aureus) 2	99
Golden jackal (Canis aureus) 3	100
Fox (Vulpes vulpes) 1	0
Fox (Vulpes vulpes) 2	77
Fox (Vulpes vulpes) 3	78
Fox (Vulpes vulpes) 4	85
Note. – The number next to the species name denotes a different individual.
