# Supplementary material for: Reliable wolf-dog hybrid detection in Europe using a reduced SNP panel developed for non-invasively collected samples
Source: BMC Genomics. 2021 Jun 25;22:473. doi: 10.1186/s12864-021-07761-5 (PMC8235813; doi:10.1186/s12864-021-07761-5)
Supplement: Supplementary file 4 — Additional file 4: Table S4. FST values for dogs and wolves grouped based on the sampling location, except for Italian immigrants that were sampled in Germany. Analysis was performed also without Italian immigrants (n = 7) and Russian wolves (n = 4) due to low sample sizes in these groups. However, the FST values between the remaining groups were the same. When all wolves were combined as one group (n = 288), the overall FST to dogs (without wolf-dog breeds, n = 300) was 0.72 (p < 0.05). The overall FST between wolf-dog breeds (n = 14) and dogs (n = 300) was FST = 0.20, p < 0.05. [file 12864_2021_7761_MOESM4_ESM.xlsx]

## Sheet: Sheet1
	Italian wolves	Italian immigrants	Iberian wolves	German wolves	Romanian wolves	Russian wolves	Finnish wolves
Italian immigrants	0.05 *
Iberian wolves	0.21*	0.27 *
German wolves	0.24 *	0.40 *	0.17 *
Romanian wolves	0.22 *	0.37 *	0.12 *	0.11 *
Russian wolves	0.17 *	0.28 *	0.07 *	0.07 *	0.06 *
Finnish wolves	0.28 *	0.50 *	0.14 *	0.09 *	0.09 *	0.03
Dogs	0.64 *	0.58 *	0.61 *	0.62 *	0.62 *	0.60 *	0.65 *
* P < 0.05.
