# Supplementary material for: Reliable wolf-dog hybrid detection in Europe using a reduced SNP panel developed for non-invasively collected samples
Source: BMC Genomics. 2021 Jun 25;22:473. doi: 10.1186/s12864-021-07761-5 (PMC8235813; doi:10.1186/s12864-021-07761-5)
Supplement: Supplementary file 5 — Additional file 5: Table S5. The first tab contains names, locations and sampling dates for the samples that were genotyped in this study. Column named “Replicates” in the first tab shows how many times the same sample was genotyped, and the number in the parenthesis shows how many times the same individual was genotyped. Samples that were not included in the analysis are indicated. The second tab contains names, locations and sampling dates for the samples from the wolves from Italy and the Iberian Peninsula that were genotyped with the CanineHD Whole-Genome BeadChip (Illumina). The third tab contains sample names and breeds for the dog samples that were genotyped with the Illumina CanineHD chip. In each tab, there are results from the STRUCTURE and NEWHYBRIDS runs, with all possible prior combinations, for all the individuals included in the runs. When the result differed between the runs, several results were included. If the analysis was been done using a consensus genotype based on several samples from the same individual, the same result is indicated for all samples. [file 12864_2021_7761_MOESM5_ESM.xlsx]

## Sheet: Genotyped samples
INDIVIDUAL ID	SAMPLE ID	SPECIES	NOTIFICATIONS	SAMPLE TYPE	COUNTRY	LOCATION	DATE	REPLICATES	STRUCTURE K=2 for all samples (qw)	STRUCTURE K=2 for wolves from Central and Eastern Europe and dogs (qw)	STRUCTURE K=2 for wolves from Italy, immigrants from the Alpine population and dogs (qw)	STRUCTURE K=2 for wolves from Iberian Peninsula and dogs (qw)	NEWHYBRIDS for all wolves, hybrids, jackals, foxes and dogs	NEWHYBRIDS for wolves from Central and Eastern Europe, hybrids, jackals, foxes and dogs	NEWHYBRIDS for wolves from Italy, immigrants from the Alpine population and dogs	NEWHYBRIDS for wolves from Iberian Peninsula and dogs
Leo007	Leo007	Canis aureus		scat	Armenia	Tsiranadzor	20140301	1 (1)	0.96	0.95			wolf qi = 0.99–1.00	wolf qi = 1.00
W150872	GG001m	Canis aureus		scat	Germany	Niedersachsen	20150508	1 (1)	0.96	0.96			wolf qi = 0.99–1.00	wolf qi = 1.00
X150238	X150238	Canis aureus		tissue	Romania	222C Mahmudia, Donausdelta	20150530	2 (2)	0.98	0.98			wolf qi = 1.00	wolf qi = 1.00
GW369m	W150999	Canis lupus		blood	Germany	Niedersachsen	20150622	2 (2)	1	1			wolf qi = 1.00	wolf qi = 1.00
GW411m	WF250	Canis lupus		hairs	Germany	Sachsen	20150118	1 (1)	1	1			wolf qi = 1.00	wolf qi = 1.00
GW452m	W150975	Canis lupus		hairs	Germany	Sachsen	20150726	3 (6)	1	1			wolf qi = 1.00	wolf qi = 1.00
GW479m	W160350	Canis lupus		hairs	Germany	Sachsen	20151212	3 (6)	0.975	0.98			wolf qi = 0.98–1.00	wolf qi = 1.00
GW488m	W160413	Canis lupus		hairs	Germany	Mecklenburg-Vorpommern	20151020	2 (2)	1	1			wolf qi = 1.00	wolf qi = 1.00
GW490m	WA214	Canis lupus		hairs	Germany	Hessen	20100101	2 (4)	1	1			wolf qi = 1.00	wolf qi = 1.00
GW581m	W161157	Canis lupus		hairs	Germany	Brandenburg	20160415	2 (2)	1	1			wolf qi = 1.00	wolf qi = 1.00
ow65	ow65	Canis lupus		museum (archival skin)	Finland	Uusimaa	19050321	1 (1)	0.999	1			wolf qi = 1.00	wolf qi = 1.00
ow74	ow74	Canis lupus		museum (archival skin)	Finland	Lappi	19050318	1 (1)	0.999	1			wolf qi = 1.00	wolf qi = 1.00
ow22	ow22	Canis lupus		museum (bone)	Finland	Kainuu	19640106	1 (1)	1	1			wolf qi = 1.00	wolf qi = 1.00
ow30	ow30	Canis lupus		museum (bone)	Finland	Kainuu	19880101	1 (1)	0.999	1			wolf qi = 1.00	wolf qi = 1.00
ow40	ow40_1	Canis lupus		museum (claw)	Finland	Pohjois-Savo	19020128	1 (2)	1	1			wolf qi = 1.00	wolf qi = 1.00
ow40	ow40_2	Canis lupus		museum (claw)	Finland	Pohjois-Savo	19020128	1 (2)	1	1			wolf qi = 1.00	wolf qi = 1.00
ex4	ex4	Canis lupus		museum (dry blood from tooth)	Finland	Satakunta	19790816	1 (1)	0.9988	1			wolf qi = 1.00	wolf qi = 1.00
ex7	ex7	Canis lupus		museum (dry blood from tooth)	Finland	Oulu	19770110	1 (1)	0.9998	1			wolf qi = 1.00	wolf qi = 1.00
ow10	ow10	Canis lupus		museum (dry blood from tooth)	Finland	Pohjois-Karjala	19771213	1 (1)	0.999	1			wolf qi = 1.00	wolf qi = 1.00
ow101	ow101_1	Canis lupus		museum (dry blood from tooth)	Finland	Aunus	19431200	1 (2)	0.999	1			wolf qi = 1.00	wolf qi = 1.00
ow101	ow101_2	Canis lupus		museum (dry blood from tooth)	Finland	Aunus	19431200	1 (2)	0.999	1			wolf qi = 1.00	wolf qi = 1.00
ow13	ow13_1	Canis lupus		museum (dry blood from tooth)	Finland	Kainuu	19791208	1 (2)	1	1			wolf qi = 1.00	wolf qi = 1.00
ow13	ow13_2	Canis lupus		museum (dry blood from tooth)	Finland	Kainuu	19791208	1 (2)	1	1			wolf qi = 1.00	wolf qi = 1.00
ow19 *	ow19 *	Canis lupus		museum (dry blood from tooth)	Finland	Lappi	19631116	2 (2)
ow34	ow34	Canis lupus		museum (dry blood from tooth)	Finland	Kainuu	19771016	1 (1)	1	1			wolf qi = 1.00	wolf qi = 1.00
ow50	ow50	Canis lupus		museum (dry blood from tooth)	Finland	Lappi	19890321	1 (1)	0.998	1			wolf qi = 1.00	wolf qi = 1.00
ow52	ow52	Canis lupus		museum (dry blood from tooth)	Finland	Lappi	19910306	1 (1)	0.9998	1			wolf qi = 1.00	wolf qi = 1.00
ow55	ow55	Canis lupus		museum (dry blood from tooth)	Finland	Lappi	19901220	1 (1)	0.994	0.98			wolf qi = 1.00	wolf qi = 0.95–0.99
ow7	ow7	Canis lupus		museum (dry blood from tooth)	Finland	Lappi	19830301	1 (1)	1	1			wolf qi = 1.00	wolf qi = 1.00
ow81	ow81	Canis lupus		museum (dry blood from tooth)	Finland	Lappi	19050326	1 (1)	0.998	1			wolf qi = 1.00	wolf qi = 1.00
ow37	ow37	Canis lupus		museum (footpad)	Finland	Kainuu	19751117	1 (1)	0.9818	1			wolf qi = 1.00	wolf qi = 1.00
ow38	ow38	Canis lupus		museum (frozen tissue)	Finland	Pohjois-Karjala	19760216	1 (1)	1	1			wolf qi = 1.00	wolf qi = 1.00
ow87 *	ow87 *	Canis lupus		museum (nerval tissue from tooth)	Finland	Lappi	19090330	1 (1)
ow91	ow91	Canis lupus		museum (nerval tissue from tooth)	Finland	Lappi	19091208	1 (1)	0.996	1			wolf qi = 1.00	wolf qi = 1.00
ow99	ow99_1	Canis lupus		museum (nerval tissue from tooth)	Finland	Kymen laakso	19581225	1 (2)	1	1			wolf qi = 1.00	wolf qi = 1.00
ow99	ow99_2	Canis lupus		museum (nerval tissue from tooth)	Finland	Kymen laakso	19581225	1 (2)	1	1			wolf qi = 1.00	wolf qi = 1.00
ow26	ow26	Canis lupus		museum (piece of ear)	Finland	Kontuselkä	19751231	1 (2)	1	1			wolf qi = 1.00	wolf qi = 1.00
ow26	ow26	Canis lupus		museum (piece of ear)	Finland	Kontuselkä	19751231	1 (2)	1	1			wolf qi = 1.00	wolf qi = 1.00
ow104	ow104_1	Canis lupus		museum (tissue from tooth)	Finland	Uusimaa	18540900	1 (2)	0.999	0.98			wolf qi = 1.00	wolf qi = 1.00
ow104	ow104_2	Canis lupus		museum (tissue from tooth)	Finland	Uusimaa	18540900	1 (2)	0.999	0.98			wolf qi = 1.00	wolf qi = 1.00
ow1	ow1_1	Canis lupus		museum (tooth with some blood)	Finland	Pohjois-Pohjanmaa	19781105	1 (2)	1	1			wolf qi = 1.00	wolf qi = 1.00
ow1	ow1_2	Canis lupus		museum (tooth with some blood)	Finland	Pohjois-Pohjanmaa	19781105	1 (2)	1	1			wolf qi = 1.00	wolf qi = 1.00
ow14	ow14	Canis lupus		museum (tooth)	Finland	Etelä-Pohjanmaa	19780316	1 (1)	1	1			wolf qi = 1.00	wolf qi = 1.00
ow36	ow36	Canis lupus		museum (tooth)	Finland	Pohjois-Savo	19371214	1 (1)	0.9864	1			wolf qi = 1.00	wolf qi = 1.00
ow53	ow53	Canis lupus		museum (tooth)	Finland	Lappi	19910228	1 (1)	1	0.98			wolf qi = 1.00	wolf qi = 1.00
ow61	ow61	Canis lupus		museum (tooth)	Finland	Uusimaa	19840213	1 (1)	1	1			wolf qi = 1.00	wolf qi = 1.00
ow62	ow62	Canis lupus		museum (tooth)	Finland	Lappi	19910221	1 (1)	1	1			wolf qi = 1.00	wolf qi = 1.00
ow78	ow78	Canis lupus		museum (tooth)	Finland	Lappi	19050321	1 (1)	0.996	0.98			wolf qi = 1.00	wolf qi = 1.00
ow85 *	ow85 *	Canis lupus		museum (tooth)	Finland	Salmi	19080121	1 (1)
ow95	ow95_1	Canis lupus		museum (tooth)	Finland	Pohjois-Pohjanmaa	19340300	1 (2)	0.998	1			wolf qi = 1.00	wolf qi = 1.00
ow95	ow95_2	Canis lupus		museum (tooth)	Finland	Pohjois-Pohjanmaa	19340300	1 (2)	0.998	1			wolf qi = 1.00	wolf qi = 1.00
ow97 *	ow97 *	Canis lupus		museum (tooth)	Finland	Pohjois-Karjala	19461105	2 (2)
GW260m	W160043	Canis lupus		saliva swab from kill	Germany	Niedersachsen	20160102	2 (2)	1	0.99			wolf qi = 1.00	wolf qi = 1.00
GW294m	W161873	Canis lupus		saliva swab from kill	Germany	Sachsen	20160830	2 (2)	0.9998	1			wolf qi = 1.00	wolf qi = 1.00
GW332f	WF627	Canis lupus		saliva swab from kill	Germany	Sachsen-Anhalt	20150113	3 (6)	1	1			wolf qi = 1.00	wolf qi = 1.00
GW458m	W151088	Canis lupus	immigrant from the Alpine population	saliva swab from kill	Germany	Niedersachsen	20150807	2 (2)	0.9828		0.993		wolf qi = 0.99–1.00		wolf qi = 1.00
GW635m	W161812	Canis lupus	immigrant from the Alpine population	saliva swab from kill	Germany	Bayern	20161109	2 (2)	0.9838		0.992		wolf qi = 0.99–1.00		wolf qi = 1.00
GW647f	W161962	Canis lupus		saliva swab from kill	Germany	Niedersachsen	20161119	2 (2)	1	1			wolf qi = 1.00	wolf qi = 1.00
GW661m	WE090 *	Canis lupus	immigrant from the Alpine population	saliva swab from kill	Germany	Bayern	20140322	1 (3)
GW661m	WE091 *	Canis lupus	immigrant from the Alpine population	saliva swab from kill	Germany	Bayern	20140322	1 (3)
GW661m	WE093	Canis lupus	immigrant from the Alpine population	saliva swab from kill	Germany	Bayern	20140322	1 (3)	0.998		1		wolf qi = 1.00		wolf qi = 1.00
GW006f	WE136 *	Canis lupus		scat	Germany	Sachsen	20040106	2 (4)
GW006f	WE139 *	Canis lupus		scat	Germany	Sachsen	20040117	2 (4)
GW096m	WF251	Canis lupus		scat	Germany	Sachsen	20150120	2 (2)	0.999	1			wolf qi = 1.00	wolf qi = 1.00
GW104m	W160854	Canis lupus		scat	Germany	Sachsen	20160302	2 (2)	1	1			wolf qi = 1.00	wolf qi = 1.00
GW114f	W161853a	Canis lupus		scat	Germany	Sachsen	20160506	2 (2)	0.999	1			wolf qi = 1.00	wolf qi = 1.00
GW146m	W161067	Canis lupus		scat	Germany	Brandenburg	20160329	2 (2)	0.998	1			wolf qi = 1.00	wolf qi = 1.00
GW173f	WE245	Canis lupus		scat	Germany	Sachsen	20131003	3 (6)	1	1			wolf qi = 1.00	wolf qi = 1.00
GW178f	W160794	Canis lupus		scat	Germany	Sachsen	20151210	2 (4)	1	1			wolf qi = 1.00	wolf qi = 1.00
GW178f	W160795	Canis lupus		scat	Germany	Sachsen	20151210	2 (4)	1	1			wolf qi = 1.00	wolf qi = 1.00
GW239f	WE471	Canis lupus		scat	Germany	Sachsen-Anhalt	20140131	3 (9)	1	1			wolf qi = 1.00	wolf qi = 1.00
GW317m	W160502	Canis lupus		scat	Germany	Niedersachsen	20160126	2 (2)	1	1			wolf qi = 1.00	wolf qi = 1.00
GW340f	W160602	Canis lupus		scat	Germany	Sachsen-Anhalt	20151221	2 (2)	1	1			wolf qi = 1.00	wolf qi = 1.00
GW366f	WF275	Canis lupus		scat	Germany	Niedersachsen	20150116	3 (6)	1	1			wolf qi = 1.00	wolf qi = 1.00
GW381m	W160835	Canis lupus		scat	Germany	Sachsen	20160118	2 (2)	1	1			wolf qi = 1.00	wolf qi = 1.00
GW391m	WF224	Canis lupus		scat	Germany	Sachsen	20141230	3 (6)	1	1			wolf qi = 1.00	wolf qi = 1.00
GW396f	WF166	Canis lupus		scat	Germany	Sachsen	20140512	1 (1)	1	1			wolf qi = 1.00	wolf qi = 1.00
GW419m	WF671	Canis lupus		scat	Germany	Sachsen-Anhalt	20150306	1 (1)	1	1			wolf qi = 1.00	wolf qi = 1.00
GW472f	W151440	Canis lupus		scat	Germany	Niedersachsen	20151019	2 (2)	1	1			wolf qi = 1.00	wolf qi = 1.00
GW492m	W150788	Canis lupus		scat	Germany	Brandenburg	20150114	1 (4)	1	0.99			wolf qi = 1.00	wolf qi = 1.00
GW493f	W150758	Canis lupus		scat	Germany	Brandenburg	20150205	1 (2)	1	1			wolf qi = 1.00	wolf qi = 1.00
GW550m	W150836	Canis lupus		scat	Germany	Brandenburg	20141105	2 (2)	0.997	0.99			wolf qi = 1.00	wolf qi = 1.00
GW614m	W161735	Canis lupus		scat	Germany	Sachsen-Anhalt	20160503	2 (2)	0.999	1			wolf qi = 1.00	wolf qi = 1.00
RW019f	W160119	Canis lupus		scat	Romania	Herculian	20160111	1 (1)	0.984	0.98			wolf qi = 1.00	wolf qi = 1.00
RW026m	W160121	Canis lupus		scat	Romania	Putna Vrancea	20160113	1 (1)	0.97	0.97			wolf qi = 0.91–0.99	wolf qi = 0.91–0.99
RW026m	W160123	Canis lupus		scat	Romania	Putna Vrancea	20160113	1 (1)	0.97	0.97			wolf qi = 0.91–0.99	wolf qi = 0.91–0.99
RW027m	W160100	Canis lupus		scat	Romania	Harghita Madaras	20151205	1 (1)	0.9996	1			wolf qi = 1.00	wolf qi = 1.00
RW028f	W160124	Canis lupus		scat	Romania	Harghita Madaras	20160115	1 (1)	0.983	0.98			wolf qi = 1.00	wolf qi = 1.00
RW029f	W160125	Canis lupus		scat	Romania	Harghita Madaras	20160115	1 (1)	0.999	1			wolf qi = 1.00	wolf qi = 1.00
RW030m	W160127	Canis lupus		scat	Romania	Harghita Madaras	20160119	1 (1)	0.9988	1			wolf qi = 1.00	wolf qi = 1.00
RW030m	W160470	Canis lupus		scat	Romania	Harghita Madaras	20160222	1 (1)	0.9988	1			wolf qi = 1.00	wolf qi = 1.00
RW031m	W160472	Canis lupus		scat	Romania	Harghita Madaras	20160222	1 (1)	1	1			wolf qi = 1.00	wolf qi = 1.00
RW040f	W160101	Canis lupus		scat	Romania	Harghita Madaras	20151205	1 (1)	0.9988	1			wolf qi = 1.00	wolf qi = 1.00
RW040f	W160496	Canis lupus		scat	Romania	Harghita Madaras	20160302	1 (1)	1	1			wolf qi = 1.00	wolf qi = 1.00
RW042m	W160115 *	Canis lupus		scat	Romania	Herculian	20160111	1 (1)
RW043m	W160117 *	Canis lupus		scat	Romania	Herculian	20160111	1 (1)
RW045m	W160126	Canis lupus		scat	Romania	Harghita Madaras	20160119	1 (1)	0.999	1			wolf qi = 1.00	wolf qi = 1.00
CL54	CL54	Canis lupus		tissue	Finland	Kainuu	20010125	1 (1)	1	1			wolf qi = 1.00	wolf qi = 1.00
CL98	CL98	Canis lupus		tissue	Finland	Kainuu	19980106	2 (2)	0.9998	1			wolf qi = 1.00	wolf qi = 1.00
CL104	CL104	Canis lupus		tissue	Finland	Pohjois-Karjala	19970210	2 (2)	0.999	1			wolf qi = 1.00	wolf qi = 1.00
CL195	CL195	Canis lupus		tissue	Finland	Pohjois-Savo	20070218	1 (1)	0.9998	1			wolf qi = 1.00	wolf qi = 1.00
CL245	CL245	Canis lupus		tissue	Finland	Etelä-Savo	20080116	1 (1)	0.9998	1			wolf qi = 1.00	wolf qi = 1.00
CL253	CL253	Canis lupus		tissue	Finland	Kainuu	20080213	1 (1)	0.998	1			wolf qi = 1.00	wolf qi = 1.00
CL280	CL280	Canis lupus		tissue	Finland	Oulu	20091116	2 (2)	0.998	1			wolf qi = 1.00	wolf qi = 1.00
CL297	CL297	Canis lupus		tissue	Finland	Lappi	20100130	1 (1)	1	1			wolf qi = 1.00	wolf qi = 1.00
CL317	CL317	Canis lupus		tissue	Finland	Lappi	20110105	2 (2)	1	1			wolf qi = 1.00	wolf qi = 1.00
CL407	CL407	Canis lupus		tissue	Finland	Kainuu	20070410	2 (2)	1	1			wolf qi = 1.00	wolf qi = 1.00
CL330	CL330	Canis lupus		tissue	Finland	Etelä-Savo	20110422	2 (2)	1	1			wolf qi = 1.00	wolf qi = 1.00
CL332	CL332	Canis lupus		tissue	Finland	Kainuu	20111122	2 (2)	0.999	1			wolf qi = 1.00	wolf qi = 1.00
CL356	CL356	Canis lupus		tissue	Finland	Kainuu	20120317	2 (2)	1	1			wolf qi = 1.00	wolf qi = 1.00
CL363	CL363	Canis lupus		tissue	Finland	Varsinais-Suomi	20120115	1 (1)	0.999	1			wolf qi = 1.00	wolf qi = 1.00
CL364	CL364	Canis lupus		tissue	Finland	Pohjois-Karjala	20111224	2 (2)	0.999	0.99			wolf qi = 1.00	wolf qi = 1.00
CL418	CL418	Canis lupus		tissue	Finland	Lappi	20151117	1 (1)	1	1			wolf qi = 1.00	wolf qi = 1.00
LA1-82	LA1-82	Canis lupus		tissue	Finland	Lappi	19820000	1 (1)	0.9998	1			wolf qi = 1.00	wolf qi = 1.00
PK1010-85	PK1010-85	Canis lupus		tissue	Finland	Pohjois-Karjala	19850000	1 (1)	0.999	1			wolf qi = 1.00	wolf qi = 1.00
pk1011-85	pk1011-85	Canis lupus		tissue	Finland	Pohjois-Karjala	19850000	1 (1)	1	0.99			wolf qi = 1.00	wolf qi = 1.00
PK1042-87	PK1042-87	Canis lupus		tissue	Finland	Pohjois-Karjala	19870000	1 (1)	0.9978	1			wolf qi = 1.00	wolf qi = 1.00
pk1050-84	pk1050-84	Canis lupus		tissue	Finland	Pohjois-Karjala	19840000	1 (1)	1	1			wolf qi = 1.00	wolf qi = 1.00
pk1141-85	pk1141-85	Canis lupus		tissue	Finland	Pohjois-Karjala	19850000	1 (1)	0.999	1			wolf qi = 1.00	wolf qi = 1.00
PK1201-83	PK1201-83	Canis lupus		tissue	Finland	Pohjois-Karjala	19830000	1 (1)	1	1			wolf qi = 1.00	wolf qi = 1.00
pk1202-83	pk1202-83	Canis lupus		tissue	Finland	Pohjois-Karjala	19830000	1 (1)	0.999	1			wolf qi = 1.00	wolf qi = 1.00
PK1256-83	PK1256-83	Canis lupus		tissue	Finland	Pohjois-Karjala	19830000	1 (1)	1	1			wolf qi = 1.00	wolf qi = 1.00
PK1261-84	PK1261-84	Canis lupus		tissue	Finland	Pohjois-Karjala	19840000	1 (1)	0.9996	1			wolf qi = 1.00	wolf qi = 1.00
pk1329-84	pk1329-84	Canis lupus		tissue	Finland	Pohjois-Karjala	19840000	1 (1)	1	1			wolf qi = 1.00	wolf qi = 1.00
PK1330-84	PK1330-84	Canis lupus		tissue	Finland	Pohjois-Karjala	19840000	1 (1)	1	1			wolf qi = 1.00	wolf qi = 1.00
PK1331-84	PK1331-84	Canis lupus		tissue	Finland	Pohjois-Karjala	19840000	1 (1)	1	1			wolf qi = 1.00	wolf qi = 1.00
PK1337-84	PK1337-84	Canis lupus		tissue	Finland	Pohjois-Karjala	19840000	1 (1)	0.999	1			wolf qi = 1.00	wolf qi = 1.00
PS1204-83	PS1204-83	Canis lupus		tissue	Finland	Pohjois-Savo	19830000	1 (1)	1	1			wolf qi = 1.00	wolf qi = 1.00
GW028f	W080550	Canis lupus		tissue	Germany	Sachsen	20080923	1 (1)	1	1			wolf qi = 1.00	wolf qi = 1.00
GW037m	W151108	Canis lupus		tissue	Germany	Niedersachsen	20150330	1 (1)	1	1			wolf qi = 1.00	wolf qi = 1.00
GW075f	W1204	Canis lupus		tissue	Germany	Sachsen	20110221	2 (2)	0.9998	1			wolf qi = 1.00	wolf qi = 1.00
GW105m	W140100	Canis lupus		tissue	Germany	Sachsen	20140328	1 (3)	1	0.98			wolf qi = 1.00	wolf qi = 1.00
GW128m	W150935	Canis lupus		tissue	Germany	Brandenburg	20150329	1 (1)	0.998	1			wolf qi = 1.00	wolf qi = 1.00
GW143f	W110964	Canis lupus		tissue	Germany	Brandenburg	20110227	1 (1)	0.999	1			wolf qi = 1.00	wolf qi = 1.00
GW169f	WE184	Canis lupus		tissue	Germany	Brandenburg	20140207	2 (2)	1	1			wolf qi = 1.00	wolf qi = 1.00
GW173f	W160348	Canis lupus		tissue	Germany	Sachsen	20160213	3 (6)	1	1			wolf qi = 1.00	wolf qi = 1.00
GW185f	W161032	Canis lupus		tissue	Germany	Brandenburg	20160508	1 (1)	0.9998	1			wolf qi = 1.00	wolf qi = 1.00
GW203f	W161747	Canis lupus		tissue	Germany	Niedersachsen	20160925	1 (1)	0.989	0.99			wolf qi = 1.00	wolf qi = 1.00
GW208m	WD573	Canis lupus		tissue	Germany	Sachsen-Anhalt	20131119	2 (2)	1	1			wolf qi = 1.00	wolf qi = 1.00
GW212m	WE002	Canis lupus		tissue	Germany	Sachsen	20140102	2 (2)	0.999	1			wolf qi = 1.00	wolf qi = 1.00
GW232m	WE004_AL	Canis lupus		tissue	Germany	Brandenburg	20140104	2 (2)	1	1			wolf qi = 1.00	wolf qi = 1.00
GW234m	W140006	Canis lupus		tissue	Germany	Sachsen-Anhalt	20131214	1 (1)	0.999	1			wolf qi = 1.00	wolf qi = 1.00
GW239f	WF666	Canis lupus		tissue	Germany	Sachsen-Anhalt	20150304	3 (9)	1	1			wolf qi = 1.00	wolf qi = 1.00
GW251f	WD572	Canis lupus		tissue	Germany	Brandenburg	20131102	2 (2)	1	1			wolf qi = 1.00	wolf qi = 1.00
GW252m	WD571	Canis lupus		tissue	Germany	Brandenburg	20131110	2 (2)	1	1			wolf qi = 1.00	wolf qi = 1.00
GW254m	W140005	Canis lupus		tissue	Germany	Brandenburg	20131217	1 (1)	1	1			wolf qi = 1.00	wolf qi = 1.00
GW255f	WE003	Canis lupus		tissue	Germany	Brandenburg	20131223	1 (1)	1	1			wolf qi = 1.00	wolf qi = 1.00
GW266f	WE453	Canis lupus		tissue	Germany	Sachsen	20140713	1 (1)	0.9994	1			wolf qi = 1.00	wolf qi = 1.00
GW268m	WE452	Canis lupus		tissue	Germany	Sachsen	20140616	2 (2)	1	1			wolf qi = 1.00	wolf qi = 1.00
GW271f	WE183	Canis lupus		tissue	Germany	Brandenburg	20140204	2 (2)	0.9998	1			wolf qi = 1.00	wolf qi = 1.00
GW315m	W140150	Canis lupus		tissue	Germany	Brandenburg	20140420	1 (1)	0.963	0.97			wolf qi = 0.95–0.99	wolf qi = 0.97–1.00
GW318m	W140151	Canis lupus		tissue	Germany	Brandenburg	20140422	1 (1)	0.998	0.99			wolf qi = 1.00	wolf qi = 1.00
GW319m	W140154	Canis lupus		tissue	Germany	Brandenburg	20140404	1 (1)	1	1			wolf qi = 1.00	wolf qi = 1.00
GW331m	W161327	Canis lupus		tissue	Germany	Brandenburg	20160305	1 (1)	1	1			wolf qi = 1.00	wolf qi = 1.00
GW332f	W150934	Canis lupus		tissue	Germany	Brandenburg	20150222	3 (6)	0.9996	1			wolf qi = 1.00	wolf qi = 1.00
GW354f	WF055	Canis lupus		tissue	Germany	Brandenburg	20141228	1 (1)	1	1			wolf qi = 1.00	wolf qi = 1.00
GW360m	WF389	Canis lupus		tissue	Germany	Schleswig-Holstein	20150310	1 (1)	1	1			wolf qi = 1.00	wolf qi = 1.00
GW364m	WF267	Canis lupus		tissue	Germany	Niedersachsen	20150131	1 (1)	1	1			wolf qi = 1.00	wolf qi = 1.00
GW365f	WF314	Canis lupus		tissue	Germany	Sachsen	20150215	1 (1)	1	1			wolf qi = 1.00	wolf qi = 1.00
GW366f	W160071	Canis lupus		tissue	Germany	Niedersachsen	20160126	3 (6)	1	1			wolf qi = 1.00	wolf qi = 1.00
GW368m	WF534	Canis lupus		tissue	Germany	Niedersachsen	20150415	1 (1)	1	1			wolf qi = 1.00	wolf qi = 1.00
GW370m	WF090	Canis lupus		tissue	Germany	Niedersachsen	20150110	1 (1)	1	1			wolf qi = 1.00	wolf qi = 1.00
GW372m	WF488	Canis lupus		tissue	Germany	Hessen	20150421	1 (1)	1	1			wolf qi = 1.00	wolf qi = 1.00
GW378m	W140716	Canis lupus		tissue	Germany	Sachsen	20140910	1 (1)	1	1			wolf qi = 1.00	wolf qi = 1.00
GW391m	WF395	Canis lupus		tissue	Germany	Sachsen	20150309	3 (6)	1	1			wolf qi = 1.00	wolf qi = 1.00
GW424m	WF937	Canis lupus	immigrant from the Alpine population	tissue	Germany	Baden-Württemberg	20150622	2 (2)	0.9618		0.996		wolf qi = 0.84–0.97		wolf qi = 1.00
GW425f	W160770	Canis lupus		tissue	Germany	Sachsen-Anhalt	20160315	1 (1)	0.9994	1			wolf qi = 1.00	wolf qi = 1.00
GW435m	W151075	Canis lupus		tissue	Germany	Niedersachsen	20150516	1 (1)	0.999	1			wolf qi = 1.00	wolf qi = 1.00
GW451m	WF082	Canis lupus		tissue	Germany	Brandenburg	20150106	1 (1)	0.999	1			wolf qi = 1.00	wolf qi = 1.00
GW452m	W150976	Canis lupus		tissue	Germany	Sachsen	20150726	3 (6)	1	1			wolf qi = 1.00	wolf qi = 1.00
GW455m	W150962	Canis lupus		tissue	Germany	Sachsen	20150625	1 (1)	1	1			wolf qi = 1.00	wolf qi = 1.00
GW469m	W151200	Canis lupus		tissue	Germany	Niedersachsen	20150928	1 (1)	1	1			wolf qi = 1.00	wolf qi = 1.00
GW470m	W151506	Canis lupus	immigrant from the Alpine population	tissue	Germany	Niedersachsen	20151127	2 (2)	0.999		1		wolf qi = 1.00		wolf qi = 1.00
GW474m	W160001	Canis lupus		tissue	Germany	Niedersachsen	20151016	1 (1)	0.999	1			wolf qi = 1.00	wolf qi = 1.00
GW475m	W160002	Canis lupus		tissue	Germany	Niedersachsen	20151126	1 (1)	0.9998	1			wolf qi = 1.00	wolf qi = 1.00
GW478f	W160421	Canis lupus		tissue	Germany	Thüringen	20160311	1 (1)	0.9992	1			wolf qi = 1.00	wolf qi = 1.00
GW479m	W160349	Canis lupus		tissue	Germany	Sachsen	20160228	3 (6)	0.975	0.98			wolf qi = 0.98–1.00	wolf qi = 1.00
GW480m	W160347	Canis lupus		tissue	Germany	Sachsen	20151221	1 (1)	1	1			wolf qi = 1.00	wolf qi = 1.00
GW485m	W140377	Canis lupus		tissue	Germany	Niedersachsen	20081215	1 (1)	1	1			wolf qi = 0.99–1.00	wolf qi = 1.00
GW489m	WB050	Canis lupus	immigrant from the Alpine population	tissue	Germany	Hessen	20120423	2 (2)	0.97		0.9806		wolf qi = 0.85–0.99		wolf qi = 1.00
GW490m	WA215b	Canis lupus		tissue	Germany	Hessen	20100101	1 (4)	1	1			wolf qi = 1.00	wolf qi = 1.00
GW490m	WA216	Canis lupus		tissue	Germany	Hessen	20100101	1 (4)	1	1			wolf qi = 1.00	wolf qi = 1.00
GW492m	W151431	Canis lupus		tissue	Germany	Niedersachsen	20151006	3 (4)	1	0.99			wolf qi = 1.00	wolf qi = 1.00
GW493f	W150936	Canis lupus		tissue	Germany	Brandenburg	20150409	1 (2)	1	1			wolf qi = 1.00	wolf qi = 1.00
GW498f	W160416	Canis lupus		tissue	Germany	Brandenburg	20151010	1 (1)	0.999	1			wolf qi = 1.00	wolf qi = 1.00
GW499f	W160417	Canis lupus		tissue	Germany	Brandenburg	20151026	1 (1)	0.9994	1			wolf qi = 1.00	wolf qi = 1.00
GW500m	W160418	Canis lupus		tissue	Germany	Brandenburg	20151026	1 (1)	1	1			wolf qi = 1.00	wolf qi = 1.00
GW501m	W160419	Canis lupus		tissue	Germany	Brandenburg	20151218	1 (1)	0.999	1			wolf qi = 1.00	wolf qi = 1.00
GW502m	W160566	Canis lupus		tissue	Germany	Sachsen-Anhalt	20150510	1 (1)	1	1			wolf qi = 1.00	wolf qi = 1.00
GW503m	W160636	Canis lupus		tissue	Germany	Niedersachsen	20160409	1 (1)	1	1			wolf qi = 1.00	wolf qi = 1.00
GW513m	W161321	Canis lupus		tissue	Germany	Brandenburg	20160127	1 (1)	0.9996	1			wolf qi = 1.00	wolf qi = 1.00
GW520m	W161017	Canis lupus		tissue	Germany	Hessen	20160506	1 (1)	1	1			wolf qi = 1.00	wolf qi = 1.00
GW560f	W161392	Canis lupus		tissue	Germany	Sachsen	20160709	1 (1)	0.999	1			wolf qi = 0.98–1.00	wolf qi = 1.00
GW561m	W161391	Canis lupus	immigrant from the Alpine population	tissue	Germany	Bayern	20160525	1 (1)	0.977		0.9968		wolf qi = 1.00		wolf qi = 1.00
GW601f	W170046	Canis lupus		tissue	Germany	Brandenburg	20161201	1 (1)	1	1			wolf qi = 1.00	wolf qi = 1.00
GW602f	W161323	Canis lupus		tissue	Germany	Brandenburg	20160210	1 (1)	1	1			wolf qi = 1.00	wolf qi = 1.00
GW603f	W161322	Canis lupus		tissue	Germany	Brandenburg	20160210	1 (1)	0.9998	1			wolf qi = 1.00	wolf qi = 1.00
GW604m	W161319	Canis lupus		tissue	Germany	Brandenburg	20160118	1 (1)	1	1			wolf qi = 1.00	wolf qi = 1.00
GW605m	W161320	Canis lupus		tissue	Germany	Brandenburg	20160125	1 (1)	1	1			wolf qi = 1.00	wolf qi = 1.00
GW606f	W161324	Canis lupus		tissue	Germany	Brandenburg	20160214	1 (1)	1	1			wolf qi = 1.00	wolf qi = 1.00
GW607f	W161325	Canis lupus		tissue	Germany	Brandenburg	20160215	1 (1)	1	1			wolf qi = 1.00	wolf qi = 1.00
GW627m	W161704	Canis lupus		tissue	Germany	Sachsen	20161019	1 (1)	0.996	1			wolf qi = 1.00	wolf qi = 1.00
GW628m	W161705	Canis lupus		tissue	Germany	Sachsen	20161024	1 (1)	0.999	1			wolf qi = 1.00	wolf qi = 1.00
GW636f	W161801	Canis lupus		tissue	Germany	Brandenburg	20160914	1 (1)	1	1			wolf qi = 1.00	wolf qi = 1.00
GW646f	W161800 *	Canis lupus		tissue	Germany	Brandenburg	20160910	1 (1)
GW648f	W161909	Canis lupus		tissue	Germany	Sachsen	20161114	1 (1)	1	1			wolf qi = 1.00	wolf qi = 1.00
GW649m	W161961	Canis lupus		tissue	Germany	Sachsen	20161124	1 (1)	1	1			wolf qi = 1.00	wolf qi = 1.00
GW654m	W170045	Canis lupus		tissue	Germany	Brandenburg	20161129	1 (1)	1	1			wolf qi = 1.00	wolf qi = 1.00
GW655f	W170047	Canis lupus		tissue	Germany	Brandenburg	20161202	1 (1)	1	1			wolf qi = 1.00	wolf qi = 1.00
GW659f	W170091	Canis lupus		tissue	Germany	Niedersachsen	20161129	1 (1)	1	1			wolf qi = 1.00	wolf qi = 1.00
GW660f	W170092	Canis lupus		tissue	Germany	Niedersachsen	20161217	1 (1)	1	1			wolf qi = 1.00	wolf qi = 1.00
GW662m	W161802	Canis lupus		tissue	Germany	Brandenburg	20160822	1 (1)	1	1			wolf qi = 1.00	wolf qi = 1.00
TP1	W140227	Canis lupus		tissue	Germany	Zoo Berlin	20140514	1 (1)	0.98	0.97			wolf qi = 1.00	wolf qi = 0.99–1.00
TP2	W161401	Canis lupus		tissue	Germany	Zoo Poing Bayern	20160718	1 (1)	0.99	0.99			wolf qi = 1.00	wolf qi = 1.00
TP3	WF315	Canis lupus		tissue	Germany	Zoo Berlin	NA	1 (1)	0.98	0.97			wolf qi = 0.98–1.00	wolf qi = 0.96–1.00
TP4	WF316	Canis lupus		tissue	Germany	Zoo Berlin	NA	1 (1)	0.99	0.99			wolf qi = 1.00	wolf qi = 1.00
RO001	W151399	Canis lupus		tissue	Romania	Estelnic	20130227	2 (2)	0.996	1			wolf qi = 1.00	wolf qi = 1.00
RO002m	W151403	Canis lupus		tissue	Romania	Darnau	20140224	2 (2)	0.9852	0.99			wolf qi = 1.00	wolf qi = 1.00
RO003f	W151420	Canis lupus		tissue	Romania	Cormos	20150331	2 (2)	0.999	1			wolf qi = 1.00	wolf qi = 1.00
RO005m	W151412	Canis lupus		tissue	Romania	Doboli	20140330	2 (2)	1	1			wolf qi = 1.00	wolf qi = 1.00
RO006m	W151400 *	Canis lupus		tissue	Romania	Zagon	20130321	2 (2)
RO007	W151401	Canis lupus		tissue	Romania	Herculian	20140108	2 (2)	1	1			wolf qi = 1.00	wolf qi = 1.00
RO008	W151402	Canis lupus		tissue	Romania	Bradut	20140118	2 (2)	0.999	1			wolf qi = 1.00	wolf qi = 1.00
RO009m	W151405	Canis lupus		tissue	Romania	Estelnic	20140317	2 (2)	0.998	1			wolf qi = 1.00	wolf qi = 1.00
RO013m	W151411	Canis lupus		tissue	Romania	Petriceni	20140322	2 (2)	0.9818	0.98			wolf qi = 1.00	wolf qi = 1.00
RO016f	W151415 *	Canis lupus		tissue	Romania	Bodoc	20150117	2 (2)
RO018m	W151422	Canis lupus		tissue	Romania	FV Nereju	20110102	2 (2)	0.999	1			wolf qi = 1.00	wolf qi = 1.00
RO021m	W151425	Canis lupus		tissue	Romania	FV Nereju, Piatra Tojanului	20140329	2 (2)	0.9998	1			wolf qi = 1.00	wolf qi = 1.00
RO024f	W151429	Canis lupus		tissue	Romania	Zagon	20121011	1 (1)	0.9932	0.99			wolf qi = 1.00	wolf qi = 1.00
RO025m	W151430	Canis lupus		tissue	Romania	Petriceni	20121128	1 (1)	0.9998	1			wolf qi = 1.00	wolf qi = 1.00
V19	V19	Canis lupus		tissue	Russia	Karelia	19991211	2 (2)	0.999	1			wolf qi = 1.00	wolf qi = 1.00
V25	V25	Canis lupus		tissue	Russia	Archangel	20000100	2 (2)	0.997	1			wolf qi = 1.00	wolf qi = 1.00
V39	V39 *	Canis lupus		tissue	Russia	Karelia	20000200	2 (2)
V45	V45	Canis lupus		tissue	Russia	Karelia	20100000	2 (2)	0.999	1			wolf qi = 1.00	wolf qi = 1.00
V47	V47	Canis lupus		tissue	Russia	Karelia	20100000	1 (1)	1	1			wolf qi = 1.00	wolf qi = 1.00
GW105m	W1177	Canis lupus		urine	Germany	Sachsen	20120128	2 (3)	1	0.98			wolf qi = 1.00	wolf qi = 1.00
GW170m	W160906	Canis lupus		urine	Germany	Sachsen	20160123	2 (2)	0.999	1			wolf qi = 1.00	wolf qi = 1.00
GW237m	W150578	Canis lupus		urine	Germany	Sachsen-Anhalt	20150206	2 (2)	0.9998	1			wolf qi = 1.00	wolf qi = 1.00
GW239f	WE637	Canis lupus		urine	Germany	Sachsen-Anhalt	20140129	3 (9)	1	1			wolf qi = 1.00	wolf qi = 1.00
W162139	W162139	Canis lupus familiaris		blood	Germany	Bayern	20161215	2 (2)	0.0662	0.35	0.0794	0.0922	BC2d qi = 0.50–0.52, no qi ≥ 0.5 to any category	BC2d qi = 0.51, no qi ≥ 0.5 to any category	BC2d qi = 0.54–0.55, no qi ≥ 0.5 to any category	BC2d qi = 0.57–0.60, no qi ≥ 0.5 to any category
W162140	W162140	Canis lupus familiaris		blood	Germany	Bayern	20161215	2 (2)	0.0346	0.2926	0.0412	0.0568	dog qi = 0.57–0.59, no qi ≥ 0.5 to any category	dog qi = 0.55, no qi ≥ 0.5 to any category	dog qi = 0.56–0.58, no qi ≥ 0.5 to any category	no qi ≥ 0.5 to any category
Anouk	Anouk2	Canis lupus familiaris		buccal swap	Germany	Gelnhausen	20150000	5 (7)	0.002	0.045	0.003	0.0032	dog qi = 0.99–1.00	dog qi = 0.99–1.00	dog qi = 0.98–1.00	dog qi = 0.99–1.00
Balu	Balu2	Canis lupus familiaris		buccal swap	Germany	Gelnhausen	20150000	4 (5)	0.002	0.004	0.0032	0.0044	dog qi = 0.99–1.00	dog qi = 0.99–1.00	dog qi = 0.98–1.00	dog qi = 0.98–0.99
Bree	Bree2	Canis lupus familiaris		buccal swap	Germany	Gelnhausen	20150000	4 (5)	0.003	0.0126	0.004	0.0054	dog qi = 0.98–1.00	dog qi = 0.98–1.00	dog qi = 0.96–0.99	dog qi = 0.95–0.98
Cady	Cady2	Canis lupus familiaris		buccal swap	Germany	Gelnhausen	20150000	4 (5)	0.0022	0.002	0.0038	0.0054	dog qi = 0.98–1.00	dog qi = 0.98–1.00	dog qi = 0.97–0.99	dog qi = 0.96–0.99
Cosmo	Cosmo2	Canis lupus familiaris		buccal swap	Germany	Gelnhausen	20150000	4 (5)	0.003	0.006	0.0056	0.0072	dog qi = 0.98–1.00	dog qi = 0.98–1.00	dog qi = 0.96–0.99	dog qi = 0.95–0.99
Ella	Ella2	Canis lupus familiaris		buccal swap	Germany	Gelnhausen	20150000	4 (5)	0.0092	0.0046	0.0166	0.0214	dog qi = 0.86–0.95	dog qi = 0.88–0.96	dog qi = 0.76–0.89	dog qi = 0.72–0.85
Filou	Filou2	Canis lupus familiaris		buccal swap	Germany	Gelnhausen	20150000	5 (7	0.01	0.004	0.0148	0.023	dog qi = 0.84–0.94	dog qi = 0.86–0.94	dog qi = 0.80–0.92	dog qi = 0.71–0.85
Ginger	Ginger2	Canis lupus familiaris		buccal swap	Germany	Gelnhausen	20150000	5 (7	0.0078	0.0022	0.0122	0.0208	dog qi = 0.91–0.98	dog qi = 0.92–0.98	dog qi = 0.88–0.97	dog qi = 0.80–0.92
Gisela	Gisela2	Canis lupus familiaris		buccal swap	Germany	Gelnhausen	20150000	5 (7	0.002	0.0072	0.003	0.0044	dog qi = 0.99–1.00	dog qi = 0.99–1.00	dog qi = 0.98–1.00	dog qi = 0.97–0.99
Hermine	Hermine2	Canis lupus familiaris		buccal swap	Germany	Gelnhausen	20150000	4 (5)	0.0048	0.0084	0.0084	0.0088	dog qi = 0.95–0.99	dog qi = 0.96–1.00	dog qi = 0.91–0.97	dog qi = 0.91–0.97
Hugo	Hugo2	Canis lupus familiaris		buccal swap	Germany	Gelnhausen	20150000	4 (5)	0.008	0.002	0.0144	0.0158	dog qi = 0.86–0.95	dog qi = 0.88–0.95	dog qi = 0.77–0.90	dog qi = 0.78–0.89
Isi	Isi2	Canis lupus familiaris		buccal swap	Germany	Gelnhausen	20150000	4 (5)	0.023	0.0066	0.0338	0.0392	dog qi = 0.64–0.78	dog qi = 0.66–0.79	dog qi = 0.53–0.70	dog qi = 0.53–0.67
Janosch	Janosch	Canis lupus familiaris		buccal swap	Germany	Gelnhausen	20150000	3 (3)	0.0286	0.003	0.0472	0.05	dog qi = 0.64–0.79	dog qi = 0.69–0.82	dog qi = 0.50–0.63, no qi ≥ 0.5 to any category	dog qi = 0.50–0.65
Kensas	Kensas2	Canis lupus familiaris		buccal swap	Germany	Gelnhausen	20150000	4 (5)	0.002	0.0026	0.003	0.004	dog qi = 0.99–1.00	dog qi = 0.99–1.00	dog qi = 0.98–1.00	dog qi = 0.98–0.99
Kira	Kira2	Canis lupus familiaris		buccal swap	Germany	Gelnhausen	20150000	5 (7)	0.0018	0.0036	0.002	0.0032	dog qi = 0.99–1.00	dog qi = 0.99–1.00	dog qi = 0.99–1.00	dog qi = 0.98–1.00
Kisha	Kisha	Canis lupus familiaris		buccal swap	Germany	Gelnhausen	20150000	3 (3)	0.002	0.0046	0.0026	0.004	dog qi = 0.99–1.00	dog qi = 0.99–1.00	dog qi = 0.99–1.00	dog qi = 0.98–0.99
Laki	Laki	Canis lupus familiaris		buccal swap	Germany	Gelnhausen	20150000	3 (3)	0.1266	0.002	0.1458	0.1386	BC2d qi = 0.78–0.90	BC2d qi = 0.75–0.88	BC2d qi = 0.82–0.94	BC2d qi = 0.76–0.90
Maggy	Maggy2	Canis lupus familiaris		buccal swap	Germany	Gelnhausen	20150000	4 (5)	0.003	0.004	0.005	0.0054	dog qi = 0.98–1.00	dog qi = 0.99–1.00	dog qi = 0.96–0.99	dog qi = 0.96–0.99
Margaretha	Margaretha2	Canis lupus familiaris		buccal swap	Germany	Gelnhausen	20150000	4 (5)	0.0864	0.0046	0.1058	0.1058	BC2d qi = 0.62–0.76	BC2d qi = 0.59–0.73	BC2d qi = 0.66–0.81	BC2d qi = 0.59–0.76
Moesha	Moesha2	Canis lupus familiaris		buccal swap	Germany	Gelnhausen	20150000	5 (7	0.0322	0.0222	0.0262	0.0566	dog qi = 0.50–0.63	dog qi = 0.53, no qi ≥ 0.5 to any category	dog qi = 0.63–0.79	no qi ≥ 0.5 to any category
Nala	Nala	Canis lupus familiaris		buccal swap	Germany	Gelnhausen	20150000	3 (3)	0.003	0.2918	0.0046	0.0064	dog qi = 0.97–0.99	dog qi = 0.97–1.00	dog qi = 0.96–0.99	dog qi = 0.95–0.98
Phortos	Phortos2	Canis lupus familiaris		buccal swap	Germany	Gelnhausen	20150000	4 (5)	0.001	0.0066	0.002	0.003	dog qi = 1.00	dog qi = 1.00	dog qi = 0.99–1.00	dog qi = 0.99–1.00
Quinn	Quinn2	Canis lupus familiaris		buccal swap	Germany	Gelnhausen	20150000	4 (5)	0.0018	0.0588	0.0026	0.003	dog qi = 0.99–1.00	dog qi = 0.99–1.00	dog qi = 0.99–1.00	dog qi = 0.99–1.00
Rocco	Rocco2	Canis lupus familiaris		buccal swap	Germany	Gelnhausen	20150000	4 (5)	0.0878	0.0028	0.1084	0.1014	BC2d qi = 0.64–0.66, no qi ≥ 0.5 to any category	BC2d qi = 0.60, no qi ≥ 0.5 to any category	BC2d qi = 0.57–0.76	BC2d qi = 0.62–0.64, no qi ≥ 0.5 to any category
Seppel	Seppel2	Canis lupus familiaris		buccal swap	Germany	Gelnhausen	20150000	4 (5)	0.0208	0.0136	0.033	0.0362	dog qi = 0.76–0.89	dog qi = 0.77–0.89	dog qi = 0.66–0.83	dog qi = 0.66–0.81
Teo	Teo2	Canis lupus familiaris		buccal swap	Germany	Gelnhausen	20150000	5 (7)	0.002	0.0066	0.002	0.0034	dog qi = 0.99–1.00	dog qi = 0.99–1.00	dog qi = 0.99–1.00	dog qi = 0.98–0.99
Wilma	Wilma2	Canis lupus familiaris		buccal swap	Germany	Gelhausen	20150000	5 (7)	0.001	0.2832	0.0016	0.002	dog qi = 1.00	dog qi = 1.00	dog qi = 1.00	dog qi = 1.00
Knut	Knut2	Canis lupus familiaris		buccal swap	Germany	Gelnhausen	20150000	4 (5)	0.001	0.0076	0.002	0.003	dog qi = 1.00	dog qi = 1.00	dog qi = 1.00	dog qi = 0.99–1.00
Sl_WD1	X150266	Canis lupus familiaris	Saarloos wolfdog	hairs	Germany	Sachsen	20150831	1 (1)	0.2628	0.3418	0.2596	0.276	BC2d qi = 0.75–0.92	BC2d qi = 0.78–0.94	BC2d qi = 0.77–0.94	BC2d qi = 0.52–0.78
Sl_WD2	X150267	Canis lupus familiaris	Saarloos wolfdog	hairs	Germany	Sachsen	20150831	1 (1)	0.1844	0.2616	0.1944	0.1898	BC2d qi = 0.89–0.97	BC2d qi = 0.90–0.97	BC2d qi = 0.88–0.97	BC2d qi = 0.85–0.94
Cz_WD1	Nala_2	Canis lupus familiaris	Czechoslovakian wolfdog	saliva swab	Germany	Niedersachsen	20150825	1 (1)	0.3178	0.32	0.3342	0.3218	F2 qi = 0.54–0.55, BC1d qi = 0.64	BC1d qi = 0.75–0.76, no qi ≥ 0.5 to any category	F2 qi = 0.80–0.92	F2 qi = 0.57–0.83
Cz_WD2	Nanuk	Canis lupus familiaris	Czechoslovakian wolfdog	saliva swab	Germany	Niedersachsen	20150825	1 (1)	0.008	0.2546	0.016	0.0138	dog qi = 0.92–0.98	dog qi = 0.92–0.98	dog qi = 0.84–0.95	dog qi = 0.89–0.96
W161915	W161915	Canis lupus familiaris		saliva swab	Germany	Hessen	20161116	2 (2)	0.0614	0.231	0.08	0.0844	BC2d qi = 0.56–0.58, no qi ≥ 0.5 to any category	BC2d qi = 0.54, no qi ≥ 0.5 to any category	BC2d qi = 0.53–0.68	BC2d qi = 0.58–0.61, no qi ≥ 0.5 to any category
W161637	W161637	Canis lupus familiaris		saliva swab from kill	Germany	Niedersachsen	20160606	2 (2)	0.0294	0.295	0.0492	0.0544	dog qi = 0.50–0.63	dog qi = 0.56–0.67	no qi ≥ 0.5 to any category	no qi ≥ 0.5 to any category
Anouk	Anouk1	Canis lupus familiaris		scat	Germany	Gelnhausen	20150000	2 (7)	0.002	0.045	0.003	0.0032	dog qi = 0.99–1.00	dog qi = 0.99–1.00	dog qi = 0.98–1.00	dog qi = 0.99–1.00
Balu	Balu1	Canis lupus familiaris		scat	Germany	Gelnhausen	20150000	1 (5)	0.002	0.004	0.0032	0.0044	dog qi = 0.99–1.00	dog qi = 0.99–1.00	dog qi = 0.98–1.00	dog qi = 0.98–0.99
Bree	Bree1	Canis lupus familiaris		scat	Germany	Gelnhausen	20150000	1 (5)	0.003	0.0126	0.004	0.0054	dog qi = 0.98–1.00	dog qi = 0.98–1.00	dog qi = 0.96–0.99	dog qi = 0.95–0.98
Cady	Cady1	Canis lupus familiaris		scat	Germany	Gelnhausen	20150000	1 (5)	0.0022	0.002	0.0038	0.0054	dog qi = 0.98–1.00	dog qi = 0.98–1.00	dog qi = 0.97–0.99	dog qi = 0.96–0.99
Cosmo	Cosmo1	Canis lupus familiaris		scat	Germany	Gelnhausen	20150000	1 (5)	0.003	0.006	0.0056	0.0072	dog qi = 0.98–1.00	dog qi = 0.98–1.00	dog qi = 0.96–0.99	dog qi = 0.95–0.99
Ella	Ella1	Canis lupus familiaris		scat	Germany	Gelnhausen	20150000	1 (5)	0.0092	0.0046	0.0166	0.0214	dog qi = 0.86–0.95	dog qi = 0.88–0.96	dog qi = 0.76–0.89	dog qi = 0.72–0.85
Filou	Filou1	Canis lupus familiaris		scat	Germany	Gelnhausen	20150000	2 (7)	0.01	0.004	0.0148	0.023	dog qi = 0.84–0.94	dog qi = 0.86–0.94	dog qi = 0.80–0.92	dog qi = 0.71–0.85
Ginger	Ginger1	Canis lupus familiaris		scat	Germany	Gelnhausen	20150000	2 (7)	0.0078	0.0022	0.0122	0.0208	dog qi = 0.91–0.98	dog qi = 0.92–0.98	dog qi = 0.88–0.97	dog qi = 0.80–0.92
Gisela	Gisela1	Canis lupus familiaris		scat	Germany	Gelnhausen	20150000	2 (7)	0.002	0.0072	0.003	0.0044	dog qi = 0.99–1.00	dog qi = 0.99–1.00	dog qi = 0.98–1.00	dog qi = 0.97–0.99
Hermine	Hermine1	Canis lupus familiaris		scat	Germany	Gelnhausen	20150000	1 (5)	0.0048	0.0084	0.0084	0.0088	dog qi = 0.95–0.99	dog qi = 0.96–1.00	dog qi = 0.91–0.97	dog qi = 0.91–0.97
Hugo	Hugo1	Canis lupus familiaris		scat	Germany	Gelnhausen	20150000	1 (5)	0.008	0.002	0.0144	0.0158	dog qi = 0.86–0.95	dog qi = 0.88–0.95	dog qi = 0.77–0.90	dog qi = 0.78–0.89
Isi	Isi1	Canis lupus familiaris		scat	Germany	Gelnhausen	20150000	1 (5)	0.023	0.0066	0.0338	0.0392	dog qi = 0.64–0.78	dog qi = 0.66–0.79	dog qi = 0.53–0.70	dog qi = 0.53–0.67
Kensas	Kensas1	Canis lupus familiaris		scat	Germany	Gelnhausen	20150000	1 (5)	0.002	0.0026	0.003	0.004	dog qi = 0.99–1.00	dog qi = 0.99–1.00	dog qi = 0.98–1.00	dog qi = 0.98–0.99
Kira	Kira1	Canis lupus familiaris		scat	Germany	Gelnhausen	20150000	2 (7)	0.0018	0.0036	0.002	0.0032	dog qi = 0.99–1.00	dog qi = 0.99–1.00	dog qi = 0.99–1.00	dog qi = 0.98–1.00
Knut	Knut1	Canis lupus familiaris		scat	Germany	Gelnhausen	20150000	1 (5)	0.001	0.0076	0.002	0.003	dog qi = 1.00	dog qi = 1.00	dog qi = 1.00	dog qi = 0.99–1.00
Maggy	Maggy1	Canis lupus familiaris		scat	Germany	Gelnhausen	20150000	1 (5)	0.003	0.004	0.005	0.0054	dog qi = 0.98–1.00	dog qi = 0.99–1.00	dog qi = 0.96–0.99	dog qi = 0.96–0.99
Margaretha	Margaretha1	Canis lupus familiaris		scat	Germany	Gelnhausen	20150000	1 (5)	0.0864	0.0046	0.1058	0.1058	BC2d qi = 0.62–0.76	BC2d qi = 0.59–0.73	BC2d qi = 0.66–0.81	BC2d qi = 0.59–0.76
Moesha	Moesha1	Canis lupus familiaris		scat	Germany	Gelnhausen	20150000	2 (7)	0.0322	0.0222	0.0262	0.0566	dog qi = 0.50–0.63	dog qi = 0.53, no qi ≥ 0.5 to any category	dog qi = 0.63–0.79	no qi ≥ 0.5 to any category
Phortos	Phortos1	Canis lupus familiaris		scat	Germany	Gelnhausen	20150000	1 (5)	0.001	0.0066	0.002	0.003	dog qi = 1.00	dog qi = 1.00	dog qi = 0.99–1.00	dog qi = 0.99–1.00
Quinn	Quinn1	Canis lupus familiaris		scat	Germany	Gelnhausen	20150000	1 (5)	0.0018	0.0588	0.0026	0.003	dog qi = 0.99–1.00	dog qi = 0.99–1.00	dog qi = 0.99–1.00	dog qi = 0.99–1.00
Rocco	Rocco1	Canis lupus familiaris		scat	Germany	Gelnhausen	20150000	1 (5)	0.0878	0.0028	0.1084	0.1014	BC2d qi = 0.64–0.66, no qi ≥ 0.5 to any category	BC2d qi = 0.60, no qi ≥ 0.5 to any category	BC2d qi = 0.57–0.76	BC2d qi = 0.62–0.64, no qi ≥ 0.5 to any category
Seppel	Seppel1	Canis lupus familiaris		scat	Germany	Gelnhausen	20150000	1 (5)	0.0208	0.0136	0.033	0.0362	dog qi = 0.76–0.89	dog qi = 0.77–0.89	dog qi = 0.66–0.83	dog qi = 0.66–0.81
Teo	Teo1	Canis lupus familiaris		scat	Germany	Gelnhausen	20150000	2 (7)	0.002	0.0066	0.002	0.0034	dog qi = 0.99–1.00	dog qi = 0.99–1.00	dog qi = 0.99–1.00	dog qi = 0.98–0.99
Wilma	Wilma1	Canis lupus familiaris		scat	Germany	Gelhausen	20150000	2 (7)	0.001	0.2832	0.0016	0.002	dog qi = 1.00	dog qi = 1.00	dog qi = 1.00	dog qi = 1.00
W160815	W160815 *	Canis lupus familiaris		scat	Germany	Sachsen	20151021	2 (2)
Hund_BY	WD132b	Canis lupus familiaris		tissue	Germany	Bayern	20130311	2 (2)	0.0018	0.06	0.002	0.003	dog qi = 0.99–1.00	dog qi = 0.99–1.00	dog qi = 0.99–1.00	dog qi = 0.99–1.00
Krümel	W150978	Canis lupus familiaris		tissue	Germany	Niedersachsen	20150805	2 (2)	0.006	0.02	0.0096	0.0114	dog qi = 0.93–0.98	dog qi = 0.93–0.98	dog qi = 0.89–0.97	dog qi = 0.89–0.96
RD001m	X160100	Canis lupus familiaris		tissue	Romania	Herculian	20160128	2 (2)	0.0018	0.0036	0	0.0046	dog qi = 0.98–1.00	dog qi = 0.98–1.00	dog qi = 0.98–1.00	dog qi = 0.97–0.99
W160157	RO031m	Canis lupus familiaris		tissue	Romania	FV Patarlagele	20151108	1 (1)	0.1136	0.1206	0.1136	0.1238	BC2d qi = 0.79–0.91	BC2d qi = 0.80–0.91	BC2d qi = 0.76–0.89	BC2d qi = 0.74–0.88
K160677	K160677 *	Capra aegagrus hircus		hairs	Romania	Miercurea Nirajului	20160421	1 (1)
K160580	K160580 *	Capreolus capreolus		hairs	Romania	Ghindari	20160317	1 (1)
K160422	K160422 *	Cervus elaphus		hairs	Germany	Hessen	20160413	1 (1)
p1536	p1536 *	Cervus elaphus		tissue	Germany	Rheinland-Pfalz	20111025	2 (2)
K160448	K160448 *	Felis silvestris silvestris		hairs	Germany	Nordrhein-Westfalen	20160213	1 (1)
Dino	Dino *	Homo sapiens		saliva swab	Germany	Gelnhausen	20150000	1 (1)
BW_LL001m	Y150122 *	Lynx lynx		scat	Germany	Baden-Württemberg	20150125	1 (1)
K160679	K160679 *	Martes foina		hairs	Romania	Abud	20160512	1 (1)
FI605	FI605 *	Martes martes		hairs	Germany	Bayern	20140401	1 (1)
W151129	W151129 *	Ovis sp.		hairs	Germany	Niedersachsen	20150831	1 (1)
K160075	K160075 *	Ovis sp.		hairs	Romania	Rigmani	20151209	1 (1)
K160623	K160623 *	Procyon lotor		hairs	Germany	Hessen	20160422	1 (1)
K160387	K160387 *	Sus scrofa		hairs	Germany	Hessen	20160329	1 (1)
GW02xm	624a	suspected hybrid (Canis lupus x familiaris)		tissue	Germany	Große Waldbranddickung, FR Neustadt, Sachsen	20040131	1 (1)	0.55	0.54			F1 qi = 1.00	F1 qi = 1.00
GW05xf	W161925	suspected hybrid (Canis lupus x familiaris)		hairs	Czech Republic	Rumburg/Cunewalde	20161031	2 (2)	0.52	0.52			F1 qi = 1.00	F1 qi = 1.00
GW01xf	620	suspected hybrid (Canis lupus x familiaris)		hairs	Germany	Sachsen	20030906	1 (1)	0.57	0.56			F1 qi = 1.00	F1 qi = 1.00
CL370	CL370	suspected hybrid (Canis lupus x familiaris)		museum (bone)	Finland	Pirkanmaa	NA		0.53	0.52			F1 qi = 1.00	F1 qi = 1.00
GW01xf	WE138 *	suspected hybrid (Canis lupus x familiaris)		scat	Germany	Sachsen	20040113	2 (2)
GW03xm	WE133	suspected hybrid (Canis lupus x familiaris)		scat	Germany	Sachsen	20040129	2 (2)	0.55	0.54			F1 qi = 1.00	F1 qi = 1.00
CL307	CL307	suspected hybrid (Canis lupus x familiaris)		tissue	Finland	Kainuu	20100603	2 (2)	0.77	0.76			BC1w qi = 0.81–0.98	BC1w qi = 0.95–1.00
CL308	CL308	suspected hybrid (Canis lupus x familiaris)		tissue	Finland	Kainuu	20100603	2 (2)	0.84	0.83			BC2w qi = 0.98–0.99	BC2w qi = 0.95–0.97
CL309	CL309	suspected hybrid (Canis lupus x familiaris)		tissue	Finland	Kainuu	20100609	1 (1)	0.64	0.63			F2 qi = 1.00	F2 qi = 1.00
CL134	CL134	suspected hybrid (Canis lupus x familiaris)		tissue	Finland	E-Savo	20050107	1 (1)	0.56	0.55			F1 qi = 1.00	F1 qi = 1.00
CL419	CL419	suspected hybrid (Canis lupus x familiaris)		tissue	Finland	Oulu	20160124	1 (1)	0.9	0.89			BC2w qi = 0.74–0.92	BC2w qi = 0.89–0.97
CL420	CL420	suspected hybrid (Canis lupus x familiaris)		tissue	Finland	Pohjois-Karjala	20151229	1 (1)	0.92	0.92			BC2w qi = 0.59–0.64, BC3w qi = 0.81–0.84	BC2w qi = 0.70–0.71, BC3w qi = 0.76–0.77
RO022m	W151426	suspected hybrid (Canis lupus x familiaris)		tissue	Romania	FV Milcovelu	20141026	1 (1)	0.85	0.85			BC2w qi = 0.98–0.99	BC2w qi = 0.99–1.00
K160631	K160631	Vulpes vulpes		hairs	Germany	Hessen	20160426	1 (1)	0.99	0.96			wolf qi = 1.00	wolf qi = 1.00
K160634	K160634 *	Vulpes vulpes		hairs	Germany	Hessen	20160427	1 (1)
K160636	K160636	Vulpes vulpes		hairs	Germany	Hessen	20160427	1 (1)	0.99	0.96			wolf qi = 1.00	wolf qi = 1.00
W161285	W161285	Vulpes vulpes		tissue	Germany	Niedersachsen	20160527	2 (2)	0.99	0.96			wolf qi = 1.00	wolf qi = 1.00

## Sheet: Italian & Iberian wolf dataset
INDIVIDUAL ID	COUNTRY	YEAR	STRUCTURE K=2	STRUCTURE K=2 for wolves from Italy, immigrants from the Alpine population and dogs (qw)	STRUCTURE K=2 for wolves from Iberian Peninsula and dogs (qw)	NEWHYBRIDS for all wolves, hybrids, jackals, foxes and dogs	NEWHYBRIDS for wolves from Italy, immigrants from the Alpine population and dogs	NEWHYBRIDS for wolves from Iberian Peninsula and dogs
WIT1867	Italy	2015	0.999	0.999		wolf qi = 1.00	wolf qi = 1.00
WIT1866	Italy	2015	1	0.999		wolf qi = 1.00	wolf qi = 1.00
WIT1862	Italy	2014	0.999	0.999		wolf qi = 1.00	wolf qi = 1.00
WIT1818	Italy	2014	0.999	0.999		wolf qi = 1.00	wolf qi = 1.00
WIT1722	Italy	2014	0.999	0.999		wolf qi = 1.00	wolf qi = 1.00
WIT1721	Italy	2014	0.998	0.997		wolf qi = 1.00	wolf qi = 1.00
WIT1671	Italy	2014	0.998	0.997		wolf qi = 1.00	wolf qi = 1.00
WIT1669	Italy	2013	0.978	0.9856		wolf qi = 1.00	wolf qi = 1.00
WIT1667	Italy	2013	0.998	0.999		wolf qi = 1.00	wolf qi = 1.00
WIT1652	Italy	2013	0.995	0.999		wolf qi = 1.00	wolf qi = 1.00
WIT1649	Italy	2014	0.999	0.9916		wolf qi = 1.00	wolf qi = 1.00
WIT1648	Italy	2014	0.999	0.999		wolf qi = 1.00	wolf qi = 1.00
WIT1596	Italy	2013	0.999	0.999		wolf qi = 1.00	wolf qi = 1.00
WIT1595	Italy	2013	0.9996	0.999		wolf qi = 1.00	wolf qi = 1.00
WIT1576	Italy	2012	0.9958	0.9952		wolf qi = 1.00	wolf qi = 1.00
WIT1575	Italy	2011	0.999	0.997		wolf qi = 1.00	wolf qi = 1.00
WIT1560	Italy	2012	0.999	0.999		wolf qi = 1.00	wolf qi = 1.00
WIT1559	Italy	2012	0.999	0.999		wolf qi = 1.00	wolf qi = 1.00
WIT1558	Italy	2012	0.999	0.999		wolf qi = 1.00	wolf qi = 1.00
WIT1548	Italy	2010	0.999	0.999		wolf qi = 1.00	wolf qi = 1.00
WIT1546	Italy	2013	0.99	0.996		wolf qi = 1.00	wolf qi = 1.00
WIT1475	Italy	2013	0.999	0.999		wolf qi = 1.00	wolf qi = 1.00
WIT1461	Italy	2013	0.9898	0.994		wolf qi = 1.00	wolf qi = 1.00
WIT1457	Italy	2013	0.999	0.999		wolf qi = 1.00	wolf qi = 1.00
WIT1455	Italy	2013	0.999	0.999		wolf qi = 1.00	wolf qi = 1.00
WIT1454	Italy	2012	1	0.999		wolf qi = 1.00	wolf qi = 1.00
WIT1452	Italy	2012	0.964	0.9796		wolf qi = 0.85–0.98	wolf qi = 1.00
WIT1447	Italy	2012	0.999	0.999		wolf qi = 1.00	wolf qi = 1.00
WIT1446	Italy	2012	0.999	0.999		wolf qi = 1.00	wolf qi = 1.00
WIT1439	Italy	2012	0.9972	0.994		wolf qi = 1.00	wolf qi = 1.00
WIT1438	Italy	2012	0.999	0.999		wolf qi = 1.00	wolf qi = 1.00
WIT1435	Italy	2012	0.974	0.9866		wolf qi = 0.97–1.00	wolf qi = 1.00
WIT1305	Italy	2012	0.999	0.999		wolf qi = 1.00	wolf qi = 1.00
WIT1241	Italy	2012	0.996	0.999		wolf qi = 1.00	wolf qi = 1.00
WIT1236	Italy	2011	0.9942	0.9966		wolf qi = 1.00	wolf qi = 1.00
WIT1228	Italy	2011	0.9948	0.999		wolf qi = 1.00	wolf qi = 1.00
WIT1225	Italy	2011	0.999	0.999		wolf qi = 1.00	wolf qi = 1.00
WIT1223	Italy	2011	0.999	0.999		wolf qi = 1.00	wolf qi = 1.00
WIT1132	Italy	2011	0.999	0.999		wolf qi = 1.00	wolf qi = 1.00
WIT1123	Italy	2010	0.999	0.999		wolf qi = 1.00	wolf qi = 1.00
WIT1122	Italy	2010	0.999	0.999		wolf qi = 1.00	wolf qi = 1.00
WIT1113	Italy	2010	0.999	0.999		wolf qi = 1.00	wolf qi = 1.00
WIT1088	Italy	2010	0.998	0.999		wolf qi = 1.00	wolf qi = 1.00
WIT1086	Italy	2010	0.999	0.999		wolf qi = 1.00	wolf qi = 1.00
WIT1083	Italy	2009	0.998	0.999		wolf qi = 1.00	wolf qi = 1.00
WIT1080	Italy	2009	0.9908	0.999		wolf qi = 1.00	wolf qi = 1.00
WIT1074	Italy	2010	0.999	0.999		wolf qi = 1.00	wolf qi = 1.00
WIT1063	Italy	2009	0.9968	0.999		wolf qi = 1.00	wolf qi = 1.00
WIT1061	Italy	2009	0.999	0.999		wolf qi = 1.00	wolf qi = 1.00
WIT1052	Italy	2009	0.9788	0.986		wolf qi = 0.93–1.00	wolf qi = 1.00
WIT1050	Italy	2009	0.998	0.998		wolf qi = 1.00	wolf qi = 1.00
WIT0996	Italy	2008	0.999	0.999		wolf qi = 1.00	wolf qi = 1.00
WIT0979	Italy	2008	0.999	0.999		wolf qi = 1.00	wolf qi = 1.00
WIT0947	Italy	2007	0.9998	0.999		wolf qi = 1.00	wolf qi = 1.00
WIT0943	Italy	2007	1	0.999		wolf qi = 1.00	wolf qi = 1.00
WIT0939	Italy	2007	0.999	0.999		wolf qi = 1.00	wolf qi = 1.00
WIT0938	Italy	2007	0.9968	0.999		wolf qi = 1.00	wolf qi = 1.00
WIT0906	Italy	2006	0.999	0.999		wolf qi = 1.00	wolf qi = 1.00
WIT0590	Italy	2001	0.999	0.999		wolf qi = 1.00	wolf qi = 1.00
WIT0571	Italy	2001	0.999	0.999		wolf qi = 1.00	wolf qi = 1.00
WIT0085	Italy	1996	0.999	0.999		wolf qi = 1.00	wolf qi = 1.00
WIT0076	Italy	1991	0.999	0.999		wolf qi = 1.00	wolf qi = 1.00
WIT0073	Italy	1987	0.9994	0.999		wolf qi = 1.00	wolf qi = 1.00
WIT0070	Italy	1987	0.999	0.999		wolf qi = 1.00	wolf qi = 1.00
WIT0059	Italy	1992	0.9992	0.999		wolf qi = 1.00	wolf qi = 1.00
WIT0055	Italy	1992	0.999	0.999		wolf qi = 1.00	wolf qi = 1.00
WIT0050	Italy	1992	0.9998	0.999		wolf qi = 1.00	wolf qi = 1.00
WIT0040	Italy	1991	0.9928	0.99		wolf qi = 1.00	wolf qi = 1.00
WIT0028	Italy	1991	0.999	0.999		wolf qi = 1.00	wolf qi = 1.00
WIT0023	Italy	1991	0.999	0.999		wolf qi = 1.00	wolf qi = 1.00
WIB1857	Spain	2004	0.999		0.999	wolf qi = 1.00		wolf qi = 1.00
WIB1852	Spain	2004	0.994		0.9924	wolf qi = 1.00		wolf qi = 1.00
WIB1849	Spain	2003	0.997		0.999	wolf qi = 1.00		wolf qi = 1.00
WIB1847	Spain	2002	0.998		0.999	wolf qi = 1.00		wolf qi = 1.00
WIB1846	Spain	2002	0.995		0.999	wolf qi = 1.00		wolf qi = 1.00
WIB0552	Spain	2010	0.998		0.999	wolf qi = 1.00		wolf qi = 1.00
WIB0544	Spain	2012	0.997		0.999	wolf qi = 1.00		wolf qi = 1.00
WIB0543	Spain	2012	0.999		0.999	wolf qi = 1.00		wolf qi = 1.00
WIB0514	Spain	2010	0.9898		0.995	wolf qi = 1.00		wolf qi = 1.00
WIB0499	Portugal	2011	0.9968		0.997	wolf qi = 1.00		wolf qi = 1.00
WIB0474	Portugal	2010	0.9918		0.999	wolf qi = 1.00		wolf qi = 1.00
WIB0402	Portugal	2009	0.957		0.998	wolf qi = 0.89–0.98		wolf qi = 1.00
WIB0392	Portugal	2009	0.987		0.999	wolf qi = 1.00		wolf qi = 1.00
WIB0381	Spain	2008	0.997		0.998	wolf qi = 1.00		wolf qi = 1.00
WIB0377	Spain	2008	0.998		0.999	wolf qi = 1.00		wolf qi = 1.00
WIB0366	Spain	2008	0.999		0.999	wolf qi = 1.00		wolf qi = 1.00
WIB0363	Spain	2008	0.999		0.999	wolf qi = 1.00		wolf qi = 1.00
WIB0361	Spain	2007	0.999		0.999	wolf qi = 1.00		wolf qi = 1.00
WIB0359	Spain	2008	0.9364		0.971	wolf qi = 0.79–0.96		wolf qi = 1.00
WIB0353	Spain	2007	0.9908		0.9964	wolf qi = 1.00		wolf qi = 1.00
WIB0315	Spain	2007	0.999		0.999	wolf qi = 1.00		wolf qi = 1.00
WIB0213	Spain	2007	0.9942		0.999	wolf qi = 1.00		wolf qi = 1.00
WIB0125	Portugal	2006	0.9866		0.998	wolf qi = 1.00		wolf qi = 1.00
WIB0093	Portugal	2004	0.9982		0.999	wolf qi = 1.00		wolf qi = 1.00
WIB0090	Portugal	2004	0.9598		0.998	wolf qi = 0.82–0.97		wolf qi = 1.00

## Sheet: Illumina HDdog dataset
SAMPLE ID	DOG BREED	STRUCTURE K=2 for all samples (qd)	STRUCTURE K=2 for wolves from Central and Eastern Europe and dogs (qd)	STRUCTURE K=2 for wolves from Italy, immigrants from the Alpine population and dogs (qd)	STRUCTURE K=2 for wolves from Iberian Peninsula and dogs (qd)	NEWHYBRIDS for all wolves, hybrids, jackals, foxes and dogs hybrids, jackals, foxes and dogs	NEWHYBRIDS for wolves from Central and Eastern Europe, hybrids, jackals, foxes and dogs	NEWHYBRIDS for wolves from Italy, immigrants from the Alpine population and dogs	NEWHYBRIDS for wolves from Iberian Peninsula and dogs
AM079	Alaskan Malamute	0.7132	0.714	0.7124	0.7012	BC1d qi = 0.68–0.69, BC2d qi = 0.69–0.70	BC2d qi = 0.61–0.76	BC1d qi = 0.68–0.69, BC2d qi = 0.73	BC1d qi = 0.67–0.75, no qi ≥ 0.5 to any category
AM050	Alaskan Malamute	0.6392	0.6444	0.6274	0.636	F2 qi = 0.99–1.00	F2 qi = 0.99–1.00	F2 qi = 1.00	F2 qi = 1.00
AM059	Alaskan Malamute	0.713	0.7194	0.6946	0.7108	BC2d qi = 0.59–0.81	BC2d qi = 0.75–0.91	F2 qi = 0.63–0.66	BC2d qi = 0.60, no qi ≥ 0.5 to any category
AM075	Alaskan Malamute	0.6472	0.6496	0.6434	0.6412	F2 qi = 0.97–0.99	F2 qi = 0.96–0.98	F2 qi = 0.99–1.00	F2 qi = 0.99–1.00
AM154	Alaskan Malamute	0.5902	0.597	0.5774	0.5854	F2 qi = 1.00	F2 qi = 1.00	F2 qi = 1.00	F2 qi = 1.00
ACS222	American Cocker Spaniel	0.996	0.9894	0.9918	0.9916	dog qi = 0.97–0.99	dog qi = 0.98–0.99	dog qi = 0.93–0.98	dog qi = 0.94–0.98
ACS236	American Cocker Spaniel	0.999	0.996	0.998	0.997	dog qi = 1.00	dog qi = 1.00	dog qi = 0.99–1.00	dog qi = 0.99–1.00
ACS242	American Cocker Spaniel	0.999	0.6886	0.998	0.998	dog qi = 1.00	dog qi = 1.00	dog qi = 1.00	dog qi = 1.00
ACS245	American Cocker Spaniel	0.999	0.998	0.999	0.998	dog qi = 1.00	dog qi = 1.00	dog qi = 1.00	dog qi = 1.00
ACS033	American Cocker Spaniel	0.9972	0.982	0.996	0.9936	dog qi = 0.99–1.00	dog qi = 0.99–1.00	dog qi = 0.98–1.00	dog qi = 0.97–0.99
AKT003	American Hairless Terrier	0.999	0.999	0.998	0.998	dog qi = 1.00	dog qi = 1.00	dog qi = 1.00	dog qi = 1.00
AKT012	American Hairless Terrier	0.999	0.999	0.998	0.998	dog qi = 1.00	dog qi = 1.00	dog qi = 1.00	dog qi = 1.00
AKT044	American Hairless Terrier	0.9966	0.995	0.9948	0.9936	dog qi = 0.96–0.99	dog qi = 0.97–0.99	dog qi = 0.95–0.99	dog qi = 0.94–0.98
AKT046	American Hairless Terrier	0.998	0.997	0.997	0.9956	dog qi = 0.99–1.00	dog qi = 0.99–1.00	dog qi = 0.98–1.00	dog qi = 0.97–1.00
AKT055	American Hairless Terrier	0.999	0.999	0.9984	0.998	dog qi = 1.00	dog qi = 1.00	dog qi = 1.00	dog qi = 1.00
AUK014	Australian Kelpie	0.9952	0.9934	0.994	0.9916	dog qi = 0.95–0.99	dog qi = 0.96–0.99	dog qi = 0.93–0.98	dog qi = 0.92–0.97
AUK016	Australian Kelpie	0.997	0.9954	0.995	0.9926	dog qi = 0.96–0.99	dog qi = 0.97–0.99	dog qi = 0.95–0.99	dog qi = 0.93–0.97
AUK039	Australian Kelpie	0.998	0.997	0.997	0.996	dog qi = 0.99–1.00	dog qi = 0.99–1.00	dog qi = 0.99–1.00	dog qi = 0.98–0.99
AUK105	Australian Kelpie	0.9976	0.997	0.996	0.995	dog qi = 0.98–1.00	dog qi = 0.98–1.00	dog qi = 0.96–0.99	dog qi = 0.96–0.99
AUK133	Australian Kelpie	0.9912	0.9874	0.9876	0.9832	dog qi = 0.90–0.97	dog qi = 0.92–0.97	dog qi = 0.82–0.93	dog qi = 0.85–0.94
AUT029	Australian Terrier	0.9952	0.9972	0.9924	0.9926	dog qi = 0.95–0.99	dog qi = 0.96–0.98	dog qi = 0.92–0.98	dog qi = 0.93–0.98
AUT073	Australian Terrier	0.9482	0.9956	0.9256	0.9282	dog qi = 0.51–0.54, no qi ≥ 0.5 to any category	dog qi = 0.58–0.60, no qi ≥ 0.5 to any category	BC2d qi = 0.58–0.59, no qi ≥ 0.5 to any category	no qi ≥ 0.5 to any category
AUT148	Australian Terrier	0.998	0.998	0.997	0.9966	dog qi = 0.99–1.00	dog qi = 0.99–1.00	dog qi = 0.99–1.00	dog qi = 0.98–1.00
AUT342	Australian Terrier	0.9906	0.999	0.9874	0.9836	dog qi = 0.88–0.96	dog qi = 0.89–0.95	dog qi = 0.86–0.95	dog qi = 0.84–0.93
AUT428	Australian Terrier	0.9952	0.9934	0.9926	0.9916	dog qi = 0.94–0.99	dog qi = 0.95–0.98	dog qi = 0.92–0.98	dog qi = 0.91–0.97
BAR009	Barbet	0.995	0.998	0.9934	0.9908	dog qi = 0.94–0.98	dog qi = 0.94–0.98	dog qi = 0.93–0.98	dog qi = 0.91–0.97
BAR030	Barbet	0.998	0.997	0.997	0.997	dog qi = 0.99–1.00	dog qi = 0.99–1.00	dog qi = 0.99–1.00	dog qi = 0.99–1.00
BAR047	Barbet	0.997	0.997	0.9954	0.9946	dog qi = 0.98–1.00	dog qi = 0.98–1.00	dog qi = 0.96–0.99	dog qi = 0.96–0.99
BAR069	Barbet	0.997	0.997	0.9948	0.9936	dog qi = 0.97–0.99	dog qi = 0.98–1.00	dog qi = 0.96–0.99	dog qi = 0.95–0.98
BAR092	Barbet	0.9816	0.996	0.9712	0.9638	dog qi = 0.68–0.82	dog qi = 0.74–0.83	dog qi = 0.57–0.73	dog qi = 0.53–0.67
BGL028	Beagle	0.997	0.9962	0.9944	0.9944	dog qi = 0.98–1.00	dog qi = 0.98–1.00	dog qi = 0.95–0.99	dog qi = 0.96–0.99
BGL120	Beagle	0.998	0.997	0.997	0.997	dog qi = 0.99–1.00	dog qi = 0.99–1.00	dog qi = 0.99–1.00	dog qi = 0.99–1.00
BGL150	Beagle	0.995	0.9954	0.9924	0.9904	dog qi = 0.94–0.99	dog qi = 0.95–0.98	dog qi = 0.92–0.98	dog qi = 0.91–0.97
BGL020	Beagle	0.9934	0.995	0.989	0.9888	dog qi = 0.92–0.98	dog qi = 0.94–0.98	dog qi = 0.86–0.95	dog qi = 0.89–0.96
BGL023	Beagle	0.9988	0.998	0.998	0.997	dog qi = 1.00	dog qi = 1.00	dog qi = 0.99–1.00	dog qi = 0.99–1.00
BPG593	Belgian Shepherd Dog	0.999	0.8828	0.9984	0.998	dog qi = 1.00	dog qi = 1.00	dog qi = 1.00	dog qi = 1.00
BPM005	Belgian Shepherd Dog	0.996	0.7484	0.9944	0.9916	dog qi = 0.95–0.99	dog qi = 0.96–0.99	dog qi = 0.95–0.99	dog qi = 0.93–0.97
BPM257	Belgian Shepherd Dog	0.9922	0.8228	0.9894	0.9872	dog qi = 0.91–0.98	dog qi = 0.92–0.97	dog qi = 0.89–0.97	dog qi = 0.89–0.96
BPM318	Belgian Shepherd Dog	0.998	0.9758	0.9974	0.997	dog qi = 0.99–1.00	dog qi = 0.99–1.00	dog qi = 0.99–1.00	dog qi = 0.99–1.00
BPT267	Belgian Shepherd Dog	0.998	0.9934	0.997	0.996	dog qi = 0.99–1.00	dog qi = 0.99–1.00	dog qi = 0.99–1.00	dog qi = 0.98–1.00
BIF465	Bichon Frise	0.997	0.9944	0.9954	0.9936	dog qi = 0.98–1.00	dog qi = 0.98–1.00	dog qi = 0.97–0.99	dog qi = 0.96–0.99
BIF346	Bichon Frise	0.9912	0.9834	0.9894	0.9822	dog qi = 0.88–0.96	dog qi = 0.89–0.95	dog qi = 0.88–0.96	dog qi = 0.80–0.91
BIF493	Bichon Frise	0.999	0.997	0.998	0.9974	dog qi = 1.00	dog qi = 1.00	dog qi = 0.99–1.00	dog qi = 0.99–1.00
BIF534	Bichon Frise	0.996	0.9974	0.9944	0.9902	dog qi = 0.95–0.99	dog qi = 0.95–0.98	dog qi = 0.94–0.98	dog qi = 0.88–0.95
BIF548	Bichon Frise	0.9962	0.999	0.9934	0.9936	dog qi = 0.97–0.99	dog qi = 0.98–0.99	dog qi = 0.94–0.99	dog qi = 0.95–0.98
BC027	Border Collie	0.9952	0.9984	0.9934	0.9914	dog qi = 0.96–0.99	dog qi = 0.96–0.99	dog qi = 0.95–0.99	dog qi = 0.93–0.98
BC1094	Border Collie	0.998	0.999	0.9964	0.997	dog qi = 0.99–1.00	dog qi = 0.99–1.00	dog qi = 0.98–1.00	dog qi = 0.98–1.00
BC1320	Border Collie	0.998	0.996	0.997	0.9966	dog qi = 0.99–1.00	dog qi = 0.99–1.00	dog qi = 0.98–1.00	dog qi = 0.98–1.00
BC689	Border Collie	0.997	0.9972	0.9944	0.995	dog qi = 0.98–1.00	dog qi = 0.98–1.00	dog qi = 0.95–0.99	dog qi = 0.97–0.99
BC989	Border Collie	0.9962	0.998	0.9942	0.993	dog qi = 0.97–0.99	dog qi = 0.98–0.99	dog qi = 0.94–0.99	dog qi = 0.94–0.98
BOR027	Border Terrier	0.9952	0.973	0.9934	0.9896	dog qi = 0.95–0.99	dog qi = 0.96–0.99	dog qi = 0.93–0.98	dog qi = 0.91–0.97
BOR204	Border Terrier	0.996	0.9542	0.9944	0.9906	dog qi = 0.96–0.99	dog qi = 0.97–0.99	dog qi = 0.95–0.99	dog qi = 0.93–0.98
BOR223	Border Terrier	0.999	0.9854	0.998	0.997	dog qi = 1.00	dog qi = 1.00	dog qi = 1.00	dog qi = 0.99–1.00
BOR148	Border Terrier	0.998	0.9856	0.9974	0.9964	dog qi = 0.99–1.00	dog qi = 0.99–1.00	dog qi = 0.99–1.00	dog qi = 0.98–1.00
BOR249	Border Terrier	0.9912	0.995	0.9868	0.9788	dog qi = 0.91–0.98	dog qi = 0.93–0.98	dog qi = 0.89–0.97	dog qi = 0.85–0.95
B034	Boxer	0.994	0.9944	0.9874	0.9846	dog qi = 0.95–0.99	dog qi = 0.97–0.99	dog qi = 0.89–0.97	dog qi = 0.89–0.96
B060	Boxer	0.932	0.9934	0.927	0.8908	dog qi = 0.54–0.57, no qi ≥ 0.5 to any category	dog qi = 0.57, no qi ≥ 0.5 to any category	dog qi = 0.51–0.53, no qi ≥ 0.5 to any category	dog qi = 0.53, BC2d qi = 0.61–0.64, no qi ≥ 0.5 to any category
B095	Boxer	0.981	0.9984	0.9694	0.9514	dog qi = 0.82–0.95	dog qi = 0.86–0.95	dog qi = 0.74–0.92	dog qi = 0.61–0.81, no qi ≥ 0.5 to any category
B123	Boxer	0.9436	0.998	0.9268	0.9024	dog qi = 0.55–0.77	dog qi = 0.64–0.79	dog qi = 0.64–0.67, no qi ≥ 0.5 to any category	no qi ≥ 0.5 to any category
B149	Boxer	0.9654	0.997	0.9588	0.9308	dog qi = 0.69–0.86	dog qi = 0.73–0.85	dog qi = 0.63–0.82	dog qi = 0.61–0.62, no qi ≥ 0.5 to any category
KBT006	Bull Terrier	0.998	0.997	0.997	0.9964	dog qi = 0.99–1.00	dog qi = 0.99–1.00	dog qi = 0.99–1.00	dog qi = 0.99–1.00
KBT021	Bull Terrier	0.998	0.998	0.9974	0.997	dog qi = 0.99–1.00	dog qi = 1.00	dog qi = 0.99–1.00	dog qi = 0.99–1.00
BUL180	Bull Terrier	0.9982	0.9922	0.998	0.997	dog qi = 1.00	dog qi = 1.00	dog qi = 0.99–1.00	dog qi = 0.99–1.00
BUL075	Bull Terrier	0.997	0.9692	0.9952	0.994	dog qi = 0.98–1.00	dog qi = 0.98–1.00	dog qi = 0.97–0.99	dog qi = 0.97–0.99
BUL078	Bull Terrier	0.9982	0.898	0.998	0.9972	dog qi = 1.00	dog qi = 1.00	dog qi = 0.99–1.00	dog qi = 0.99–1.00
EBD012	Bulldog	0.998	0.996	0.997	0.996	dog qi = 0.99–1.00	dog qi = 0.99–1.00	dog qi = 0.98–1.00	dog qi = 0.98–1.00
EBD013	Bulldog	0.998	0.997	0.9968	0.9956	dog qi = 0.99–1.00	dog qi = 0.99–1.00	dog qi = 0.98–1.00	dog qi = 0.98–0.99
EBD033	Bulldog	0.9978	0.9974	0.9964	0.995	dog qi = 0.98–1.00	dog qi = 0.99–1.00	dog qi = 0.98–1.00	dog qi = 0.97–0.99
EBD073	Bulldog	0.997	0.9914	0.995	0.9946	dog qi = 0.98–1.00	dog qi = 0.99–1.00	dog qi = 0.97–0.99	dog qi = 0.97–0.99
EBD140	Bulldog	0.998	0.9944	0.997	0.9964	dog qi = 0.99–1.00	dog qi = 0.99–1.00	dog qi = 0.98–1.00	dog qi = 0.98–1.00
CT015	Cairn Terrier	0.998	0.9294	0.9968	0.996	dog qi = 0.99–1.00	dog qi = 0.99–1.00	dog qi = 0.98–1.00	dog qi = 0.98–0.99
CT019	Cairn Terrier	0.999	0.9244	0.998	0.998	dog qi = 1.00	dog qi = 1.00	dog qi = 1.00	dog qi = 1.00
CT076	Cairn Terrier	0.997	0.9544	0.9952	0.994	dog qi = 0.98–1.00	dog qi = 0.99–1.00	dog qi = 0.96–0.99	dog qi = 0.96–0.99
CT077	Cairn Terrier	0.998	0.7372	0.9954	0.9946	dog qi = 0.99–1.00	dog qi = 0.99–1.00	dog qi = 0.98–1.00	dog qi = 0.98–1.00
CT094	Cairn Terrier	0.9962	0.8172	0.9934	0.9926	dog qi = 0.97–0.99	dog qi = 0.98–0.99	dog qi = 0.94–0.99	dog qi = 0.94–0.98
CSV001	Czechoslovakian Wolfdog	0.6512	0.998	0.6372	0.6464	F2 qi = 1.00	F2 qi = 1.00	F2 qi = 1.00	F2 qi = 1.00
CSV006	Czechoslovakian Wolfdog	0.7356	0.998	0.7278	0.7298	BC2d qi = 0.61–0.87	BC2d qi = 0.68–0.90	BC2d qi = 0.58–0.88	BC1d qi = 0.50, BC2d qi = 0.50–0.77
CSV025	Czechoslovakian Wolfdog	0.7424	0.9874	0.7336	0.7326	BC2d qi = 0.71–0.91	BC2d qi = 0.77–0.93	BC2d qi = 0.66–0.91	BC1d qi = 0.50, BC2d qi = 0.52–0.77
CSV027	Czechoslovakian Wolfdog	0.7032	0.9924	0.6924	0.7006	BC2d qi = 0.66–0.67, no qi ≥ 0.5 to any category	BC2d qi = 0.59–0.81	F2 qi = 0.65–0.69	F2 qi = 0.54–0.56, no qi ≥ 0.5 to any category
CSV046	Czechoslovakian Wolfdog	0.672	0.922	0.6592	0.6652	F2 qi = 0.98	F2 qi = 0.95–0.96	F2 qi = 1.00	F2 qi = 0.99–1.00
KKM165	Dachshund	0.9986	0.9096	0.998	0.997	dog qi = 0.99–1.00	dog qi = 1.00	dog qi = 0.99–1.00	dog qi = 0.99–1.00
KKM194	Dachshund	0.998	0.9728	0.9966	0.9956	dog qi = 0.99–1.00	dog qi = 0.99–1.00	dog qi = 0.98–1.00	dog qi = 0.97–0.99
KKM195	Dachshund	0.996	0.9976	0.995	0.991	dog qi = 0.96–0.99	dog qi = 0.97–0.99	dog qi = 0.96–0.99	dog qi = 0.92–0.97
KKM200	Dachshund	0.9882	0.9984	0.9832	0.9738	dog qi = 0.80–0.91	dog qi = 0.83–0.91	dog qi = 0.76–0.90	dog qi = 0.65–0.79
KKM202	Dachshund	0.998	0.9658	0.997	0.9956	dog qi = 0.99–1.00	dog qi = 0.99–1.00	dog qi = 0.98–1.00	dog qi = 0.97–0.99
DAL003	Dalmatian	0.9878	0.9964	0.9708	0.97	dog qi = 0.88–0.97	dog qi = 0.93–0.98	dog qi = 0.74–0.92	dog qi = 0.77–0.91
DAL046	Dalmatian	0.996	0.9092	0.9924	0.9906	dog qi = 0.95–0.99	dog qi = 0.97–0.99	dog qi = 0.92–0.98	dog qi = 0.90–0.96
DAL077	Dalmatian	0.996	0.9512	0.9924	0.9906	dog qi = 0.96–0.99	dog qi = 0.97–0.99	dog qi = 0.93–0.98	dog qi = 0.91–0.97
DAL084	Dalmatian	0.995	0.998	0.9898	0.9856	dog qi = 0.96–0.99	dog qi = 0.97–0.99	dog qi = 0.92–0.98	dog qi = 0.91–0.97
DAL139	Dalmatian	0.999	0.998	0.998	0.9976	dog qi = 1.00	dog qi = 1.00	dog qi = 1.00	dog qi = 0.99–1.00
SIL025	East Siberian Laika	0.9768	0.997	0.9702	0.9552	dog qi = 0.64–0.78	dog qi = 0.67–0.77	dog qi = 0.58–0.75	dog qi = 0.60–0.61, no qi ≥ 0.5 to any category
SIL032	East Siberian Laika	0.9082	0.994	0.9082	0.882	BC2d qi = 0.52–0.68	BC2d qi = 0.54–0.69	BC2d qi = 0.63, no qi ≥ 0.5 to any category	BC2d qi = 0.58–0.77
SIL052	East Siberian Laika	0.8906	0.9894	0.8898	0.8694	BC2d qi = 0.75–0.88	BC2d qi = 0.77–0.89	BC2d qi = 0.72–0.86	BC2d qi = 0.76–0.90
SIL062	East Siberian Laika	0.7472	0.9706	0.7458	0.735	BC1d qi = 0.70–0.71, BC2d qi = 0.69–0.70	BC1d qi = 0.67, BC2d qi = 0.74	BC1d qi = 0.66–0.67, BC2d qi = 0.78	BC1d qi = 0.53–0.87, BC2d qi = 0.51
SIL065	East Siberian Laika	0.8232	0.9666	0.8224	0.8124	BC2d qi = 0.92–0.98	BC2d qi = 0.93–0.98	BC2d qi = 0.89–0.97	BC2d qi = 0.90–0.97
SLK444	Finnish Lapphund	0.9692	0.9582	0.961	0.9558	dog qi = 0.55–0.71	dog qi = 0.58–0.69	dog qi = 0.53–0.67, no qi ≥ 0.5 to any category	dog qi = 0.62–0.63, no qi ≥ 0.5 to any category
SLK449	Finnish Lapphund	0.998	0.998	0.997	0.9968	dog qi = 0.99–1.00	dog qi = 1.00	dog qi = 0.99–1.00	dog qi = 0.99–1.00
SLK483	Finnish Lapphund	0.997	0.996	0.9962	0.9938	dog qi = 0.98–1.00	dog qi = 0.98–1.00	dog qi = 0.98–1.00	dog qi = 0.96–0.99
SLK758	Finnish Lapphund	0.996	0.994	0.9926	0.9926	dog qi = 0.95–0.99	dog qi = 0.96–0.99	dog qi = 0.92–0.98	dog qi = 0.93–0.98
SLK155	Finnish Lapphund	0.9946	0.9926	0.9906	0.9894	dog qi = 0.93–0.98	dog qi = 0.94–0.98	dog qi = 0.88–0.96	dog qi = 0.88–0.95
SPK507	Finnish Spitz	0.9714	0.9602	0.9664	0.9514	dog qi = 0.69–0.85	dog qi = 0.71–0.83	dog qi = 0.66–0.84	dog qi = 0.58–0.75
SPK159	Finnish Spitz	0.9882	0.9844	0.9802	0.9788	dog qi = 0.88–0.97	dog qi = 0.91–0.97	dog qi = 0.82–0.94	dog qi = 0.82–0.93
SPK173	Finnish Spitz	0.9894	0.9874	0.9804	0.9808	dog qi = 0.89–0.97	dog qi = 0.92–0.97	dog qi = 0.81–0.93	dog qi = 0.84–0.94
SPK228	Finnish Spitz	0.9586	0.9472	0.9528	0.9414	dog qi = 0.64–0.82	dog qi = 0.67–0.81	dog qi = 0.60–0.80	dog qi = 0.57–0.75
SPK428	Finnish Spitz	0.9822	0.9772	0.9732	0.969	dog qi = 0.80–0.93	dog qi = 0.84–0.93	dog qi = 0.73–0.87	dog qi = 0.72–0.86
SKN059	Flat Coated Retriever	0.999	0.9984	0.9984	0.998	dog qi = 1.00	dog qi = 1.00	dog qi = 1.00	dog qi = 0.99–1.00
SKN172	Flat Coated Retriever	0.999	0.9984	0.998	0.998	dog qi = 1.00	dog qi = 1.00	dog qi = 1.00	dog qi = 1.00
SKN265	Flat Coated Retriever	0.998	0.998	0.998	0.9966	dog qi = 0.99–1.00	dog qi = 0.99–1.00	dog qi = 0.99–1.00	dog qi = 0.99–1.00
SKN345	Flat Coated Retriever	0.999	0.9984	0.998	0.998	dog qi = 1.00	dog qi = 1.00	dog qi = 1.00	dog qi = 1.00
SKN372	Flat Coated Retriever	0.999	0.998	0.9986	0.9976	dog qi = 1.00	dog qi = 1.00	dog qi = 1.00	dog qi = 0.99–1.00
KT079	Foxterrier	0.9972	0.997	0.997	0.9942	dog qi = 0.98–1.00	dog qi = 0.99–1.00	dog qi = 0.98–1.00	dog qi = 0.97–0.99
KT098	Foxterrier	0.998	0.9956	0.9966	0.9956	dog qi = 0.99–1.00	dog qi = 0.99–1.00	dog qi = 0.98–1.00	dog qi = 0.98–0.99
KT101	Foxterrier	0.998	0.9884	0.997	0.996	dog qi = 0.99–1.00	dog qi = 0.99–1.00	dog qi = 0.99–1.00	dog qi = 0.98–1.00
KT127	Foxterrier	0.994	0.9864	0.9914	0.9886	dog qi = 0.95–0.99	dog qi = 0.96–1.00	dog qi = 0.93–0.98	dog qi = 0.91–0.97
KT132	Foxterrier	0.996	0.9894	0.9934	0.9926	dog qi = 0.97–0.99	dog qi = 0.98–1.00	dog qi = 0.95–0.99	dog qi = 0.96–0.99
RBD050	French Bulldog	0.9982	0.992	0.9974	0.997	dog qi = 0.99–1.00	dog qi = 1.00	dog qi = 0.99–1.00	dog qi = 0.99–1.00
RBD060	French Bulldog	0.9872	0.998	0.9858	0.9698	dog qi = 0.83–0.93	dog qi = 0.85–0.93	dog qi = 0.93–0.98	dog qi = 0.70–0.84
RBD095	French Bulldog	0.998	0.998	0.9964	0.995	dog qi = 0.99–1.00	dog qi = 0.99–1.00	dog qi = 0.98–1.00	dog qi = 0.97–1.00
RBD128	French Bulldog	0.9982	0.997	0.9974	0.997	dog qi = 0.99–1.00	dog qi = 0.99–1.00	dog qi = 0.99–1.00	dog qi = 0.99–1.00
RBD136	French Bulldog	0.9938	0.9962	0.9892	0.9852	dog qi = 0.93–0.98	dog qi = 0.95–0.98	dog qi = 0.88–0.96	dog qi = 0.85–0.94
SMT007	German Hunting Terrier	0.9962	0.995	0.9944	0.994	dog qi = 0.97–1.00	dog qi = 0.98–0.99	dog qi = 0.96–0.99	dog qi = 0.96–0.99
SMT048	German Hunting Terrier	0.998	0.997	0.996	0.996	dog qi = 0.99–1.00	dog qi = 0.99–1.00	dog qi = 0.97–1.00	dog qi = 0.98–0.99
SMT068	German Hunting Terrier	0.998	0.997	0.997	0.995	dog qi = 0.99–1.00	dog qi = 0.99–1.00	dog qi = 0.98–1.00	dog qi = 0.97–0.99
SMT069	German Hunting Terrier	0.997	0.995	0.9956	0.9926	dog qi = 0.97–0.99	dog qi = 0.97–0.99	dog qi = 0.97–0.99	dog qi = 0.94–0.98
SMT072	German Hunting Terrier	0.998	0.9964	0.997	0.995	dog qi = 0.99–1.00	dog qi = 0.99–1.00	dog qi = 0.99–1.00	dog qi = 0.97–0.99
SP099	German Shepherd Dog	0.998	0.998	0.9974	0.997	dog qi = 0.99–1.00	dog qi = 1.00	dog qi = 0.99–1.00	dog qi = 0.99–1.00
SP1106	German Shepherd Dog	0.9982	0.998	0.997	0.997	dog qi = 0.99–1.00	dog qi = 1.00	dog qi = 0.99–1.00	dog qi = 0.99–1.00
SP1535	German Shepherd Dog	0.9912	0.988	0.9874	0.9822	dog qi = 0.91–0.97	dog qi = 0.92–0.97	dog qi = 0.87–0.96	dog qi = 0.84–0.93
SP1872	German Shepherd Dog	0.9982	0.998	0.998	0.9966	dog qi = 1.00	dog qi = 1.00	dog qi = 0.99–1.00	dog qi = 0.99–1.00
SP2177	German Shepherd Dog	0.999	0.999	0.999	0.9986	dog qi = 1.00	dog qi = 1.00	dog qi = 1.00	dog qi = 1.00
TD219	Great Dane	0.9816	0.997	0.9712	0.9628	dog qi = 0.81–0.93	dog qi = 0.84–0.92	dog qi = 0.73–0.89	dog qi = 0.67–0.82
TD441	Great Dane	0.9952	0.998	0.9932	0.9896	dog qi = 0.95–0.99	dog qi = 0.96–0.99	dog qi = 0.93–0.98	dog qi = 0.90–0.96
TD653	Great Dane	0.9792	0.998	0.9704	0.9618	dog qi = 0.73–0.86	dog qi = 0.77–0.86	dog qi = 0.67–0.83	dog qi = 0.60–0.74
TD073	Great Dane	0.9632	0.998	0.952	0.9388	dog qi = 0.57–0.73	dog qi = 0.63–0.74	dog qi = 0.50–0.66	dog qi = 0.59, no qi ≥ 0.5 to any category
TD354	Great Dane	0.9902	0.8748	0.9864	0.9806	dog qi = 0.87–0.95	dog qi = 0.89–0.95	dog qi = 0.84–0.95	dog qi = 0.80–0.91
GRI005	griffon	0.999	0.999	0.999	0.999	dog qi = 1.00	dog qi = 1.00	dog qi = 1.00	dog qi = 1.00
GRI007	griffon	0.999	0.999	0.999	0.9986	dog qi = 1.00	dog qi = 1.00	dog qi = 1.00	dog qi = 1.00
GRI015	griffon	0.999	0.9984	0.998	0.998	dog qi = 1.00	dog qi = 1.00	dog qi = 1.00	dog qi = 1.00
GRI030	griffon	0.9982	0.998	0.998	0.997	dog qi = 0.99–1.00	dog qi = 1.00	dog qi = 0.99–1.00	dog qi = 0.99–1.00
GRI077	griffon	0.998	0.997	0.997	0.9956	dog qi = 0.99–1.00	dog qi = 0.99–1.00	dog qi = 0.98–1.00	dog qi = 0.98–0.99
ISP097	Irish Setter	0.999	0.999	0.999	0.9986	dog qi = 1.00	dog qi = 1.00	dog qi = 1.00	dog qi = 1.00
ISP085	Irish Setter	0.999	0.999	0.999	0.9986	dog qi = 1.00	dog qi = 1.00	dog qi = 1.00	dog qi = 1.00
ISP030	Irish Setter	0.9948	0.993	0.9888	0.9906	dog qi = 0.95–0.99	dog qi = 0.97–0.99	dog qi = 0.90–0.98	dog qi = 0.93–0.98
ISP022	Irish Setter	0.9962	0.995	0.994	0.9936	dog qi = 0.98–1.00	dog qi = 0.98–1.00	dog qi = 0.96–0.99	dog qi = 0.97–0.99
ISP092	Irish Setter	0.999	0.999	0.999	0.998	dog qi = 1.00	dog qi = 1.00	dog qi = 1.00	dog qi = 1.00
VT046	Irish Soft Coated Wheaten Terrier	0.9962	0.9954	0.9944	0.9926	dog qi = 0.98–1.00	dog qi = 0.99–1.00	dog qi = 0.97–0.99	dog qi = 0.96–0.99
VT107	Irish Soft Coated Wheaten Terrier	0.998	0.997	0.997	0.9956	dog qi = 0.99–1.00	dog qi = 0.99–1.00	dog qi = 0.99–1.00	dog qi = 0.98–0.99
VT112	Irish Soft Coated Wheaten Terrier	0.999	0.998	0.998	0.997	dog qi = 1.00	dog qi = 1.00	dog qi = 0.99–1.00	dog qi = 0.99–1.00
VT125	Irish Soft Coated Wheaten Terrier	0.9962	0.9954	0.9934	0.9926	dog qi = 0.96–0.99	dog qi = 0.97–0.99	dog qi = 0.93–0.98	dog qi = 0.93–0.98
VT131	Irish Soft Coated Wheaten Terrier	0.999	0.998	0.998	0.9976	dog qi = 1.00	dog qi = 1.00	dog qi = 1.00	dog qi = 0.99–1.00
IT037	Italian Greyhound	0.9204	0.9102	0.92	0.8984	dog qi = 0.52–0.55, no qi ≥ 0.5 to any category	no qi ≥ 0.5 to any category	dog qi = 0.59–0.62, no qi ≥ 0.5 to any category	BC2d qi = 0.51–0.53, no qi ≥ 0.5 to any category
IT081	Italian Greyhound	0.9686	0.959	0.957	0.9408	dog qi = 0.65–0.84	dog qi = 0.70–0.84	dog qi = 0.57–0.80	dog qi = 0.66–0.67, no qi ≥ 0.5 to any category
IT099	Italian Greyhound	0.9196	0.91	0.9144	0.903	BC2d qi = 0.51, no qi ≥ 0.5 to any category	BC2d qi = 0.53, no qi ≥ 0.5 to any category	no qi ≥ 0.5 to any category	BC2d qi = 0.52, no qi ≥ 0.5 to any category
IT139	Italian Greyhound	0.9902	0.9844	0.986	0.9732	dog qi = 0.89–0.97	dog qi = 0.90–0.97	dog qi = 0.88–0.97	dog qi = 0.77–0.91
IT143	Italian Greyhound	0.972	0.9658	0.9566	0.9498	dog qi = 0.77–0.93	dog qi = 0.82–0.93	dog qi = 0.69–0.90	dog qi = 0.67–0.86
KKK209	Karelian Beardog	0.9812	0.973	0.978	0.9604	dog qi = 0.74–0.87	dog qi = 0.76–0.85	dog qi = 0.73–0.87	dog qi = 0.58–0.73
KKK242	Karelian Beardog	0.9084	0.8998	0.9026	0.8818	BC2d qi = 0.58–0.73	BC2d qi = 0.59–0.74	BC2d qi = 0.52–0.68, no qi ≥ 0.5 to any category	BC2d qi = 0.62–0.79
KKK057	Karelian Beardog	0.8898	0.8772	0.8988	0.876	BC2d qi = 0.72–0.86	BC2d qi = 0.75–0.88	BC2d qi = 0.62–0.78	BC2d qi = 0.68–0.84
KKK181	Karelian Beardog	0.9732	0.9632	0.966	0.953	dog qi = 0.67–0.84	dog qi = 0.69–0.81	dog qi = 0.65–0.85	dog qi = 0.55–0.74
KKK216	Karelian Beardog	0.9704	0.953	0.9754	0.9484	dog qi = 0.59–0.74	dog qi = 0.58–0.68	dog qi = 0.67–0.83	dog qi = 0.62–0.63, no qi ≥ 0.5 to any category
LB123	Labrador Retriever	0.9804	0.9758	0.961	0.9704	dog qi = 0.78–0.93	dog qi = 0.84–0.93	dog qi = 0.62–0.83	dog qi = 0.76–0.91
LB186	Labrador Retriever	0.998	0.997	0.997	0.9956	dog qi = 0.99–1.00	dog qi = 0.99–1.00	dog qi = 0.99–1.00	dog qi = 0.98–0.99
LB220	Labrador Retriever	0.995	0.9934	0.9922	0.9906	dog qi = 0.95–0.99	dog qi = 0.96–0.99	dog qi = 0.92–0.98	dog qi = 0.93–0.98
LB276	Labrador Retriever	0.997	0.9964	0.9954	0.995	dog qi = 0.98–1.00	dog qi = 0.99–1.00	dog qi = 0.97–0.99	dog qi = 0.97–0.99
LB641	Labrador Retriever	0.999	0.999	0.9986	0.998	dog qi = 1.00	dog qi = 1.00	dog qi = 1.00	dog qi = 1.00
LAG016	Lagotto Romagnolo	0.9972	0.9964	0.9958	0.9956	dog qi = 0.98–1.00	dog qi = 0.99–1.00	dog qi = 0.97–0.99	dog qi = 0.98–0.99
LAG099	Lagotto Romagnolo	0.998	0.998	0.997	0.9966	dog qi = 0.99–1.00	dog qi = 0.99–1.00	dog qi = 0.79–0.93	dog qi = 0.99–1.00
LAG1181	Lagotto Romagnolo	0.998	0.9974	0.997	0.9966	dog qi = 0.99–1.00	dog qi = 0.99–1.00	dog qi = 0.99–1.00	dog qi = 0.98–1.00
LAG234	Lagotto Romagnolo	0.995	0.9934	0.9904	0.9896	dog qi = 0.96–0.99	dog qi = 0.97–0.99	dog qi = 0.92–0.98	dog qi = 0.92–0.97
LAG704	Lagotto Romagnolo	0.998	0.997	0.9964	0.9956	dog qi = 0.99–1.00	dog qi = 0.99–1.00	dog qi = 0.98–1.00	dog qi = 0.97–0.99
NFK023	Newfoundland	0.999	0.998	0.998	0.9976	dog qi = 1.00	dog qi = 1.00	dog qi = 0.99–1.00	dog qi = 0.99–1.00
NFK040	Newfoundland	0.998	0.9974	0.9974	0.996	dog qi = 0.99–1.00	dog qi = 0.99–1.00	dog qi = 0.99–1.00	dog qi = 0.98–0.99
NFK069	Newfoundland	0.997	0.9954	0.9948	0.9938	dog qi = 0.97–0.99	dog qi = 0.98–0.99	dog qi = 0.96–0.99	dog qi = 0.96–0.99
NFK079	Newfoundland	0.9982	0.998	0.9974	0.997	dog qi = 1.00	dog qi = 1.00	dog qi = 0.99–1.00	dog qi = 0.99–1.00
NFK101	Newfoundland	0.998	0.997	0.9964	0.9956	dog qi = 0.99–1.00	dog qi = 0.99–1.00	dog qi = 0.98–1.00	dog qi = 0.98–0.99
HNH055	Norwegian Elkhound Grey	0.999	0.998	0.998	0.998	dog qi = 1.00	dog qi = 1.00	dog qi = 1.00	dog qi = 1.00
HNH066	Norwegian Elkhound Grey	0.9982	0.998	0.998	0.9966	dog qi = 0.99–1.00	dog qi = 1.00	dog qi = 0.99–1.00	dog qi = 0.99–1.00
HNH155	Norwegian Elkhound Grey	0.998	0.997	0.997	0.996	dog qi = 0.99–1.00	dog qi = 0.99–1.00	dog qi = 0.99–1.00	dog qi = 0.98–0.99
HNH346	Norwegian Elkhound Grey	0.999	0.998	0.998	0.997	dog qi = 1.00	dog qi = 1.00	dog qi = 0.99–1.00	dog qi = 0.99–1.00
HNH633	Norwegian Elkhound Grey	0.997	0.996	0.9956	0.9936	dog qi = 0.98–1.00	dog qi = 0.98–1.00	dog qi = 0.97–0.99	dog qi = 0.96–0.99
PAP001	Papillon	0.999	0.999	0.998	0.998	dog qi = 1.00	dog qi = 1.00	dog qi = 1.00	dog qi = 1.00
PAP003	Papillon	0.998	0.998	0.997	0.9966	dog qi = 0.99–1.00	dog qi = 1.00	dog qi = 0.99–1.00	dog qi = 0.99–1.00
PAP005	Papillon	0.999	0.9982	0.998	0.9976	dog qi = 1.00	dog qi = 1.00	dog qi = 1.00	dog qi = 0.99–1.00
PAP006	Papillon	0.995	0.9932	0.9904	0.9904	dog qi = 0.93–0.98	dog qi = 0.95–0.98	dog qi = 0.88–0.96	dog qi = 0.90–0.96
PAP007	Papillon	0.997	0.9954	0.9954	0.9916	dog qi = 0.98–1.00	dog qi = 0.98–1.00	dog qi = 0.97–1.00	dog qi = 0.95–0.98
PHA016	Phalène	0.999	0.9984	0.998	0.998	dog qi = 1.00	dog qi = 1.00	dog qi = 0.99–1.00	dog qi = 0.99–1.00
PHA024	Phalène	0.998	0.997	0.9964	0.996	dog qi = 0.99–1.00	dog qi = 0.99–1.00	dog qi = 0.98–1.00	dog qi = 0.98–0.99
PHA031	Phalène	0.999	0.999	0.998	0.998	dog qi = 1.00	dog qi = 1.00	dog qi = 1.00	dog qi = 0.99–1.00
PHA033	Phalène	0.999	0.999	0.998	0.998	dog qi = 1.00	dog qi = 1.00	dog qi = 1.00	dog qi = 1.00
PHA061	Phalène	0.998	0.9974	0.9964	0.9966	dog qi = 0.99–1.00	dog qi = 0.99–1.00	dog qi = 0.98–1.00	dog qi = 0.98–1.00
MOP081	Pug	0.998	0.997	0.997	0.9956	dog qi = 0.99–1.00	dog qi = 0.99–1.00	dog qi = 0.99–1.00	dog qi = 0.98–1.00
MOP143	Pug	0.9982	0.998	0.998	0.9966	dog qi = 0.99–1.00	dog qi = 0.99–1.00	dog qi = 0.99–1.00	dog qi = 0.99–1.00
MOP213	Pug	0.998	0.9974	0.998	0.9964	dog qi = 0.99–1.00	dog qi = 0.99–1.00	dog qi = 0.99–1.00	dog qi = 0.99–1.00
MOP247	Pug	0.993	0.9894	0.9922	0.9862	dog qi = 0.93–0.98	dog qi = 0.94–0.98	dog qi = 0.93–0.98	dog qi = 0.89–0.96
MOP380	Pug	0.9972	0.997	0.996	0.9956	dog qi = 0.99–1.00	dog qi = 0.99–1.00	dog qi = 0.98–1.00	dog qi = 0.98–0.99
PYP004	Pyrenean Sheepdog	0.9872	0.9834	0.9798	0.9706	dog qi = 0.86–0.95	dog qi = 0.89–0.96	dog qi = 0.79–0.93	dog qi = 0.73–0.87
PYP068	Pyrenean Sheepdog	0.9664	0.956	0.961	0.9386	dog qi = 0.54–0.57, no qi ≥ 0.5 to any category	dog qi = 0.53–0.56, no qi ≥ 0.5 to any category	dog qi = 0.56–0.58, no qi ≥ 0.5 to any category	dog qi = 0.53–0.55, no qi ≥ 0.5 to any category
PYP074	Pyrenean Sheepdog	0.9842	0.9796	0.9766	0.9688	dog qi = 0.77–0.90	dog qi = 0.82–0.90	dog qi = 0.69–0.85	dog qi = 0.64–0.79
PYP143	Pyrenean Sheepdog	0.995	0.9934	0.9914	0.9882	dog qi = 0.92–0.98	dog qi = 0.94–0.98	dog qi = 0.88–0.96	dog qi = 0.83–0.92
PYP114	Pyrenean Sheepdog	0.9976	0.9964	0.997	0.9948	dog qi = 0.98–1.00	dog qi = 0.99–1.00	dog qi = 0.98–1.00	dog qi = 0.96–0.99
RW055	Rottweiler	0.998	0.998	0.9976	0.9966	dog qi = 0.99–1.00	dog qi = 1.00	dog qi = 0.99–1.00	dog qi = 0.99–1.00
RW067	Rottweiler	0.998	0.997	0.9964	0.9956	dog qi = 0.99–1.00	dog qi = 0.99–1.00	dog qi = 0.98–1.00	dog qi = 0.98–0.99
RW141	Rottweiler	0.9842	0.9744	0.9828	0.9668	dog qi = 0.87–0.96	dog qi = 0.87–0.95	dog qi = 0.87–0.97	dog qi = 0.76–0.90
RW226	Rottweiler	0.998	0.9978	0.998	0.997	dog qi = 0.99–1.00	dog qi = 0.99–1.00	dog qi = 0.99–1.00	dog qi = 0.99–1.00
RW356	Rottweiler	0.997	0.996	0.9954	0.9936	dog qi = 0.99–1.00	dog qi = 0.99–1.00	dog qi = 0.98–1.00	dog qi = 0.97–0.99
VUL008	Russo-European Laika	0.8672	0.8584	0.8752	0.8674	BC2d qi = 0.89–0.96	BC2d qi = 0.97–0.99	BC2d qi = 0.86–0.95	BC2d qi = 0.82–0.93
VUL009	Russo-European Laika	0.9724	0.965	0.9642	0.9454	dog qi = 0.61–0.75	dog qi = 0.65–0.75	dog qi = 0.56–0.72	dog qi = 0.56, no qi ≥ 0.5 to any category
VUL011	Russo-European Laika	0.8002	0.7964	0.8066	0.7876	BC2d qi = 0.95–0.99	BC2d qi = 0.96–0.99	BC2d qi = 0.93–0.98	BC2d qi = 0.92–0.97
VUL012	Russo-European Laika	0.8022	0.7994	0.8064	0.79	BC2d qi = 0.93–0.98	BC2d qi = 0.94–0.98	BC2d qi = 0.92–0.98	BC2d qi = 0.85–0.95
VUL017	Russo-European Laika	0.9064	0.9016	0.8944	0.881	BC2d qi = 0.55–0.70	BC2d qi = 0.53–0.67	BC2d qi = 0.55–0.72	BC2d qi = 0.60–0.79
SWH058	Saarloos Wolfdog	0.713	0.9894	0.7054	0.7004	BC2d qi = 0.75–0.87	BC2d qi = 0.86–0.94	BC2d qi = 0.60–0.62, no qi ≥ 0.5 to any category	F2 qi = 0.65–0.84
SWH062	Saarloos Wolfdog	0.7016	0.9976	0.6934	0.6948	BC1d qi = 0.67–0.68, BC2d qi = 0.58–0.59	BC1d qi = 0.61, BC2d qi = 0.71	BC1d qi = 0.58–0.59, no qi ≥ 0.5 to any category	F2 qi = 0.59, BC1d qi = 0.61, no qi ≥ 0.5 to any category
SWH067	Saarloos Wolfdog	0.7682	0.9974	0.7644	0.762	BC2d qi = 0.93–0.98	BC2d qi = 0.95–0.99	BC2d qi = 0.91–0.98	BC2d qi = 0.87–0.95
SWH089	Saarloos Wolfdog	0.6422	0.9934	0.628	0.6314	F2 qi = 0.99	F2 qi = 0.97–0.99	F2 qi = 1.00	F2 qi = 1.00
SWH124	Saarloos Wolfdog	0.7012	0.994	0.6874	0.6936	BC2d qi = 0.60–0.61, no qi ≥ 0.5 to any category	BC2d qi = 0.68–0.84	F2 qi = 0.86–0.87	F2 qi = 0.74–0.87
SA187	Saluki	0.9126	0.908	0.89	0.8962	BC2d qi = 0.64–0.78	BC2d qi = 0.60–0.74	BC2d qi = 0.71–0.85	BC2d qi = 0.59–0.76
SA247	Saluki	0.9162	0.9112	0.8976	0.8922	BC2d qi = 0.66–0.79	BC2d qi = 0.63–0.76	BC2d qi = 0.70–0.84	BC2d qi = 0.65–0.81
SA368	Saluki	0.8942	0.8888	0.8786	0.8928	BC2d qi = 0.63–0.78	BC2d qi = 0.62–0.77	BC2d qi = 0.67–0.83	BC2d qi = 0.51–0.68
SA632	Saluki	0.8426	0.8378	0.8458	0.8344	BC2d qi = 0.91–0.98	BC2d qi = 0.93–0.98	BC2d qi = 0.89–0.97	BC2d qi = 0.87–0.96
SA793	Saluki	0.9062	0.9038	0.8846	0.8938	BC2d qi = 0.60–0.77	BC2d qi = 0.55–0.74	BC2d qi = 0.68–0.86	BC2d qi = 0.53–0.73
SAM191	Samoyed	0.8412	0.8396	0.8416	0.8292	BC2d qi = 0.86–0.96	BC2d qi = 0.87–0.96	BC2d qi = 0.83–0.95	BC2d qi = 0.84–0.95
SAM207	Samoyed	0.8632	0.8634	0.8512	0.8616	BC2d qi = 0.74–0.90	BC2d qi = 0.74–0.89	BC2d qi = 0.76–0.93	BC2d qi = 0.65–0.85
SAM241	Samoyed	0.813	0.811	0.8144	0.8002	BC2d qi = 0.92–0.99	BC2d qi = 0.93–0.99	BC2d qi = 0.90–0.98	BC2d qi = 0.91–0.97
SAM317	Samoyed	0.9108	0.9116	0.8774	0.9056	BC2d qi = 0.55–0.57, no qi ≥ 0.5 to any category	no qi ≥ 0.5 to any category	BC2d qi = 0.60–0.79	BC2d qi = 0.51–0.54, no qi ≥ 0.5 to any category
SAM427	Samoyed	0.8032	0.804	0.7998	0.7932	BC2d qi = 0.94–0.99	BC2d qi = 0.95–0.99	BC2d qi = 0.94–0.99	BC2d qi = 0.87–0.96
SCH244	Schipperke	0.998	0.998	0.997	0.997	dog qi = 0.99–1.00	dog qi = 1.00	dog qi = 0.99–1.00	dog qi = 0.99–1.00
SCH133	Schipperke	0.999	0.998	0.998	0.9978	dog qi = 1.00	dog qi = 1.00	dog qi = 1.00	dog qi = 1.00
SCH457	Schipperke	0.999	0.999	0.999	0.999	dog qi = 1.00	dog qi = 1.00	dog qi = 1.00	dog qi = 1.00
SCH141	Schipperke	0.998	0.998	0.9974	0.9966	dog qi = 0.99–1.00	dog qi = 0.99–1.00	dog qi = 0.99–1.00	dog qi = 0.98–1.00
SCH146	Schipperke	0.999	0.9986	0.998	0.998	dog qi = 1.00	dog qi = 1.00	dog qi = 1.00	dog qi = 1.00
SHE291	Shetland Sheepdog	0.9944	0.9932	0.9892	0.9882	dog qi = 0.95–0.99	dog qi = 0.97–1.00	dog qi = 0.90–0.97	dog qi = 0.90–0.97
SHE318	Shetland Sheepdog	0.999	0.999	0.999	0.998	dog qi = 1.00	dog qi = 1.00	dog qi = 1.00	dog qi = 1.00
SHE526	Shetland Sheepdog	0.998	0.9972	0.9964	0.9956	dog qi = 0.99–1.00	dog qi = 0.99–1.00	dog qi = 0.98–1.00	dog qi = 0.98–0.99
SHE544	Shetland Sheepdog	0.9962	0.995	0.9944	0.9926	dog qi = 0.98–1.00	dog qi = 0.98–1.00	dog qi = 0.96–0.99	dog qi = 0.95–0.99
SHE572	Shetland Sheepdog	0.9982	0.998	0.998	0.9968	dog qi = 0.99–1.00	dog qi = 1.00	dog qi = 0.99–1.00	dog qi = 0.99–1.00
SH049	Siberian Husky	0.6464	0.646	0.6512	0.6344	F2 qi = 0.94–0.98	F2 qi = 0.94–0.98	F2 qi = 0.95–0.98	F2 qi = 0.99–1.00
SH092	Siberian Husky	0.63	0.6334	0.6244	0.6166	F2 qi = 1.00	F2 qi = 1.00	F2 qi = 1.00	F2 qi = 1.00
SH260	Siberian Husky	0.7282	0.7274	0.7324	0.7104	BC2d qi = 0.85–0.95	BC2d qi = 0.96	BC2d qi = 0.90–0.97	BC2d qi = 0.62, no qi ≥ 0.5 to any category
SH271	Siberian Husky	0.6656	0.6654	0.6684	0.6506	F2 qi = 0.95–0.97	F2 qi = 0.93–0.97	F2 qi = 0.96–0.98	F2 qi = 0.99–1.00
SH337	Siberian Husky	0.655	0.6582	0.6508	0.6426	F2 qi = 0.97–0.99	F2 qi = 0.96–0.98	F2 qi = 0.99–1.00	F2 qi = 1.00
SBT438	Staffordshire Bull Terrieri	0.999	0.9984	0.998	0.998	dog qi = 1.00	dog qi = 1.00	dog qi = 1.00	dog qi = 1.00
SBT468	Staffordshire Bull Terrieri	0.999	0.998	0.998	0.998	dog qi = 1.00	dog qi = 1.00	dog qi = 1.00	dog qi = 1.00
SBT038	Staffordshire Bull Terrieri	0.999	0.998	0.998	0.997	dog qi = 1.00	dog qi = 1.00	dog qi = 1.00	dog qi = 0.99–1.00
SBT119	Staffordshire Bull Terrieri	0.998	0.998	0.9974	0.9966	dog qi = 0.99–1.00	dog qi = 1.00	dog qi = 0.99–1.00	dog qi = 0.99–1.00
SBT191	Staffordshire Bull Terrieri	0.999	0.998	0.998	0.9976	dog qi = 1.00	dog qi = 1.00	dog qi = 0.99–1.00	dog qi = 0.99–1.00
JPK057	Swedish Elkhound	0.995	0.9934	0.9914	0.9892	dog qi = 0.95–0.99	dog qi = 0.96–0.99	dog qi = 0.92–0.98	dog qi = 0.90–0.96
JPK059	Swedish Elkhound	0.9962	0.995	0.994	0.9926	dog qi = 0.97–0.99	dog qi = 0.95–0.97	dog qi = 0.94–0.99	dog qi = 0.94–0.98
JPK078	Swedish Elkhound	0.9902	0.9884	0.9796	0.9772	dog qi = 0.89–0.97	dog qi = 0.92–0.98	dog qi = 0.79–0.92	dog qi = 0.77–0.89
JPK121	Swedish Elkhound	0.998	0.9974	0.997	0.996	dog qi = 0.99–1.00	dog qi = 0.99–1.00	dog qi = 0.98–1.00	dog qi = 0.97–0.99
JPK297	Swedish Elkhound	0.9942	0.9924	0.9914	0.9862	dog qi = 0.93–0.98	dog qi = 0.94–0.98	dog qi = 0.89–0.97	dog qi = 0.84–0.93
LJP013	Swedish Vallhund	0.9636	0.9528	0.9502	0.9446	dog qi = 0.59–0.71	dog qi = 0.61–0.71	dog qi = 0.58–0.60, no qi ≥ 0.5 to any category	dog qi = 0.62, no qi ≥ 0.5 to any category
LJP090	Swedish Vallhund	0.994	0.991	0.9924	0.9896	dog qi = 0.95–0.99	dog qi = 0.95–0.99	dog qi = 0.94–0.99	dog qi = 0.92–0.97
LJP102	Swedish Vallhund	0.994	0.9914	0.99	0.9884	dog qi = 0.94–0.99	dog qi = 0.95–0.99	dog qi = 0.90–0.98	dog qi = 0.90–0.96
LJP121	Swedish Vallhund	0.9674	0.9572	0.9548	0.9474	dog qi = 0.74–0.90	dog qi = 0.78–0.90	dog qi = 0.66–0.85	dog qi = 0.61–0.79
LJP165	Swedish Vallhund	0.9862	0.9786	0.9836	0.9686	dog qi = 0.83–0.94	dog qi = 0.85–0.93	dog qi = 0.82–0.93	dog qi = 0.71–0.85
VRH001	Swedish White Elkhound	0.998	0.998	0.9974	0.9966	dog qi = 0.99–1.00	dog qi = 0.99–1.00	dog qi = 0.99–1.00	dog qi = 0.99–1.00
VRH006	Swedish White Elkhound	0.998	0.997	0.997	0.996	dog qi = 0.99–1.00	dog qi = 0.99–1.00	dog qi = 0.99–1.00	dog qi = 0.98–1.00
VRH010	Swedish White Elkhound	0.997	0.9954	0.9954	0.9938	dog qi = 0.97–1.00	dog qi = 0.98–0.99	dog qi = 0.97–0.99	dog qi = 0.96–0.99
VRH013	Swedish White Elkhound	0.999	0.998	0.998	0.9976	dog qi = 1.00	dog qi = 1.00	dog qi = 0.99–1.00	dog qi = 0.99–1.00
VLT171	West Highland White Terrier	0.998	0.997	0.9954	0.9958	dog qi = 0.99–1.00	dog qi = 0.99–1.00	dog qi = 0.97–1.00	dog qi = 0.98–1.00
VLT432	West Highland White Terrier	0.999	0.998	0.998	0.9976	dog qi = 1.00	dog qi = 1.00	dog qi = 0.99–1.00	dog qi = 0.99–1.00
VLT487	West Highland White Terrier	0.999	0.998	0.9974	0.997	dog qi = 1.00	dog qi = 1.00	dog qi = 0.99–1.00	dog qi = 0.99–1.00
VLT520	West Highland White Terrier	0.995	0.9932	0.9912	0.9892	dog qi = 0.95–0.99	dog qi = 0.96–0.99	dog qi = 0.92–0.98	dog qi = 0.91–0.97
VLT530	West Highland White Terrier	0.9942	0.9916	0.9914	0.9886	dog qi = 0.95–0.99	dog qi = 0.96–0.99	dog qi = 0.94–0.99	dog qi = 0.92–0.97
LSL001	West Siberian Laika	0.8974	0.8924	0.8784	0.8876	BC2d qi = 0.58–0.74	BC2d qi = 0.57–0.72	BC2d qi = 0.62–0.80	BC2d qi = 0.52–0.69, no qi ≥ 0.5 to any category
LSL004	West Siberian Laika	0.9176	0.9092	0.909	0.8976	BC2d qi = 0.72–0.85	BC2d qi = 0.72–0.84	BC2d qi = 0.71–0.85	BC2d qi = 0.70–0.85
LSL009	West Siberian Laika	0.8532	0.852	0.8464	0.8408	BC2d qi = 0.89–0.97	BC2d qi = 0.90–0.97	BC2d qi = 0.88–0.96	BC2d qi = 0.86–0.95
LSL011	West Siberian Laika	0.8062	0.8054	0.8064	0.7962	BC2d qi = 0.93–0.99	BC2d qi = 0.94–0.99	BC2d qi = 0.91–0.98	BC2d qi = 0.91–0.97
LSL012	West Siberian Laika	0.899	0.8944	0.8874	0.877	BC2d qi = 0.79–0.90	BC2d qi = 0.79–0.89	BC2d qi = 0.78–0.90	BC2d qi = 0.78–0.90
WH022	Whippet	0.9972	0.996	0.9964	0.9936	dog qi = 0.98–1.00	dog qi = 0.99–1.00	dog qi = 0.98–1.00	dog qi = 0.96–0.99
WH462	Whippet	0.998	0.998	0.998	0.997	dog qi = 0.99–1.00	dog qi = 0.99–1.00	dog qi = 0.99–1.00	dog qi = 0.99–1.00
WH670	Whippet	0.999	0.998	0.998	0.9976	dog qi = 1.00	dog qi = 0.99–1.00	dog qi = 1.00	dog qi = 0.99–1.00
WH750	Whippet	0.997	0.996	0.996	0.9936	dog qi = 0.98–1.00	dog qi = 0.99–1.00	dog qi = 0.98–1.00	dog qi = 0.96–0.99
WH765	Whippet	0.997	0.996	0.996	0.9926	dog qi = 0.98–1.00	dog qi = 0.99–1.00	dog qi = 0.98–1.00	dog qi = 0.96–0.99
