# Supplementary material for: Reliable wolf-dog hybrid detection in Europe using a reduced SNP panel developed for non-invasively collected samples
Source: BMC Genomics. 2021 Jun 25;22:473. doi: 10.1186/s12864-021-07761-5 (PMC8235813; doi:10.1186/s12864-021-07761-5)
Supplement: Supplementary file 6 — Additional file 6: Table S6. Description of suspected hybrid samples and discussion of the corresponding results. Microsatellite results, used for comparison, are unpublished. [file 12864_2021_7761_MOESM6_ESM.xlsx]

## Sheet: Sheet1
Sample	Background information	Results with the 93 SNP panel
CL370	Canid with uncommon phenotype for wolf. Shot in Perho (Finland) in 1994-1995. Identified as F1 by previous microsatellite analysis by NEWHYBRIDS using 17 markers.	Individual was categorized as F1 hybrid by NEWHYBRIDS. Also, STRUCTURE analysis supported the individual to be F1 (qw = 0.52).
CL134	A male canid with uncommon phenotype for wolf. Seemed to be paired with a female wolf. Shot in Juva (Finland) in 2005. In the previous microsatellite analysis CL134 was assigned as F2, but with low probability (qi=0.5), by NEWHYBRIDS using 17 markers.	Individual was categorized as F1 hybrid by NEWHYBRIDS. Also, STRUCTURE analysis supported the individual to be F1 (qw = 0.55).
CL309, pups CL308 & CL307	A German Shepherd looking male (CL309) paired with a female wolf that had lost its original mate in Kuusamo (Finland). The pair had two offspring (CL307 and CL308) in the spring of 2010. Male and pups were eliminated by the Finnish authorities in 2010 to prevent further introgression. In the previous microsatellite analysis CL309 was assigned as F2 by NEWHYBRIDS using 17 markers.	CL309 was categorized as F2 by NEWHYBRIDS (qi=1.00 with all four prior combinations tested). STRUCTURE analysis (qw = 0.63) is consistent with it. The pups (CL307 and CL308) were categorized to different hybrid classes (BC1w and BC2w) even it is known both are from the same litter. Pups are most likely from a hybrid class that was not included in the analysis (F2 x wolf) so BC1w and BC2w are the …
CL419	The individual was slain by virtue of a derogation in 2016 in Pyhäjoki (Finland). In the previous microsatellite analysis CL419 was categorized as suspected hybrid. It had low assignment to wolves (qw < 0.85) by STRUCTURE (K=2) using 17 markers.	The individual was categorized as BC2w by NEWHYBRIDS and had STRUCTURE assignment probability to wolves (0.89) that seems to be typical for BC2w hybrids based on simulated individuals.
CL420	The individual was hit by car and died in 2015 in Tohmajärvi (Finland). It had low assignment to wolves (qw < 0.85) by STRUCTURE (K=2) using 17 markers.	The individual was categorized as BC2w or BC3w by NEWHYBRIDS depending on priors used. It had STRUCTURE assignment probability to wolves (0.92) that was more typical for BC3w hybrids than BC2w hybrids based on simulated individuals.
Pups GW01xf, GW02xm & GW03xm	A female wolf that was born in the first German pack paired with a German shepherd dog in Sachsen (Germany) in 2003. Nine hybrid pups were identified by fotos and field observations. Three pups were sampled and two of them were caught and kept in enclosure. The fate of the other seven pups remained unknown. Pups were identified as F1 in the previous microsatellite analysis STRUCTURE (K=2) using 1…	The pups were categorized as F1 hybrids by NEWHYBRIDS as expected based on background information about the samples. Also, STRUCTURE analysis (qw = 0.54–0.56) and previous microsatellite results supported individuals to be F1 hybrids.
RO022m	A male canid that was sampled in autumn 2014 in Vrancea county (Romania). It had less than 0.85 posterior probability to be assigned as wolf in previous microsatellite analysis using 13 markers and analyzed with STRUCTURE (K=2).	The individual was categorized as BC2w by NEWHYBRIDS and had STRUCTURE assignment probability to wolves (0.85) that is typical for BC2w hybrids based on simulated individuals.
GW05xf	Fotos taken at the German-Czech border close to Rumburk in autumn 2016, indicated an F1-hybridization event with three pups. Two hybrids, including GW05xf, did not survive the following weeks. Microsatellite analysis using 13 markers confirmed the hybridization status and provided evidence that a female wolf originating from the wolf core area in Eastern Germany mated with a male domestic dog.	The individual was categorized as F1 hybrid by NEWHYBRIDS analysis as expected based on the microsatellite results. Also, STRUCTURE analysis (qw = 0.52) supported individuals to be F1 hybrids.
