# Supplementary material for: Reliable wolf-dog hybrid detection in Europe using a reduced SNP panel developed for non-invasively collected samples
Source: BMC Genomics. 2021 Jun 25;22:473. doi: 10.1186/s12864-021-07761-5 (PMC8235813; doi:10.1186/s12864-021-07761-5)
Supplement: Supplementary file 7 — Additional file 7: Table S7. NEWHYBRIDS and STRUCTURE results for Finnish museum samples categorized in different time periods as in Jansson et al. [54]. [file 12864_2021_7761_MOESM7_ESM.xlsx]

## Sheet: Sheet1
		NEWHYBRIDS		STRUCTURE
ORIGIN	SAMPLE CODE	ASSIGNED CATEGORY	qi	WOLF qw
Finland	ow104	wolf	1	0.98
Before 1920	ow40	wolf	1	1
	ow74	wolf	1	1
	ow65	wolf	1	1
	ow78	wolf	1	0.98
	ow91	wolf	1	1
	ow81	wolf	1	1
Finland	ow95	wolf	1	1
1920-1959	ow36	wolf	1	1
	ow101	wolf	1	1
	ow99	wolf	1	1
Finland	ow22	wolf	1	1
1960-1979	ow26	wolf	1	1
	ow37	wolf	1	1
	ow38	wolf	1	1
	ex4	wolf	1	1
	ex7	wolf	1	1
	ow10	wolf	1	1
	ow34	wolf	1	1
	ow14	wolf	1	1
	ow1	wolf	1	1
	ow13	wolf	1	1
Finland	ow7	wolf	1	1
1980-1993	ow61	wolf	1	1
	ow30	wolf	1	1
	ow50	wolf	1	1
	ow55	wolf	1	0.98
	ow52	wolf	1	1
	ow53	wolf	1	0.98
	ow62	wolf	1	1
NEWHYBRIDS was run with four different prior combinations. The range of the resulting values are indicated. STRUCTURE qi values correspond to allocations with K = 2 to the domestic (dog) and wild (wolf) clusters.
