# Supplementary material for: Reliable wolf-dog hybrid detection in Europe using a reduced SNP panel developed for non-invasively collected samples
Source: BMC Genomics. 2021 Jun 25;22:473. doi: 10.1186/s12864-021-07761-5 (PMC8235813; doi:10.1186/s12864-021-07761-5)
Supplement: Supplementary file 8 — Additional file 8: Table S8. NEWHYBRIDS and STRUCTURE results for wolves living in two animal parks in Germany. [file 12864_2021_7761_MOESM8_ESM.xlsx]

## Sheet: Sheet1
		NEWHYBRIDS		STRUCTURE
ORIGIN	SAMPLE CODE	ASSIGNED CATEGORY	qi	WOLF qw
Wolves from zoo	TP1	wolf	1	0.97
	TP2	wolf	1	0.99
	TP3	wolf	0.98–1.00	0.97
	TP4	wolf	1	0.99
NEWHYBRIDS was run with four different prior combinations. The range of the resulting values are marked. STRUCTURE qi values correspond to allocations with K = 2 to the domestic (dog) and wild (wolf) clusters
