# Supplementary material for: Reliable wolf-dog hybrid detection in Europe using a reduced SNP panel developed for non-invasively collected samples
Source: BMC Genomics. 2021 Jun 25;22:473. doi: 10.1186/s12864-021-07761-5 (PMC8235813; doi:10.1186/s12864-021-07761-5)
Supplement: Supplementary file 9 — Additional file 9: Table S9. NEWHYBRIDS and STRUCTURE results for other canid species that successfully amplified with the SNP panel. [file 12864_2021_7761_MOESM9_ESM.xlsx]

## Sheet: Sheet1
		NEWHYBRIDS		STRUCTURE
ORIGIN	SAMPLE CODE	ASSIGNED CATEGORY	qi	WOLF qw
golden jackals	Leo007	wolf	0.99–1.00	0.95
	W150872	wolf	0.99–1.00	0.96
	X150238	wolf	1	0.98
foxes	K160631	wolf	1	0.96
	K160636	wolf	1	0.96
	W161285	wolf	1	0.96
NEWHYBRIDS was run with four different prior combinations. The range of the resulting values are marked. STRUCTURE qi values correspond to allocations with K = 2 to the domestic (dog) and wild (wolf) clusters.
