# Supplementary material for: Reliable wolf-dog hybrid detection in Europe using a reduced SNP panel developed for non-invasively collected samples
Source: BMC Genomics. 2021 Jun 25;22:473. doi: 10.1186/s12864-021-07761-5 (PMC8235813; doi:10.1186/s12864-021-07761-5)
Supplement: Supplementary file 11 — Additional file 11: Table S11. Assignment accuracy for the selected 93 SNPs to categorize simulated individuals between dog and Iberian wolves for 8 different hybrid classes to the correct category (> 0.5) or assign it to any hybrid category (sum of assignments to hybrid categories > 0.7) by the software NEWHYBRIDS. Analysis was run with the four possible prior combinations. Range of results from different runs is indicated. [file 12864_2021_7761_MOESM11_ESM.xlsx]

## Sheet: Sheet1
HYBRID CATEGORY	n	ASSIGNMENT TO RIGHT CATEGORY (qi>0.5; %)	ASSIGNED AS HYBRID (qi>0.7; %)
F1	100	100	100
F2	100	100	100
BC1w	100	94	100
BC2w	100	94	100
BC3w	100	94	95-96
BC1d	100	94	100
BC2d	100	94	59-60
BC3d	100	94	12
