# Supplementary material for: Reliable wolf-dog hybrid detection in Europe using a reduced SNP panel developed for non-invasively collected samples
Source: BMC Genomics. 2021 Jun 25;22:473. doi: 10.1186/s12864-021-07761-5 (PMC8235813; doi:10.1186/s12864-021-07761-5)
Supplement: Supplementary file 12 — Additional file 12: Table S12. Description of SNPs and primer sequences used in this study. Allele frequencies for the 93 SNPs are also reported. The first tab contains 96 SNPs that were included in the final SNP panel. Three SNPs that were removed before the analysis are indicated. The remaining SNPs that were tested but not included in the final panel and their corresponding primer sequences are in the second tab. [file 12864_2021_7761_MOESM12_ESM.xlsx]

## Sheet: Final panel
SNP name	Chr	Position (CanFam2)	Position (CanFam3)	Allele 1	FreqWOLF_all	FreqWOLF_EastEurope	FreqWOLF_IT	FreqWOLF_IB	FreqDOG	FreqJACKAL††	FreqFOX††	Allele 2	FreqWOLF_all	FreqWOLF_EastEurope	FreqWOLF_IT	FreqWOLF_IB	FreqDOG	FreqJACKAL††	FreqFOX††	ASP1_SEQ (forward allele1)	ASP2_SEQ (forward allele2)	LSP_SEQ (reverse)	STA_SEQ (forward STA step)
BICF2P878735	2	59404052	56535052	A	0	0	0	0	0.7348	0	0	G	1	1	1	1	0.2652	1	1	GACTACAGAAATCCGCTCTCCAT	ACTACAGAAATCCGCTCTCCAC	TCGCCTGTTACAGCTTTCCCA	TGGGCACTTCCAGGACA
BICF2P779255	11	73097995	70068128	T	0	0	0	0	0.7376	0.3333	NA	A	1	1	1	1	0.2624	0.6667	NA	TTGCATATGAGCATGCTACATTTTGA	TTGCATATGAGCATGCTACATTTTGT	CCCCCTCTCATGTGGTTCAGA	GCATTCATAGAAGCCCTGATTCTG
G750f39S170	12	40806042	37802395	T	0	0	0	0	0.7395	0	0	C	1	1	1	1	0.2605	1	1	CCTTCAGGATAATTGAGTCAAGAAATTGAT	CCTTCAGGATAATTGAGTCAAGAAATTGAC	ACTAATTCTCACCAATATCAAACTTATTCAGAGACC	AGCTTTCTGCTTGTCTGTTTTACA
BICF2S23033793	37	21935224	18935566	A	0	0	0	0	0.7414	0	0	G	1	1	1	1	0.2586	1	1	GAATCTGTTGTTTGTTTCACATGGGA	ATCTGTTGTTTGTTTCACATGGGG	TGCTCATAGAGCAAAGGTTAAAGGAAGT	CCTATTCCCCAAAATGATCAAACCA
BICF2P1122577	28	32059012	29058281	C	0	0	0	0	0.7462	0	0	T	1	1	1	1	0.2538	1	1	ATGTTAACTGATTCCATTTATTACCATGTCAG	GATGTTAACTGATTCCATTTATTACCATGTCAA	TCTGAAGTTAGCAGAAATAACAAAGTTTTAAATAAAAGAA	AAATTGTGGAGCTTTTTAAATTGAATAGATGT
BICF2G630115554	16	38079477	35124987	T	0	0	0	0	0.7471	0	0	C	1	1	1	1	0.2529	1	1	TTTCCAGTCATTTTTACAGAGGGTTAGA	TCCAGTCATTTTTACAGAGGGTTAGG	TCAGGAAAATTTCAATGGAATAAGTTCTTTGTGATT	CATTTCCCTCATGTACATCTTTTGTC
BICF2S236916	19	17950393	14945857	T	0	0	0	0	0.7567	0	0	C	1	1	1	1	0.2433	1	1	CTAGAACCTTCCCTCAGAATTTCCTTTA	GAACCTTCCCTCAGAATTTCCTTTG	GCAATAGGGTAAATAAATTACACCTAATTACAGAAACTC	CCGGGTTGCCCTACAATTATATT
BICF2P1334121	2	32937207	30093818	A	0	0	0	0	0.7708	0	0	G	1	1	1	1	0.2292	1	1	GCCTATCACATCCCACTATCCTTT	GCCTATCACATCCCACTATCCTTC	GCAAGCCAGAAGGGCAAAACA	TGTTGCCATCCTCTTTTCTCTTG
BICF2P521676	2	35346623	32502802	A	0	0	0	0	0.7917	1	0	G	1	1	1	1	0.2083	0	1	CGGTGATCGGACAATTGGTGT	GGTGATCGGACAATTGGTGC	ATTTGCCCGCACTCCTGC	GCTTTCCTCTAACTCCAAGGAAAT
BICF2S23758182	28	35642983	32641862	A	0	0	0	0	0.7992	0	0	G	1	1	1	1	0.2008	1	1	GCCCCTCCCACAACCAT	GCCCCTCCCACAACCAC	AGCGCTCTGATGGCACCT	CTCTTTGTTCCCAAGCCCC
BICF2G630320565	22	19859504	16913009	T	0	0	0	0	0.90152	0	0	C	1	1	1	1	0.09848	1	1	TTCTCCGGAGCATCCAGAAAA	TTCTCCGGAGCATCCAGAAAG	CCTGGGGGTTCATAGCACAGT	CCCAACAAATTTGAAGGCTGAATTA
BICF2P451419	4	77656050	74458441	A	0.001779	0.002688	0	0	0.744	0	0	G	0.998221	0.997312	1	1	0.256	1	1	GGTGCCTATGTTTCCTTTCATTTACATTAAT	GGTGCCTATGTTTCCTTTCATTTACATTAAC	TTTAGTTAGAATGTTATGTAAAATTGAATTGTTGAGAAAA	ACCATTGGCTGTAAAAGTCTTAGG
BICF2G630565160	7	65942668	62908663	A	0.001779	0	0.007143	0	0.7652	0	0	G	0.998221	1	0.992857	1	0.2348	1	1	AGAAAGAAACAAAGACAAAGTTCTATTCTTCA	AGAAAGAAACAAAGACAAAGTTCTATTCTTCG	AGGAGCTTGATGCTCGTGTGT	CAAAGGCACAGAACTAGTACTTCA
BICF2G630843397	16	12115699	9152093	T	0.001779	0	0.007143	0	0.7841	0	0	G	0.998221	1	0.992857	1	0.2159	1	1	CGGACCTTGACCTTGACAGT	CGGACCTTGACCTTGACAGG	GGTCTCCTTCCCTGGAGCA	TGAGGTGAACAGAAGACCGT
BICF2S22912279	15	40739453	37729189	G	0.001792	0	0.007143	0	0.8049	0	0	A	0.998208	1	0.992857	1	0.1951	1	1	AATTGCAAAGGGCAGGAACAC	CAATTGCAAAGGGCAGGAACAT	AGCCTCCAATTACAGATAACCTTGCT	ATCAAGCTGAGAGATGAAATGCAA
BICF2S24115352	3	8332047	5448906	T	0.001866	0.00289	0	0	0.75	0	0	C	0.998134	0.99711	1	1	0.25	1	1	TTCCCAACAAATCCTCCAGTTCT	TCCCAACAAATCCTCCAGTTCC	GCAGGCAGTGTCATGTTGGA	TCCAGGGTTTTTTGTTTTTCCCA
BICF2G630245112	33	5402330	2432073	A	0.003559	0.005376	0	0	0.7557	0	0	C	0.996441	0.994624	1	1	0.2443	1	1	TCTAGGAAGAGGAAAATGATTCCTAATTTGT	CTAGGAAGAGGAAAATGATTCCTAATTTGG	ACCAATCAGTGCTGGGGACA	ACCTAACCAATCCATCTTTCTAGGA
TIGRP2P327375_rs9002871	25	27243309	24260343	A	0.003559	0	0	0.04	0.7739	0	0	T	0.996441	1	1	0.96	0.2261	1	1	TGGAAGCATTTTCCCTCTAATCCT	TGGAAGCATTTTCCCTCTAATCCA	GTGTAAGGTTGCTTATTTTCAAATCGAGTTATCT	TGTCAGTACCTAGTAAAAGACCAACA
BICF2P995528	29	27403451	24402846	T	0.003559	0	0.01429	0	0.7805	0	0	G	0.996441	1	0.98571	1	0.2195	1	1	CACATGTATGAGTTCACTTGATTATGTTGAA	CACATGTATGAGTTCACTTGATTATGTTGAC	CATTATGAATTTTGTACATCCAATGGAGACTGT	AAGCACGTATTTGGAATATGATCACA
BICF2G630317215	22	12411515	9464710	C	0.003559	0.002688	0.007143	0	0.8011	0	NA	T	0.996441	0.997312	0.992857	1	0.1989	1	NA	TCTTAATGTGAATGTTTAAAACCAGTCCAG	TCTTAATGTGAATGTTTAAAACCAGTCCAA	CTTCCATTGATCTGGAGATGGGC	GGTGCACAAAGTATTTCCATTAACC
TIGRP2P216521_rs8707766	16	44638172	41676727	G	0.003571	0.005376	0	0	0.7385	0	0	C	0.996429	0.994624	1	1	0.2615	1	1	CCTCTCTAGGCTTCTGTGTACG	CCTCTCTAGGCTTCTGTGTACC	AACAGTGATATGTTCTATAATACTACAGTTACATATATTT	CATGTGACTATGGCAAGATCAGC
BICF2G630412395	30	4512220	1523168	C	0.003571	0	0.01429	0	0.7538	0	0	T	0.996429	1	0.98571	1	0.2462	1	1	GCTTCTTAGAGTAAATGTCCAGGAGAAG	GCTTCTTAGAGTAAATGTCCAGGAGAAA	CCTTTGGGGAAAGCAGCTGAA	GTGGTTTTGCTAGTTTACTTTTGCT
BICF2G630247224	33	10366434	7350479	T	0.003571	0.005405	0	0	0.8125	0	NA	A	0.996429	0.994595	1	1	0.1875	1	NA	GGTTTAGGTGGTCGCTGAATTTCTA	GTTTAGGTGGTCGCTGAATTTCTT	GAGAAATCAAATAAACAGTAAATTCCAACTCAGAAGT	CCAGAGTGAGCAGGAGAACA
TIGRP2P39029_rs8914036	3	22932700	20048563	C	0.00361	0.005435	0	0	0.7395	0	0	A	0.99639	0.994565	1	1	0.2605	1	1	AGCATATTTTGCATAATAGATTGATCAATACACC	AGCATATTTTGCATAATAGATTGATCAATACACA	CCTGAATTTAGGGGCAGTTGCA	GGGCTTTGGGAATTAAGAAATTACCT
TIGRP2P278990_rs8738286	21	4722506	1725900	C	0.005338	0	0.007143	0.04	0.7595	0	0	T	0.994662	1	0.992857	0.96	0.2405	1	1	GCTGTCTGTGGGCTTCTCG	GCTGTCTGTGGGCTTCTCA	GAGAGCCCCACCATCCCA	TTCTTCTCTGTTAGGTTTGACTTGC
BICF2P1056166	20	16275436	13273535	A	0.005357	0	0.02143	0	0.7197	0	0	C	0.994643	1	0.97857	1	0.2803	1	1	TTTGTGCTACCACTATTGAGCTCTAATA	TGTGCTACCACTATTGAGCTCTAATC	CAAAATACCAAGCAATGAATAATTTTCCATTCAATTCT	GAACATCCTTTTACCACTAGGCTT
BICF2P285168	33	11941510	8926215	T	0.005357	0.008108	0	0	0.7254	0.8333	0	C	0.994643	0.991892	1	1	0.2746	0.1667	1	GCTACATGAGATGAAAGCAAGGTT	GCTACATGAGATGAAAGCAAGGTC	GCCAAGAGAAGGATAGAGAGTCCC	GCTGTGCCAAGTTCATATGTGTTT
BICF2P407965	28	14493972	11496843	G	0.005415	0.008242	0	0	0.6742	0	0	A	0.994585	0.991758	1	1	0.3258	1	1	CCTCTCTGAAATGCCTAGCACTC	CCTCTCTGAAATGCCTAGCACTT	CGGGATGCCTGTTTGTCTCCT	GGCTGCACTCCACAGGA
BICF2S23219794	8	45785493	42749955	C	0.007117	0.01075	0	0	0.8016	0	0	A	0.992883	0.98925	1	1	0.1984	1	1	GATCTGCTCCACTGCCTTTTC	TGATCTGCTCCACTGCCTTTTA	TGGATGAGGCCACAAATGGGT	CCTATGAGAGCTCATTCCAAGTG
BICF2P306813	20	61128041	57982848	A	0.007194	0.002732	0.02143	0	0.7443	0	0	G	0.992806	0.997268	0.97857	1	0.2557	1	1	AGCTAGAAGCACATTTCCCGTTTA	GCTAGAAGCACATTTCCCGTTTG	CGGAGGCCGCAGCAGA	GCGGCTCTTAATGAAGACGGA
TIGRP2P116574_rs8920568	8	7732816	4727630	A	0.007194	0.01093	0	0	0.7973	0	0	G	0.992806	0.98907	1	1	0.2027	1	1	CTGTGACTCACTGATCTGGACAAT	TGTGACTCACTGATCTGGACAAC	AAGCTGCCAAATTCAGCAGCA	GCTCTAGAGCCAACAGCG
BICF2P660709	23	46052279	43000880	A	0.007937	0.01087	0	0	0.827	0	0	T	0.992063	0.98913	1	1	0.173	1	1	CATTGATATTGACCTATGTTAAATATCTTTGCCT	CATTGATATTGACCTATGTTAAATATCTTTGCCA	AAATAGTATATTTCACTTACTTACACTAATGCATTAATGA	AAAGAGACATATTTGAACCTCGAACAA
BICF2S2413175	5	59661467	56660509	A	0.008961	0	0	0.1	0.7708	0	0	G	0.991039	1	1	0.9	0.2292	1	1	GCAGTTAGAAATAGCCCAGTCTCAT	GCAGTTAGAAATAGCCCAGTCTCAC	GCTGCCTAATTGCTGCATGTCA	GGCGTTCGGACAGCATTTG
TIGRP2P116705_rs8955982	8	8453089	5447212	A	0.009025	0	0.02143	0.04	0.7803	0	0	G	0.990975	1	0.97857	0.96	0.2197	1	1	AGAAAGTGTACCTTTTTCCCCCT	AGAAAGTGTACCTTTTTCCCCCC	GGGTCACCAGGAAGACAGGAA	TGACACCTGTTTGACAAAAAGCA
BICF2P1163317	36	32787450	29757924	A	0.01246	0.005376	0.007143	0.08	0.7992	0	NA	T	0.98754	0.994624	0.992857	0.92	0.2008	1	NA	CTCCACCAGACACTGCGATATATATT	CTCCACCAGACACTGCGATATATATA	GCTGCTTTCGGTCGCTCA	CTACGAGATGATACATGGCAGC
BICF2G630402763	30	27734006	24741573	A	0.0125	0.002703	0	0.12	0.7481	0	NA	G	0.9875	0.997297	1	0.88	0.2519	1	NA	GCAATCTACACATGAATTCCTCCCAT	CAATCTACACATGAATTCCTCCCAC	CCCCAAAGTTTGCCTGGGT	TCTTGTCTTAATTTGACAGGGTTCAG
BICF2P291984	1	99091704	96022576	A	0.01254	0.01902	0	0	0.7614	0	0	T	0.98746	0.98098	1	1	0.2386	1	1	GCCTCGTCAGATGATGGATACT	GCCTCGTCAGATGATGGATACA	TCCAGTGCCAGTATCAGTTGCT	GGAATATACTTTGGCAGCCTCG
TIGRP2P303764_rs8754818	23	29244070	26192656	A	0.01386	0.002688	0.06452	0	0.767	0	NA	G	0.98614	0.997312	0.93548	1	0.233	1	NA	CCCCAATCCCTTCCTCCTT	CCCCAATCCCTTCCTCCTC	TCTGCAAGGCAATCCAGATCCT	TCTCAAAACCTAGAAATTGATTCCCC
BICF2G630703836	3	20505717	17621267	A	0.01423	0.002688	0.01429	0.1	0.7643	0	0	C	0.98577	0.997312	0.98571	0.9	0.2357	1	1	TGCAATTGAATGGAAAGAACTTGTGT	TGCAATTGAATGGAAAGAACTTGTGG	TGTCCACAGAGGCCTCAATCC	GACTGTGAGGCAGGAAATGTT
TIGRP2P382710_rs8664655	32	31172677	28250646	A	0.01439	0.005464	0.04286	0	0.7414	0	0	G	0.98561	0.994536	0.95714	1	0.2586	1	1	GTCTTATCTGAGTTTTCTGGGTGCTA	TCTTATCTGAGTTTTCTGGGTGCTG	CAAGCCTGTGGTGGAGTCAAA	CTCACTGATATTCTAGATATACATTTCTGTGG
BICF2P225206	5	41978918	38980087	C	0.01619	0.02459	0	0	0.7595	0	0	T	0.98381	0.97541	1	1	0.2405	1	1	GGCTTTCTGGCAGCATCTTAC	GGCTTTCTGGCAGCATCTTAT	GGCCCAGGACCACGTCT	GCACAGTTACCTGCTGGAG
BICF2G630580879	6	48887492	45830988	A	0.01786	0.02703	0	0	0.7787	0	0	G	0.98214	0.97297	1	1	0.2213	1	1	ACATCAAATTTAAGACAGATGCTAAGGAGT	CATCAAATTTAAGACAGATGCTAAGGAGC	TGGAAGACACCACATTAATGAGACATTGA	AACTGTTCTGCTTTTATCCTCCAAA
BICF2P153324	1	109525478	106637455	T	0.01792	0.02174	0	0.04	0.7719	0	0	C	0.98208	0.97826	1	0.96	0.2281	1	1	CTCCCATCAGCCCTTATCCTT	CTCCCATCAGCCCTTATCCTC	GGCAGCTGAAGCAGAACCA	TCTCCATCCTCTGCCCAC
TIGRP2P393486_rs8750163	34	12339549	9332550	A	0.01964	0	0.02143	0.16	0.7727	0	NA	G	0.98036	1	0.97857	0.84	0.2273	1	NA	TGGACTGCTTTCAGATGGCA	GGACTGCTTTCAGATGGCG	CAAGGCATGAAGGCCTGAGC	CGCCCTGACTTCCCTCT
BICF2P1059843	15	66003018	62984608	G	0.01971	0.02446	0	0.04	0.7803	0.1667	0	A	0.98029	0.97554	1	0.96	0.2197	0.8333	1	AAAGCTGGAATTAGTTATTGTGATGGC	CAAAGCTGGAATTAGTTATTGTGATGGT	CGTTTGCATGCACACATTGGG	TTGAATATTAAGGCACAAAGCTGGA
BICF2P1029924	10	15148009	12158740	G	0.025	0.03514	0.007143	0	0.7538	0	0	A	0.975	0.96486	0.992857	1	0.2462	1	1	GTTCAGATTGAGGCCTAATGTTGTC	GTTCAGATTGAGGCCTAATGTTGTT	CGGACCCAGGAATGGTACATCT	GGGAAAAAGAAACTTACTCAGGAGA
BICF2G630128194	37	13737113	10737257	C	0.02669	0.02419	0	0.12	0.7652	0	0	T	0.97331	0.97581	1	0.88	0.2348	1	1	TCCCCTAACCTTTTTATACAGCTGG	ATTCCCCTAACCTTTTTATACAGCTGA	TGCCCCAAAGCTGCCTCTA	CGAACCTGAGAAAACTATCCTCAT
BICF2P711452	22	47524793	44576904	T	0.02669	0	0.1071	0	0.7746	0	1	C	0.97331	1	0.8929	1	0.2254	1	0	GCCTTAGTTTCAGGCAGCATTCTAT	CCTTAGTTTCAGGCAGCATTCTAC	AAAATCATAATAACTCCTAAGTACATCTACACCTGTTAAA	GCTTTTGTCTTTGAAGTGGAGC
BICF2S23526960	1	22764373	19757907	C	0.02679	0.04032	0	0	0.7819	0	NA	T	0.97321	0.95968	1	1	0.2181	1	NA	CTTCAGTGTATCTGACTGGGAGAG	CTTCAGTGTATCTGACTGGGAGAA	TCACTAGGCTTCCTTGAAGCAAAAGT	GCCTGTTTCTGAAGTCAAGTTCTAC
BICF2P1031850	7	61041974	58062043	C	0.03214	0.01081	0	0.28	0.7405	0	0	A	0.96786	0.98919	1	0.72	0.2595	1	1	TCAGCAATCCCTGAAGATGGG	TTCAGCAATCCCTGAAGATGGT	GGCCCAAGTTGCTGGTTTGA	CACTTGCAAGGGTTTGTTATAAACTT
BICF2G630186763	5	46106356	43104209	C	0.03393	0.002703	0.1286	0	0.7405	0	0	T	0.96607	0.997297	0.8714	1	0.2595	1	1	AAGTGTGTGTTTGCATTTCCCTC	AAAGTGTGTGTTTGCATTTCCCTT	GGCTTGCATGCAGACTGTGTA	CCCAGTAGTATGTTGAGAATCAGTG
BICF2S2312188	18	55597108	52571108	A	0.03559	0	0.05	0.26	0.7481	0	0	G	0.96441	1	0.95	0.74	0.2519	1	1	GCATCCCTTTCCCAGCACA	CATCCCTTTCCCAGCACG	TGCCCAGATTTGCAGACCCT	AGAGATAGAGGTTAAGCTTATGCCA
BICF2S23626182	1	9024048	6020825	A	0.03571	0.002703	0.1357	0	0.7273	0	0	G	0.96429	0.997297	0.8643	1	0.2727	1	1	AACTCCTTGCTTGACTGCAGA	ACTCCTTGCTTGACTGCAGG	ACCTTCTTGGCAACAGCTCCT	TGAGTCACCCAGTTCTGGAA
BICF2P272829	20	39056905	36061130	A	0.03571	0.03243	0.01429	0.12	0.7595	0	0	G	0.96429	0.96757	0.98571	0.88	0.2405	1	1	GAGATATGTGCCACTTCCAGGT	AGATATGTGCCACTTCCAGGC	GAACATGGCCAAGTGACCCG	AGCAATGAAATGCAGCAGAGG
BICF2S2305942	37	21134084	18134408	T	0.05536	0.002703	0.15	0.18	0.7481	0	0	G	0.94464	0.997297	0.85	0.82	0.2519	1	1	GCTGGCGTTGATGCAGTT	GCTGGCGTTGATGCAGTG	ATGAAGCTGTCTCCCGCCT	GCCAAAAATAACCATGCTTTTGAGT
BICF2P1138616	5	66239640	63241590	T	0.06964	0.07297	0	0.24	0.7871	0	0	C	0.93036	0.92703	1	0.76	0.2129	1	1	CCACTAGTGAGAAAAGCAAGGTGATAT	CACTAGTGAGAAAAGCAAGGTGATAC	CCCAGGGGCACTCTCAGTAA	AGTGAATTTGAATCCTGAAAACCCA
TIGRP2P247920_rs8757526	18	32992399	29972549	C	0.07651	0	0.2571	0.14	0.7633	0	0	T	0.92349	1	0.7429	0.86	0.2367	1	1	ACTTTCCTGCTTCCTACCATGTTAG	ACTTTCCTGCTTCCTACCATGTTAA	AGTGCAGACCAAACTAGGGTGT	CTGCCTGGACTGTCTTCTTTT
BICF2P1262794	19	54243545	51221400	T	0.08423	0.02446	0.2286	0.12	0.7765	0	0	C	0.91577	0.97554	0.7714	0.88	0.2235	1	1	GAATGAGACCAGAGACTGGCA	AATGAGACCAGAGACTGGCG	TCACTGACACAGGCACCATGT	TGGAAGGAATAAATGGAATGAGACC
BICF2P41054	25	15301483	12314463	T	0.08423	0.05435	0.01429	0.5	0.7822	0	0	C	0.91577	0.94565	0.98571	0.5	0.2178	1	1	TCAAATATCCCATGGGAAAAGTCACA	CAAATATCCCATGGGAAAAGTCACG	TGCCTTGGAACACCACTCGT	ACATCTCTTGGGAAGAAGGCAT
BICF2P1060759	33	17172826	14129974	T	0.1385	0.0765	0.2714	0.22	0.751	0	0.1667	C	0.8615	0.9235	0.7286	0.78	0.249	1	0.8333	CCCCGAGGTCTACGAGCA	CCCGAGGTCTACGAGCG	TGAGTGCCAAACCCGTGAGT	GCTGGTTGCCCCTTGTAG
BICF2S23241117	29	13728341	10725198	C	0.1405	0.0419	0.4143	0.08	0.767	0.6667	0	T	0.8595	0.9581	0.5857	0.92	0.233	0.3333	1	TGAAGCTCAAGTATATAAATGCCCCTC	TGAAGCTCAAGTATATAAATGCCCCTT	TGCTGCCCAACCCCTACT	TGGAGAGCAGCTTACTTGATAGT
BICF2P1168261	9	47831552	44506593	C	0.1732	0.1108	0.4	0	0.8144	0	NA	T	0.8268	0.8892	0.6	1	0.1856	1	NA	GCCAAAGACTGTTAGTATATACCATAGAAGAG	GCCAAAGACTGTTAGTATATACCATAGAAGAA	AAAGGGGATATTATTAAGGTGATAAATAATTAAAAGTCAA	AGAGAGATAAGCATCTGCCAAAGA
BICF2S2449563	22	55350528	52403809	T	0.2339	0.227	0.3286	0.02	0.7576	0	0	C	0.7661	0.773	0.6714	0.98	0.2424	1	1	CACGGAGAACCTGGGAGAA	CACGGAGAACCTGGGAGAG	GCACTGGTCCCAAGGGTG	CAACTTACTGACGCAGAGTAGAAAT
BICF2P223300	4	28963470	25752965	C	0.7143	0.95956	0.7571	0.7	0.1873	1	1	T	0.2857	0.04044	0.2429	0.3	0.8127	0	0	GACAAAACACATGGAGTGGGG	AGACAAAACACATGGAGTGGGA	CCACCTAAACATTTCTTAAAATGTTCTCTCCA	GCAACACAGACCTGCTTGA
BICF2P608527	35	16606065	13596736	T	0.7661	0.92973	0.6857	0.82	0.2605	1	1	A	0.2339	0.07027	0.3143	0.18	0.7395	0	0	CCAATAGCTGCTCACAAAAAATAGGT	CCAATAGCTGCTCACAAAAAATAGGA	CCTGCCTTGGAGGAAAGGCT	GGGTACTGAGCAGAAATCCAA
BICF2P363248	38	10272184	7272383	A	0.8297	0.94624	0.5	0.8913	0.2308	1	0	G	0.1703	0.05376	0.5	0.1087	0.7692	0	1	TGTCCTGGCTGTCCTGGTA	GTCCTGGCTGTCCTGGTG	CAAAAGAGGAGAGAGGTGTCCTCA	GTCATTTGCCTCTTCTCAATCTCT
BICF2P263751	23	44284984	41233232	G	0.831	0.7919	0.96875	0.8649	0.04167	1	1	C	0.169	0.2081	0.03125	0.1351	0.95833	0	0	GTGCTGGAAAAATCAGTAAACAGTCTAG	GTGCTGGAAAAATCAGTAAACAGTCTAC	GTGTTAGGATCAGCTAATTAAGTTTCATTTCTTCTC	AACATGGACAAGAAGCAAAAGAGA
BICF2P1165732	17	39102934	35992400	C	0.8433	0.98864	0.5896	0.98	0.2656	1	1	T	0.1567	0.01136	0.4104	0.02	0.7344	0	0	GTGTGTTTGTTACCGGGCG	TGTGTGTTTGTTACCGGGCA	ACTTCCCGACGGCGCT	GAGAACACACCAGGAGTCAATG
BICF2P259521	1	51632306	48589923	G	0.94107	0.91081	1	1	0.286	1	NA	A	0.05893	0.08919	0	0	0.714	0	NA	ACAGTGGGGTCAACACTCG	GACAGTGGGGTCAACACTCA	AGCACTGTCACTCTGCACACA	AGCAAACAAAAACAACACATTTAAGACA
BICF2P1448058	15	47012442	44001348	A	0.94182	0.92582	0.97826	0.95833	0.2442	1	1	G	0.05818	0.07418	0.02174	0.04167	0.7558	0	0	TGAAAGGAATTCTCCATGTCCCA	TGAAAGGAATTCTCCATGTCCCG	TTTTTCACTAGTCATTGTGAATGGAATTGGG	GTTGAACAGGAAGTAGTCTTCCC
BICF2P697921	9	38627593	35306037	C	0.95863	0.95628	0.95	1	0.2318	1	1	T	0.04137	0.04372	0.05	0	0.7682	0	0	GCTTGTCAACGTTCCTGATTCAAG	GCTTGTCAACGTTCCTGATTCAAA	CAGAGCAGCACCGTTGGG	TCTGCTCAGAGGCAGGG
BICF2P1191359	20	50991317	47988327	G	0.96992	0.95322	1	1	0.2264	1	NA	T	0.03008	0.04678	0	0	0.7736	0	NA	ACAACCATTTGTACCCCCCTC	GACAACCATTTGTACCCCCCTA	CCTACCCACTGGTTTGGTGC	ATAGACAGTGGTTGGTTGCAAAT
BICF2G630165989	6	17930754	14921568	T	0.97331	0.95968	1	1	0.2178	1	1	C	0.02669	0.04032	0	0	0.7822	0	0	CTCCTGAGACCTAAGGGCA	CTCCTGAGACCTAAGGGCG	TTCTCTGGCTCTGCCTTTCCT	CAATTCTAGGAAAAGGCAATGAGC
BICF2P1368599	31	19102533	16093860	A	0.98393	0.997297	1	0.84	0.267	1	1	G	0.01607	0.002703	0	0.16	0.733	0	0	TCTTAGTTGTCGTTTCTATGGCCA	TCTTAGTTGTCGTTTCTATGGCCG	ATGGTGATGACAATTTGCTGGGAAAA	CAGCTATTCACTGTCACTTCCTC
BICF2G630126293	37	9384374	6384447	C	0.98577	0.98387	0.98571	1	0.2765	1	1	T	0.01423	0.01613	0.01429	0	0.7235	0	0	CATGAAGGGCACATGGTGG	TCATGAAGGGCACATGGTGA	GTCTCCGAGCAAAGTGTAATTTGATGAA	CATGTTTAGTCTTAGCAAACAGGGA
BICF2P866415	27	19433864	16423267	A	0.992857	0.994595	0.992857	0.98	0.2376	1	1	G	0.007143	0.005405	0.007143	0.02	0.7624	0	0	CAATAAGGAAACTTGGCCTTTGTCAT	AATAAGGAAACTTGGCCTTTGTCAC	GGGCAAACACTTTCATACTGAAAAGTTCT	CCTCTAGGAGGCAGCATAATATAGT
BICF2G630409723	30	17278701	14288568	G	0.992857	0.994595	0.98571	1	0.2863	1	NA	A	0.007143	0.005405	0.01429	0	0.7137	0	NA	ATCCCCTCTTCTAGAGTTTTGCG	CATCCCCTCTTCTAGAGTTTTGCA	AGTCCAAACCCAGGTTAGGCA	GTTTACCATGGCCATGTTCACTAT
BICF2G630340139	3	44667313	41810394	T	0.992883	0.98925	1	1	0.2412	1	1	C	0.007117	0.01075	0	0	0.7588	0	0	CCTTCTTCCATATGCTAGGTGCTTT	CCTTCTTCCATATGCTAGGTGCTTC	ACCATCAGACACGACTGGGG	GGGTCTGTGTTTTCTCCTTTTGG
BICF2P924889	19	7778424	4776127	T	0.994624	0.991892	1	1	0.2917	1	1	C	0.005376	0.008108	0	0	0.7083	0	0	ACAATTTTATTCCCCCATTCTACCCA	CAATTTTATTCCCCCATTCTACCCG	TGGCACAACATGCACACAGG	CCAATGTAAGGTAAAGAGTAAGAATATATTCTTCA
BICF2G630276750	28	10728062	7729556	C	0.996416	0.997283	0.992857	1	0.1856	1	NA	T	0.003584	0.002717	0.007143	0	0.8144	0	NA	GACCAGAGAAAGAGCCCTATTCC	GACCAGAGAAAGAGCCCTATTCT	GAAGTGCTCCAGCAGGGC	GTCTCCCTGGAGGGCA
BICF2P1181690	2	30694632	27851826	A	0.996429	0.994595	1	1	0.1818	1	0	G	0.003571	0.005405	0	0	0.8182	0	1	AGACTGGAATTTTAAGGGTTCGCA	GACTGGAATTTTAAGGGTTCGCG	AGGCAATATTAGCAAAATGAGAACAATATGACTTTT	TCTTCAGTGGTTTGTAAGGCAAG
BICF2P758526	7	25318558	22349761	G	0.996429	0.997297	1	0.98	0.2224	1	1	C	0.003571	0.002703	0	0.02	0.7776	0	0	TGTCTCAATCCACATGACACCC	TGTCTCAATCCACATGACACCG	GGGCCAGTCCTGGTCTCC	GGAGGGATGGTCTCCACTT
BICF2P164675	5	5556488	2555798	G	0.996441	1	0.98571	1	0.2061	1	1	A	0.003559	0	0.01429	0	0.7939	0	0	GGAGTTTTATGCTGCTGAGACC	CGGAGTTTTATGCTGCTGAGACT	TGTTACTTATGGCTTCTCCTTGAAAAGACT	GACAACTCCGCAGCCC
BICF2P1167270	2	50717731	47852734	C	0.998214	0.997297	1	1	0.2689	1	1	T	0.001786	0.002703	0	0	0.7311	0	0	TCCCCCTCCCTTCCTCTC	TCCCCCTCCCTTCCTCTT	GCAAACAAAAGAAGCCAGGAAATGGT	CTTTTTTAGGGTCACAGGTCTCT
BICF2G630100094	25	34689509	31699552	A	0.998221	0.997312	1	1	0.1913	1	1	T	0.001779	0.002688	0	0	0.8087	0	0	GCAAACCTATAAAGTGCTTTCTTGTGT	GCAAACCTATAAAGTGCTTTCTTGTGA	GGAAAATGCAGGCCATATGGTCA	GGTGGCAAATTGGCAAACC
BICF2P239653	16	15476260	12524995	G	0.998221	1	0.992857	1	0.2576	1	1	C	0.001779	0	0.007143	0	0.7424	0	0	CCTCTAAAGTCTGTGCACATCAC	GCCTCTAAAGTCTGTGCACATCAG	ACCCACACATCCCTTCTCTGC	TCTCGTTGCTTTCCCAAGTG
BICF2P57528	24	3521504	523951	C	1	1	1	1	0.2148	1	NA	T	0	0	0	0	0.7852	0	NA	CCGGGCTGGATTTGAACG	ACCGGGCTGGATTTGAACA	CCTGGCTGTGAAGCAGAACA	CGCAGATACGCTCTTCCAG
BICF2G630197064	26	38215092	35147391	C	1	1	1	1	0.2424	1	1	T	0	0	0	0	0.7576	0	0	GGGAACCCACGTTATGCTATTTC	TGGGAACCCACGTTATGCTATTTT	GAGACAAATAAAGCAAACCTTTAGATTTGTGTGA	CTGAGTTCTGCTCCTTAGGC
BICF2G630662749	13	35146152	32107117	A	1	1	1	1	0.251	1	1	G	0	0	0	0	0.749	0	0	ATAAATAAATAGTAACTCACTCCTCTGCTTGA	AAATAGTAACTCACTCCTCTGCTTGG	GTCTACTTGCTTAAAATATACAATGCCTAGTCAC	CCAGGCACACATTTTGCATAATAAA
BICF2P201328	34	24537278	21526852	C	1	1	1	1	0.2567	1	1	T	0	0	0	0	0.7433	0	0	CTCCTGGACAAATGGGAAGAAC	CCTCCTGGACAAATGGGAAGAAT	TCAGTTCAAATTATTAAGCATACTATATAAAGTGACCATT	CCCTTAAAGCAAAGATTGGTCTCC
BICF2S23344205	37	3943109	943096	C	1	1	1	1	0.2595	1	NA	A	0	0	0	0	0.7405	0	NA	TGCACCCAAGTGTAACCCG	TTGCACCCAAGTGTAACCCT	TTCCAAGGAGTTGCAAGTGCG	CTTCCTTGCACATCACCTGTC
BICF2P400484	8	56398878	53361907	G	1	1	1	1	0.2917	0.8333	1	A	0	0	0	0	0.7083	0.1667	0	TGGAACTGCTGGGCTACAG	TTGGAACTGCTGGGCTACAA	CCTCCTTCTATCACTCTTAACTACCCCA	CAGATTATGACCTAACGTGCCTT
BICF2S23225775	14	27153238	24204531	C	1	1	1	1	0.3053	1	1	T	0	0	0	0	0.6947	0	0	CCAAAGAAACTTATGCCCCCAG	CCAAAGAAACTTATGCCCCCAA	CCTCTCAAGCCAAGTTGAAAGAAGG	CAGCATGGGTCATCTCATCTC
BICF2S2305845 †	17	22151713	19170438	G	NA	NA	NA	NA	NA	NA	NA	A	NA	NA	NA	NA	NA	NA	NA	GGAGTTGTCTTGGCACCCC	GGAGTTGTCTTGGCACCCT	GCTCCTTCTGCCTCAGTTTCC	CCCTTACATGGTGTGTAATTTGGA
BICF2P1334457 †	19	9970522	6970430	A	NA	NA	NA	NA	NA	NA	NA	G	NA	NA	NA	NA	NA	NA	NA	CAATTTTCCATTCAGACAGGCACA	AATTTTCCATTCAGACAGGCACG	CCAGGCTTAGGAACCAAGACACA	AGTGAAGTACATAAATAAATCTGGCAAACA
BICF2G630504215 †	24	21819458	18822452	C	NA	NA	NA	NA	NA	NA	NA	T	NA	NA	NA	NA	NA	NA	NA	CCATGTGTCATAGCTGGGATCC	CCATGTGTCATAGCTGGGATCT	TGGCATTCGGAAGACCACTGA	CCACGTTATAGAGTCTGATGGGAT
† These SNPs were filtered out from the final dataset due to low genotyping rate
†† Only 3 and 4 samples for golden jackals and foxes, so the allele frequency is not representative of the population

## Sheet: Other tested SNPs
SNP name	Chr	Position (CanFam2)	Position (CanFam3)	Allele 1	Allele 2	ASP1_SEQ	ASP2_SEQ	LSP_SEQ	STA_SEQ
BICF2P1248726	1	77205567	74149655	A	G	CATCGTTTCTACTCCTTATAACCACCT	ATCGTTTCTACTCCTTATAACCACCC	GCACAGATACTTTTCTTTCATTTGTGGCT	GTTTGGAGAAGAGCCCACC
BICF2G630708417	1	7285492	4283592	A	G	CTTTATTTCATCGCTCTGTTTCAGAGT	CTTTATTTCATCGCTCTGTTTCAGAGC	CCCTAACCATTCCACAAGCCC	CACTTTATTCATGGCTGATGTTGC
BICF2S23430831	1	52570732	49526248	T	C	CATGGAGGGTCTGACCCTTTTA	TGGAGGGTCTGACCCTTTTG	TCCCCCTGTAGGTTTTCCCATT	GCTCCCTCATGGGATTTCTC
BICF2S22916508	1	70001988	66946428	A	G	AAGTCTCTGGAGAATTGAAGAAACTGA	AGTCTCTGGAGAATTGAAGAAACTGG	CGTGTGATATGCACAGAAACTATTCTTCC	GAAGTTTTGGAGAGTGTAAAGTCTCT
TIGRP2P16985_rs8552105	1	23457346	20450940	C	T	AAACACCAGTGAAAGCAAGCATAC	TTAAAACACCAGTGAAAGCAAGCATAT	CCCATATAGAATGTGGCAAATGTTCTGAA	CTGCTTTTGGCTTCCCCTTA
BICF2S23260488	1	74219408	71162763	A	G	CGAGAGCATTTTCCTTTGATCAATTTCA	CGAGAGCATTTTCCTTTGATCAATTTCG	CCTGGGTGGTCTCTGAACTCT	TGGTAACATATAATCAGCTTTCCTGC
BICF2G630716415	1	32912379	29869145	C	T	GAAACCAGTGCAAGCTGACTAC	GGAAACCAGTGCAAGCTGACTAT	AGCCACATTGTTGGAGACTGTGA	CCCCATCCACCTGGGAA
BICF2S23258513	2	31799697	28955479	T	A	CGTACATACGTCCTCTGGGACA	CGTACATACGTCCTCTGGGACT	TGCCGGGTGGAGAACGAT	GGGAACTAATGGAAATGTTACGTCC
BICF2P1195426	2	81572689	78678534	A	C	AGTTACCAAACTTACTGACAGTTAAACCT	GTTACCAAACTTACTGACAGTTAAACCG	TCCCACACATGCCTCGGG	CTCATCAAAGTTGTTAAGGAAGAGGT
BICF2P541712	2	42206098	39356128	T	C	GAAGCAAGCATTTTATTTCACAAATAGTCAT	GAAGCAAGCATTTTATTTCACAAATAGTCAC	CCTGCTCCTCCCACATTCTGA	CCTGACAAAGTGTAGGGATAATGAA
BICF2P723944	2	38922832	36073089	A	G	CCACAGGGTCTTTTCATGTTCAGA	CACAGGGTCTTTTCATGTTCAGG	CACACAGATGCACACAGCCA	TGCTTCTTTAAGGGATCATTATCTGC
BICF2S23434954	2	55306711	52436138	A	G	TGGCATGCCTATCAACACCT	TGGCATGCCTATCAACACCC	TGCCCTGAGAAGAGGCAAGT	CCTTAGGCCAGAACCATTGT
BICF2P547826	3	93287324	90459669	G	A	TGAAATATAAATTATGCACGAATGGTTCCG	TGAAATATAAATTATGCACGAATGGTTCCA	CACAAAAGTACTAAATGACATGTTTTAGTATAAATACTAT	GAAATGACTTGAATTGGATGTCTGAAA
G233f29S171	3	25427121	22543894	G	T	GTTACCTACTAAGTAGGGATGAAAAGTCTG	GTTACCTACTAAGTAGGGATGAAAAGTCTT	TCTCCCTCTCCCTCATCTCAGAA	TTGTCATGCTTCCTTTGCTTAGAT
BICF2S22947559	3	61835833	59016055	G	T	CAACTTGTTCTTCTAATTACTCCACCC	CCAACTTGTTCTTCTAATTACTCCACCA	TCAGGGTGAGTGGCAGCA	TCAGGCCTGGATCTTCCC
BICF2P1160261	3	76009002	73183348	C	T	GAAATTTTCTGAACACAGTGTGTTCATG	GGAAATTTTCTGAACACAGTGTGTTCATA	GGGAAAAAAAGTTGAATCTGCTGAAGACA	AGCATTTCTCTACCAGGTATTGGA
BICF2P93316	3	83669119	80846339	T	C	CCAGCAGCTGGGAAGTTAGTT	CCAGCAGCTGGGAAGTTAGTC	TCCAGTGCAGAGCCTCCAA	GTCTTGCTGGCAACATCCC
BICF2P750212	3	60257942	57394928	A	G	AAAGCAATATTAACTTTGGAGGTTGGAA	AAAGCAATATTAACTTTGGAGGTTGGAG	TCTGTGAATTTTTATTTCAATTACTGATAACAGCATGT	CCCTGAAAAAACAAAATACAATAACCAACA
BICF2P181287	4	91466646	88259417	T	C	CGTAAAACTCCCAGGATGGAGT	CGTAAAACTCCCAGGATGGAGC	CTATGGGCCGTGAGCAGC	GCTCACTCTTTGGTTCAAGCC
BICF2P1324212	4	49273672	46070846	G	A	TGAATTTTGACTAAAACAATCCATCCCG	TTATGAATTTTGACTAAAACAATCCATCCCA	ACATACTTCACTCAGGATTAATAAGTTTTGAGGG	ACTTGAATATTTTTAAGGAAAAGTAAATATTATGATCATT
BICF2P1334368	4	32788512	29578714	C	T	CCTGCTTGTGACATCCCG	GCCTGCTTGTGACATCCCA	AGGTTCCCTGTGCAGGTCC	CAGTTCTTATTAAGGAGAAGGCAGC
BICF2P1433082	4	25758461	22547366	G	A	GAGCATGTATAATCAGAGGAGGGG	GAGCATGTATAATCAGAGGAGGGA	AAGGGCTAGGCTGGCCTAC	GCTTCTGGAAGCTCAGGG
BICF2P742360	5	68009762	65013617	T	C	GCAAAAGCCAGACGTGTACT	GCAAAAGCCAGACGTGTACC	GCACGGCTGTGTGCCT	CCCGGAAAGGAGCGATAAGA
BICF2S2412625	5	74810286	71804501	T	C	CAAATATAAAATGCAGATGTTGGACACTGA	AATATAAAATGCAGATGTTGGACACTGG	GCCTACCTGCATGATGACCC	CTAGTTGGGCTAGAGACTCCATA
BICF2S2459689	5	39025380	36032999	T	C	CTACAGCTGTCTTGACTGCTCA	ACAGCTGTCTTGACTGCTCG	GCTTCAACAGCTGGTGAGGG	CACTGGGAGAAAAAGGCCTC
BICF2P652278	5	57954486	54952643	T	C	TGGAAAGGTTATCACTAGAAAGAATATGAGT	TGGAAAGGTTATCACTAGAAAGAATATGAGC	TCCACAACTGTAAGACAGACGGTG	GGAAGCTACACGTTGTGGAA
TIGRP2P71121_rs8749800	5	44369645	41370228	T	G	GTAACAGGAGGTACTTCCAAAGGA	ACAGGAGGTACTTCCAAAGGC	CAGGGGGTGGGCCCATA	GCAGTGTGCAAATTTGGATCAA
BICF2G630582485	6	47231693	44168333	C	T	CCCTTAAGGCCAACTTCTCTCTG	CCCTTAAGGCCAACTTCTCTCTA	CAATTGATTTTGCCTGGGAGGATCT	ACTCTCCTTTTTCAAGGCTGC
BICF2P558739	6	62020121	58960364	A	G	CACAGATTATGTGGCTCCTGGA	ACAGATTATGTGGCTCCTGGG	CTCCAGAGATGCTAGGTGCTGA	CGTGCAAATCTGCTAGATACCC
BICF2P385532	6	75368737	72306419	C	T	CTCTCTTCCCTCAAATGTATGCAAAAG	CTCTCTTCCCTCAAATGTATGCAAAAA	TCCTTTTGACTTCCTTGGAGATTGTTAGAT	TGTGTCTTCTTTCTGTCTCTCCT
BICF2P176847	7	58159113	55178223	C	T	CCATATAGAGAACTGATTCCTATCACCAG	CCATATAGAGAACTGATTCCTATCACCAA	CCATCAGAAATTGCATTGGAGGGAA	CTCTTGCCTAGTCTCCTTAGTTTTC
BICF2G630554634	7	31110259	28143067	G	A	GGTGAATGTTCTCCATTGACCG	GGGTGAATGTTCTCCATTGACCA	TCAAAATAACTCAATAGGGCTATTGGATGGA	TTTTAGGAACATTCCTCCCATGC
BICF2S23537383	8	51475506	48437247	T	C	GACCTCAACACTTCTGTTCCTAGTAT	GACCTCAACACTTCTGTTCCTAGTAC	CCCATTTGGGAAACTGGCCAA	CCTCCCAAAATCAGAAACTAAGGT
BICF2S23625139	8	37547934	34517945	T	C	GCTTTTGTAGTCTTTTCCTTAGACTCCAT	CTTTTGTAGTCTTTTCCTTAGACTCCAC	ATGAAATATGAATAGGCCTTTAGAAAAGTGTTATATCTTA	ACAGGGAGCAGGCAACT
BICF2S231667	9	31641537	28318220	C	T	AGAGCTTTATCACCAAGTCCTTCTAC	AAGAGCTTTATCACCAAGTCCTTCTAT	ACCATAGCAGTGTATCAGTCAGAATGG	CTATCATTAAGGTGAGCACAAGCA
BICF2S23743595	9	32787377	29464602	A	G	CGCTTTCAGCAGAAAGGGAATTTTAAA	CGCTTTCAGCAGAAAGGGAATTTTAAG	TCCTCATTTTTACTTTCCCCTTTCTTTTTGG	TTGATGGAATCAAGCAGATGACG
BICF2P1331932	9	56292817	52947437	T	C	CCTGTACAGAAGGGCTGACA	CCTGTACAGAAGGGCTGACG	CCAGCCTCCCCGTCCT	TCCCTCTTTCCCCCTTCC
BICF2P912680	9	51060361	47733089	C	A	CTCAACCAAGCTTGTCAGCC	ACTCAACCAAGCTTGTCAGCA	GGGAAAAGTCCCAGGTCCCA	CAAAACCCTTATTTGCCTTGTAAATCA
BICF2S23241552	9	62634002	59293285	A	G	ACCTTTGACCAATGGACTCCAT	ACCTTTGACCAATGGACTCCAC	GGAGCCAGGAGAACACATCTGA	CCCTTTCTAGCTGGTCCCC
BICF2P1270711	10	7694400	4709463	A	G	CCTTTACCTTTTGTTACTTTGGTCAGA	CCTTTACCTTTTGTTACTTTGGTCAGG	AGTGCCAGGAACCCGCA	CTGCTTGACTTTTTTCCCTTTACC
BICF2P590306	10	68942918	65788249	A	G	GCTGCTAGCTGACCTCTTCA	GCTGCTAGCTGACCTCTTCG	GAGAGCCCGGTGATCTCGA	GCCCCGTGATTTACTTCATCA
BICF2P324205	10	49315986	46188829	G	A	GCAACAAATGCTATAAAGGAGTTAAATGC	AGCAACAAATGCTATAAAGGAGTTAAATGT	CTCCACATCAGGATCTGGCTCA	CAATGCGAAGCAACAAATGCTA
BICF2G630304255	11	63156122	60127480	A	G	ATTAGCAGCATATGGCTGTCCTATAA	ATTAGCAGCATATGGCTGTCCTATAG	CAGCAGGCAACCCAGCA	TGTAGCATCAATCAGATGTCAACATT
BICF2P292180	11	46860855	43831514	T	C	GTAACACTTACTGGACTCTCACCTTAATA	ACACTTACTGGACTCTCACCTTAATG	CAAAATGTGAAGTACCCGGCAAGT	CCGCTTTACTAAGAATGGAGGAAG
BICF2S23655353	11	69345277	66314997	G	A	CAACTATACTCCCTCTACAGCACC	ACAACTATACTCCCTCTACAGCACT	GCCAGATAATACTAATATAGTACTTGGCAAATATTAACTC	TACTGAGCAGCATTGAATTACAACT
BICF2G630297140	11	25266339	22258742	A	G	GGCCATGAGTCACAAATTACCAA	GGCCATGAGTCACAAATTACCAG	CCTCCTCACTGGCTGGCAAA	TGCCCATGGTCAGAGACA
BICF2S2306554	11	17199715	14195555	A	T	GGCATCACTCTTGGGTTCTTCAA	GGCATCACTCTTGGGTTCTTCAT	GGCAGCACAGAGGGCCA	CCTCCTGTCAGTCTTGCCT
BICF2P1192641	12	56919428	53918238	C	A	TGCACATGGAAGTGGATCTCC	ATGCACATGGAAGTGGATCTCA	TCCTCCTTGGAGCAAGAACACA	AGCTATGAGCGACCTAAGACAT
BICF2P581017	12	28898732	25897168	T	C	GCTCTAGAAGGTTAACATTTGATGTTAATCA	GCTCTAGAAGGTTAACATTTGATGTTAATCG	CCGTATCTAGGTAGTGTACAGTATCTGATCT	ACGTAGGCTTATTTTGACTAGTTTCAG
BICF2P1426490	12	64017301	61016619	G	T	TTGTTAGTGTGCAAGCTGTTGTG	GATATTGTTAGTGTGCAAGCTGTTGTT	AGTAAATCCTGTCATGTTTAGTTTCACAGTCA	GCATTCTAAACACTTTATTGGGACTTG
TIGRP2P164447_rs8805986	12	42508598	39505848	T	C	ACTGAAGCCTTTAAGGAAGTGATACAT	ACTGAAGCCTTTAAGGAAGTGATACAC	GCACTGGGCATCCTAGGGAA	TCACTTCCATGATTCCCCACA
BICF2P344706	12	22948932	19947506	G	A	TGTGGTCCTTGATACAGACTTCG	CTGTGGTCCTTGATACAGACTTCA	ATCCACATGTCCTTCATGATGGAAGAT	AAATTAATCATGCTGTGGTCCTTGA
BICF2P711808	12	14564316	11560663	C	T	CCCACCGTTTGGGGAGG	CCCACCGTTTGGGGAGA	ACTTTCCACGGACACAGCCT	CTCCCTCAACCTCCTCTGT
BICF2S2336068	13	48041879	45108525	G	A	GCCTGAAATGAAATGATGCTAGCAC	GCCTGAAATGAAATGATGCTAGCAT	GGGATCTGTCCAGGCTCACA	AGTGTTTCTTTTTCTTTTCACTTTGCC
BICF2P983123	13	12052105	9014025	G	A	CAGAAGAGTGCAAAGGCACG	CAGAAGAGTGCAAAGGCACA	GGGAGCCTCGCAACAAAACA	GTGGTTTCATTTGCAAGGCAG
BICF2G630527650	14	37715922	34756929	T	C	CTAGTATTATCTTCTTCAGCTACACTTGGAT	AGTATTATCTTCTTCAGCTACACTTGGAC	TGCAGCTCTTTCTGCCAGTCT	GGCCAATAAATGCAAAGTGATTTCT
BICF2P1216688	15	3696989	697349	G	T	ACTAAAGACTTCAAGAAACAGGGTCTAG	AACTAAAGACTTCAAGAAACAGGGTCTAT	CAGTTTTAGGAACTATGCTAAATCCTAGGAATATGA	TTCATGTATGTCTGTCCTTCTCTACTT
BICF2S2352829	16	10229953	7251501	C	T	GGCATATGTTCTGAGGATAAAACGG	AGGCATATGTTCTGAGGATAAAACGA	ACAGGGTTTAGGCTGTTGCCA	GTCTGCAGTTTCTCCCCAG
BICF2G630111352	16	31993627	29040827	G	A	AAATTATTCTTTATGAAATGGTCTATGAAGTACCTC	AAATTATTCTTTATGAAATGGTCTATGAAGTACCTT	CCAAATTGAAATCCAGGAATCCAACTGA	TGTTCCAATACTGGTTGACATTACAA
BICF2G630847335	16	18014512	15066213	A	G	GTCTTCCTGCTTCTAGTTGGATGT	TCTTCCTGCTTCTAGTTGGATGC	GAGATACTGCTTTAAAGACACAGGGTCA	CACCCCAGTTAGTTCAGCG
BICF2G630207556	17	40261535	37150070	C	T	AGGTGATTACATCATCCCATCTCTTTTC	AGGTGATTACATCATCCCATCTCTTTTT	GGTGTCTGCATGAACAGTTTTGGT	ACAGCATCTCCATCCTGTTACA
BICF2P797744	17	23586816	20606032	A	C	ACTCAGAGGGGAAGGCTGA	CTCAGAGGGGAAGGCTGC	AAATTATATTTGAATGATATTTGTGGAAAATAGAAGGTTT	TGCAGAGTCCCTGGGC
BICF2P430719	18	56472383	53444473	G	A	CCTGGTCAGAAGCCCCG	CCTGGTCAGAAGCCCCA	CCCCAGAGGCATCGAGCTG	GTGCTCTCAAAAGGCACCC
BICF2P340794	18	14982699	11999152	C	T	GACCCTTCTCTAGCAGACCC	GGACCCTTCTCTAGCAGACCT	ACTGTATTGAGAGGCAGGCCA	ACAGTCTGAGTGCTACGGTG
BICF2G63043071	19	23635125	20621809	C	T	GCCCCCAGGAAAGTGGC	GCCCCCAGGAAAGTGGT	GGGTGACATCAGCCAGGACT	GAGCCAAACATCAAATGCACAA
BICF2P690052	19	49044174	46023384	T	G	CTCTCCCATGTCACTTGTGGAA	TCTCCCATGTCACTTGTGGAC	CCTGCGTCAGGGAGGACT	GGGCCTTTGGAAAATATGGTCAC
BICF2P1019450	19	32413989	29393062	T	C	GGAGGGATATACCTCTAGGACAAAAAT	GGAGGGATATACCTCTAGGACAAAAAC	CAGCACTCCACCAATATAGTTACCGA	TGCACAACCAAGGAGGGA
BICF2S23123229	20	45944339	42943687	G	A	TCCTTCCACTCACTGAAAGAATTCG	TCCTTCCACTCACTGAAAGAATTCA	CCTCTCCTGGCTCTTGACTGAA	GAGCCTTTTACCACCTGTTCT
TIGRP2P284084_rs9062333	21	34054114	30864790	A	G	TCTATCAAATAAATCTTCGTGCCTCTTAACT	CTATCAAATAAATCTTCGTGCCTCTTAACC	AAAAAGGGATAAATAATTTAATATATACATTGTGAAGTG	TCCTCTCTTAGATTCTTTTGGACTTCT
BICF2P52815	21	51707106	48514030	T	A	CAAGTACGCCTTTTCCATAACTTGA	CAAGTACGCCTTTTCCATAACTTGT	CCCCACCTCTACCTCCTCCA	TGCCAAATCTGCCATTCCTTTATAT
BICF2G630321255	22	20619764	17673448	C	T	TGGAGCATCTTGTGATAATTTTCTGC	GTGGAGCATCTTGTGATAATTTTCTGT	GCCATGTGGATACGCATTTTGATATTTTGT	GCAGTAGCATAATCCAAACAGGT
BICF2P739582	22	18850923	15904424	A	G	CCTTTCTTTGTCTTGCTGATTAACCTT	CCTTTCTTTGTCTTGCTGATTAACCTC	GGCAATCTGAGGAACAAGGCAA	GTAGATGGTGGCATGTTCCTT
TIGRP2P303209_rs9075554	23	26289293	23236937	A	G	CACTTTGCCTCTGCATTCTTCTT	CACTTTGCCTCTGCATTCTTCTC	CTCTGCATTTGGAGGCTGGG	ATTAGAGAGTGGGAAGAGTTCACTT
BICF2P1268177	24	37633119	34658488	A	G	CTGACATTTGAAACAGTTCTTTATCTGGA	TGACATTTGAAACAGTTCTTTATCTGGG	ACGGCAAGAGCTGAGACCA	AGTACAAACTCCCTTCTCTGACA
BICF2P92211	24	5179711	2179961	T	C	ATGCTTCCAGGTGTTTCCTATTCT	TGCTTCCAGGTGTTTCCTATTCC	CGTGCAGAGATGGTTTCCCA	CCCACTGAGAAAGGTGGACAA
BICF2P46265	25	18078566	15092459	T	G	CATCATATTCTCAACCTCTCAGAGACA	CATCATATTCTCAACCTCTCAGAGACC	TCCAGCCCTCCCTCAAATGT	AGAATGCATATGAAAACAGAGTTCCA
BICF2G630102018	25	36862617	33874702	A	G	TGGAGGCTCACTGTTTCTCTTT	TGGAGGCTCACTGTTTCTCTTC	TCAGAGAACCTTCAGGCTGGG	TCATTATGAACCCTGATAACTGCTCT
BICF2G630469072	25	13077688	10089861	A	G	CAGGGTAGGAATTAGAAAGAATACTGAGA	CAGGGTAGGAATTAGAAAGAATACTGAGG	ACAAACAAACAAACAAACAAAAACACACACA	ACTCCCATATATTTTAAAGAAGCTGATGT
BICF2P146997	27	47794957	44762316	C	T	GCTGAGACTAGAGCAGAACAAGAC	GCTGAGACTAGAGCAGAACAAGAT	CCTTCTCCCTAGCCAGCCG	GGGACCTCAGATTCCACTTTG
BICF2S22946651	28	25487216	22486757	T	C	GGCATTTATGTGGATTGAATCCCA	GGCATTTATGTGGATTGAATCCCG	CCAAGCAGAGAAGTTGGCCG	GAAAGCAGAGCCCAAGTGA
BICF2P991234	29	37934470	34943729	G	C	GAATTAACATTTGCATGACAACGTGC	GAATTAACATTTGCATGACAACGTGG	GGTTTGATTATCATAAATGAAGTTGGTGTCCT	CTTAGGTGGTGGACAATGTATGA
BICF2G630626298	29	28311535	25312246	T	C	TTGAAGACTTCTGCTGGTGGAA	TGAAGACTTCTGCTGGTGGAG	TTGTGAAACTGCCCAAAACTTGGT	CCCTGTAAGCAAGAAAACAGTAATCT
BICF2P838526	29	4258108	1256154	C	T	TCAATCCCCAAATCACACCTCG	TCAATCCCCAAATCACACCTCA	CACACAGCATAGCCTATAGGGGT	TGCGATTCGTCTCTGCAGT
BICF2G630411180	30	7789766	4801290	A	G	GTTATTTTGCCACAGGTTGGAGATTAA	GTTATTTTGCCACAGGTTGGAGATTAG	GGTATAATCACTTTTGAAATATAATCCTGTTAGTCTGCT	CCAAGATTATGAAAGATACTACTGAGGG
BICF2G630727706	31	5975683	2974937	A	G	GCCACAGAATAAAAAAGGAAGATACCA	GCCACAGAATAAAAAAGGAAGATACCG	CATGAGGTCTTCCCTCCACACT	GCACTTCCATCCCTAAAGCC
BICF2P452513	32	10412751	7450389	G	A	CTGAACCAACAGTACAGGCAAC	TCTGAACCAACAGTACAGGCAAT	CTTAGCTGTGAGCCTGGGTCT	TGGGCCAGCTGTGTGT
BICF2S23032408	32	36905584	33981986	G	C	TGGACTTTTAGTAATAGTTGAGGACACAC	TGGACTTTTAGTAATAGTTGAGGACACAG	AGGATTAACCCACATGGGCTCA	TCCCATGGTTCTAAAGTTCCAAAAT
TIGRP2P386601_rs9066100	33	15378492	12335231	G	A	GAAACACTATAGCCCAAAAAGTTGAGG	GAAACACTATAGCCCAAAAAGTTGAGA	AATTAAATCTCTCATACTATGTCTATAGAGCTAGAATTAC	CATCACAGAAGCCCGAAACA
BICF2G63079430	33	23124409	20083372	T	C	TGATGATCATTCATTATCAAACATTTCTGCAT	GATGATCATTCATTATCAAACATTTCTGCAC	ACAAGCAAGGTCTCAGCCTCA	GTTTCTCCCTCCTGTTTAGGTAATT
BICF2G63077185	33	30233587	27192326	T	C	TTCAGAACAGTGACTAAAGGCACT	TCAGAACAGTGACTAAAGGCACC	AAGAGTTCTCTCCAGCAGCCAT	TTCCCAAAGATTCAGGCTGTTTT
TIGRP2P400649_rs8986255	34	41390565	38385213	G	A	CACAAACGAACCACTGAGTAAAGAC	ACACAAACGAACCACTGAGTAAAGAT	AGTTAGTGACTATGCCGTTACTTTTAAGCA	TTCCTAGGCTTTTTTACACAAACGA
BICF2S23211373	35	3917812	917792	C	T	GTTGTGAGTCACCTGAGTGTTTAATTG	AGTTGTGAGTCACCTGAGTGTTTAATTA	CTGCAAATACTCAAGAGCTCTTAATAACTATGGA	GATTCTGGTTAGTTGTGAGTCACC
BICF2P1191989	36	9619558	6615417	G	A	CTACCTTCTGAGCACTTACCTTTAGAG	CTACCTTCTGAGCACTTACCTTTAGAA	TTTCGTGCTGTTGCAGTGCAT	CCACTCAAACACAATATCTGAAAGC
BICF2P1258804	36	21023303	17999649	A	G	GCGCTGTTGCACAATGAGTTT	GCGCTGTTGCACAATGAGTTC	GGGACACTCTTCCGCTGCT	CATCTGCGAGAGGAGAAATGT
BICF2P1240359	38	23105508	20105896	G	A	GGGTCCCCTCTGGAACATC	GGGTCCCCTCTGGAACATT	TGAATATGGCAAGAGGCCCCT	TGCTTCATTTCAAGAGAGGAAAGTT
BICF2P885495	38	26537886	23525635	C	A	TCATTTCATGTTTTTCGTTCCCGG	ATCATTTCATGTTTTTCGTTCCCGT	GGCACTACCGACCAGGGC	ACATCCCGCACGCATTTG
